# Supplementary material
Source: publisher site journal article supplement (http://www.spandidos-publications.com/1915/downloadSupplementary)
Supplement: Supplementary file 1 [file downloadSupplementary]

## Sheet: Up Pathway Enrichment
Table SIII. Pathway enrichment analysis of differentially expressed genes between normal aortas and Marfan syndrome tissues.
pathway_id	pathway_name	population_mapped_id	study_mapped_id	enrichment	p_value	FDR	link
hsa05410	Hypertrophic cardiomyopathy (HCM)	85	7	9.34706	2.52291e-05	0.000709281	www.kegg.jp/kegg-bin/show_pathway?map=hsa05410&multi_query=3672%09purple/3679%09red/3680%09red/3696%09purple/1674%09red/7273%09purple/70%09red/783%09red/785%09purple/5563%09purple/7042%09red/3569%09purple/3908%09red/781%09purple/
hsa05414	Dilated cardiomyopathy (DCM)	90	7	8.82778	3.5464e-05	0.000709281	www.kegg.jp/kegg-bin/show_pathway?map=hsa05414&multi_query=3672%09purple/3679%09red/3680%09red/3696%09purple/1674%09red/7273%09purple/70%09red/783%09red/785%09purple/7042%09red/3908%09red/781%09purple/
hsa05412	Arrhythmogenic right ventricular cardiomyopathy (ARVC)	74	6	9.2027	0.000100069	0.00140097	www.kegg.jp/kegg-bin/show_pathway?map=hsa05412&multi_query=3672%09purple/3679%09red/3680%09red/3696%09purple/1674%09red/783%09red/785%09purple/88%09red/3908%09red/781%09purple/
hsa04261	Adrenergic signaling in cardiomyocytes	148	6	4.60135	0.00307561	0.0288215	www.kegg.jp/kegg-bin/show_pathway?map=hsa04261&multi_query=477%09red/483%09purple/6332%09purple/783%09red/785%09purple/70%09red/146%09red/5502%09red/9586%09red/5290%09purple/781%09purple/
hsa04510	Focal adhesion	202	7	3.93317	0.00339682	0.0288215	www.kegg.jp/kegg-bin/show_pathway?map=hsa04510&multi_query=3908%09red/7057%09purple/7148%09red/3672%09purple/3679%09red/3680%09red/3696%09purple/5156%09purple/394%09purple/88%09red/2318%09red/5290%09purple/399694%09purple/329%09purple/23396%09red/
hsa00350	Tyrosine metabolism	35	3	9.72857	0.00484588	0.0376902	www.kegg.jp/kegg-bin/show_pathway?map=hsa00350&multi_query=3242%09red/8639%09red/126%09purple/316%09red/
hsa00380	Tryptophan metabolism	40	3	8.5125	0.00685066	0.0491842	www.kegg.jp/kegg-bin/show_pathway?map=hsa00380&multi_query=219%09red/316%09red/1543%09red/
hsa04512	ECM-receptor interaction	82	4	5.53659	0.0078482	0.0511046	www.kegg.jp/kegg-bin/show_pathway?map=hsa04512&multi_query=3908%09red/7057%09purple/7148%09red/3672%09purple/3679%09red/3680%09red/3696%09purple/
hsa04010	MAPK signaling pathway	255	7	3.11569	0.0109745	0.0614575	www.kegg.jp/kegg-bin/show_pathway?map=hsa04010&multi_query=783%09red/785%09purple/5922%09purple/2246%09purple/2252%09purple/5156%09purple/2353%09purple/3553%09purple/7042%09red/355%09purple/4616%09purple/2318%09red/3315%09red/5494%09purple/80824%09red/3303%09red/3304%09red/3304%09purple/3164%09purple/781%09purple/1649%09purple/
hsa00360	Phenylalanine metabolism	17	2	13.3529	0.012333	0.0664087	www.kegg.jp/kegg-bin/show_pathway?map=hsa00360&multi_query=8639%09red/3242%09red/
hsa05146	Amoebiasis	100	4	4.54	0.0149103	0.0734071	www.kegg.jp/kegg-bin/show_pathway?map=hsa05146&multi_query=3553%09purple/3315%09red/3908%09red/3569%09purple/3576%09purple/88%09red/5290%09purple/7042%09red/
hsa05134	Legionellosis	55	3	6.19091	0.0154679	0.0734071	www.kegg.jp/kegg-bin/show_pathway?map=hsa05134&multi_query=7415%09red/3303%09red/3304%09red/3304%09purple/4671%09purple/3553%09purple/3569%09purple/3576%09purple/2920%09purple/
hsa00140	Steroid hormone biosynthesis	58	3	5.87069	0.0176793	0.0798422	www.kegg.jp/kegg-bin/show_pathway?map=hsa00140&multi_query=1646%09red/1645%09red/1543%09red/
hsa04141	Protein processing in endoplasmic reticulum	169	5	3.35799	0.021663	0.0905321	www.kegg.jp/kegg-bin/show_pathway?map=hsa04141&multi_query=7991%09purple/7415%09red/3303%09red/3304%09red/3304%09purple/3337%09red/9532%09red/5610%09purple/22926%09purple/1649%09purple/
hsa05145	Toxoplasmosis	118	4	3.84746	0.0250186	0.0986648	www.kegg.jp/kegg-bin/show_pathway?map=hsa05145&multi_query=3117%09purple/3126%09purple/329%09purple/3303%09red/3304%09red/3304%09purple/3908%09red/5290%09purple/7042%09red/
hsa00760	Nicotinate and nicotinamide metabolism	29	2	7.82759	0.0312078	0.119701	www.kegg.jp/kegg-bin/show_pathway?map=hsa00760&multi_query=54981%09purple/5167%09red/10135%09purple/316%09red/
hsa00410	beta-Alanine metabolism	31	2	7.32258	0.035016	0.130726	www.kegg.jp/kegg-bin/show_pathway?map=hsa00410&multi_query=8639%09red/219%09red/
hsa04260	Cardiac muscle contraction	78	3	4.36538	0.036647	0.131553	www.kegg.jp/kegg-bin/show_pathway?map=hsa04260&multi_query=783%09red/785%09purple/70%09red/477%09red/483%09purple/781%09purple/
hsa04810	Regulation of actin cytoskeleton	214	5	2.65187	0.0495446	0.163238	www.kegg.jp/kegg-bin/show_pathway?map=hsa04810&multi_query=2246%09purple/2252%09purple/5156%09purple/3672%09purple/3679%09red/3680%09red/3696%09purple/1132%09red/9459%09purple/5290%09purple/23396%09red/5962%09purple/88%09red/
hsa04970	Salivary secretion	89	3	3.82584	0.0501374	0.163238	www.kegg.jp/kegg-bin/show_pathway?map=hsa04970&multi_query=146%09red/6263%09red/477%09red/483%09purple/
hsa04960	Aldosterone-regulated sodium reabsorption	39	2	5.82051	0.0518598	0.165008	www.kegg.jp/kegg-bin/show_pathway?map=hsa04960&multi_query=6338%09red/6446%09purple/477%09red/483%09purple/5290%09purple/
hsa00750	Vitamin B6 metabolism	6	1	18.9167	0.0604586	0.185258	www.kegg.jp/kegg-bin/show_pathway?map=hsa00750&multi_query=316%09red/
hsa04915	Estrogen signaling pathway	99	3	3.43939	0.0641725	0.185258	www.kegg.jp/kegg-bin/show_pathway?map=hsa04915&multi_query=3303%09red/3304%09red/3304%09purple/2353%09purple/9586%09red/399694%09purple/5290%09purple/
hsa04080	Neuroactive ligand-receptor interaction	305	6	2.23279	0.0648403	0.185258	www.kegg.jp/kegg-bin/show_pathway?map=hsa04080&multi_query=1132%09red/146%09red/152%09red/1909%09purple/4886%09red/5733%09purple/9934%09red/1903%09red/2743%09purple/
hsa04022	cGMP - PKG signaling pathway	167	4	2.71856	0.0692325	0.19005	www.kegg.jp/kegg-bin/show_pathway?map=hsa04022&multi_query=1909%09purple/146%09red/152%09red/477%09red/483%09purple/5997%09purple/5139%09purple/5290%09purple/9586%09red/
hsa00280	Valine, leucine and isoleucine degradation	48	2	4.72917	0.0734754	0.197818	www.kegg.jp/kegg-bin/show_pathway?map=hsa00280&multi_query=219%09red/316%09red/
hsa05144	Malaria	49	2	4.63265	0.0760276	0.200828	www.kegg.jp/kegg-bin/show_pathway?map=hsa05144&multi_query=2532%09red/7042%09red/3576%09purple/3569%09purple/3553%09purple/7057%09purple/6401%09purple/3383%09purple/
hsa04144	Endocytosis	259	5	2.19112	0.0915374	0.22219	www.kegg.jp/kegg-bin/show_pathway?map=hsa04144&multi_query=7042%09red/9765%09purple/7037%09purple/5156%09purple/23396%09red/273%09red/3303%09red/3304%09red/3304%09purple/829%09purple/57132%09purple/3107%09purple/
hsa00500	Starch and sucrose metabolism	56	2	4.05357	0.0946207	0.22219	www.kegg.jp/kegg-bin/show_pathway?map=hsa00500&multi_query=55276%09purple/5834%09red/5167%09red/
hsa05150	Staphylococcus aureus infection	56	2	4.05357	0.0946207	0.22219	www.kegg.jp/kegg-bin/show_pathway?map=hsa05150&multi_query=1675%09red/721%09red/2215%09purple/3383%09purple/3117%09purple/3126%09purple/
hsa04151	PI3K-Akt signaling pathway	341	6	1.99707	0.0960177	0.22219	www.kegg.jp/kegg-bin/show_pathway?map=hsa04151&multi_query=2246%09purple/2252%09purple/284%09purple/285%09purple/5156%09purple/3569%09purple/3908%09red/7057%09purple/7148%09red/3672%09purple/3679%09red/3680%09red/3696%09purple/5563%09purple/54541%09red/6446%09purple/9586%09red/3164%09purple/5290%09purple/
hsa00130	Ubiquinone and other terpenoid-quinone biosynthesis	11	1	10.3182	0.101358	0.232626	www.kegg.jp/kegg-bin/show_pathway?map=hsa00130&multi_query=3242%09red/
hsa05169	Epstein-Barr virus infection	202	4	2.24752	0.115105	0.255789	www.kegg.jp/kegg-bin/show_pathway?map=hsa05169&multi_query=3107%09purple/3303%09red/3304%09red/3304%09purple/3315%09red/5290%09purple/965%09purple/3383%09purple/7128%09purple/23586%09purple/5610%09purple/3117%09purple/3126%09purple/5433%09red/
hsa04213	Longevity regulating pathway - multiple species	64	2	3.54688	0.11722	0.256419	www.kegg.jp/kegg-bin/show_pathway?map=hsa04213&multi_query=5290%09purple/5563%09purple/3303%09red/3304%09red/3304%09purple/
hsa00830	Retinol metabolism	65	2	3.49231	0.120131	0.258744	www.kegg.jp/kegg-bin/show_pathway?map=hsa00830&multi_query=126%09purple/316%09red/1543%09red/
hsa05162	Measles	136	3	2.50368	0.128719	0.270987	www.kegg.jp/kegg-bin/show_pathway?map=hsa05162&multi_query=30835%09red/4179%09purple/5290%09purple/23586%09purple/64135%09purple/7128%09purple/3553%09purple/3569%09purple/3303%09red/3304%09red/3304%09purple/5610%09purple/355%09purple/
hsa04918	Thyroid hormone synthesis	71	2	3.19718	0.137944	0.286107	www.kegg.jp/kegg-bin/show_pathway?map=hsa04918&multi_query=9586%09red/477%09red/483%09purple/
hsa00980	Metabolism of xenobiotics by cytochrome P450	73	2	3.10959	0.144001	0.294308	www.kegg.jp/kegg-bin/show_pathway?map=hsa00980&multi_query=1543%09red/1645%09red/126%09purple/
hsa04520	Adherens junction	74	2	3.06757	0.147049	0.296119	www.kegg.jp/kegg-bin/show_pathway?map=hsa04520&multi_query=10580%09red/88%09red/
hsa00910	Nitrogen metabolism	17	1	6.67647	0.148059	0.296119	www.kegg.jp/kegg-bin/show_pathway?map=hsa00910&multi_query=761%09red/
hsa00770	Pantothenate and CoA biosynthesis	18	1	6.30556	0.1556	0.305977	www.kegg.jp/kegg-bin/show_pathway?map=hsa00770&multi_query=80025%09purple/5167%09red/8875%09purple/
hsa04612	Antigen processing and presentation	77	2	2.94805	0.156267	0.305977	www.kegg.jp/kegg-bin/show_pathway?map=hsa04612&multi_query=3303%09red/3304%09red/3304%09purple/3107%09purple/3117%09purple/3126%09purple/
hsa04610	Complement and coagulation cascades	79	2	2.87342	0.16247	0.313734	www.kegg.jp/kegg-bin/show_pathway?map=hsa04610&multi_query=7035%09purple/5329%09purple/1675%09red/721%09red/4179%09purple/
hsa05204	Chemical carcinogenesis	82	2	2.76829	0.17185	0.327334	www.kegg.jp/kegg-bin/show_pathway?map=hsa05204&multi_query=1543%09red/5743%09purple/126%09purple/1646%09red/
hsa04350	TGF-beta signaling pathway	84	2	2.70238	0.17815	0.334779	www.kegg.jp/kegg-bin/show_pathway?map=hsa04350&multi_query=7057%09purple/7042%09red/25805%09red/9765%09purple/3399%09purple/3400%09purple/
hsa04911	Insulin secretion	85	2	2.67059	0.181313	0.336209	www.kegg.jp/kegg-bin/show_pathway?map=hsa04911&multi_query=477%09red/483%09purple/9586%09red/
hsa04964	Proximal tubule bicarbonate reclamation	23	1	4.93478	0.192297	0.354231	www.kegg.jp/kegg-bin/show_pathway?map=hsa04964&multi_query=477%09red/483%09purple/
hsa00340	Histidine metabolism	24	1	4.72917	0.19944	0.364988	www.kegg.jp/kegg-bin/show_pathway?map=hsa00340&multi_query=219%09red/
hsa04666	Fc gamma R-mediated phagocytosis	93	2	2.44086	0.206862	0.373686	www.kegg.jp/kegg-bin/show_pathway?map=hsa04666&multi_query=5290%09purple/4082%09purple/23396%09red/273%09red/
hsa05164	Influenza A	175	3	1.94571	0.212202	0.376055	www.kegg.jp/kegg-bin/show_pathway?map=hsa05164&multi_query=3337%09red/3303%09red/3304%09red/3304%09purple/5610%09purple/23586%09purple/64135%09purple/7098%09purple/5290%09purple/3553%09purple/3569%09purple/3576%09purple/3383%09purple/9021%09purple/3117%09purple/3126%09purple/355%09purple/91543%09purple/10625%09purple/
hsa00053	Ascorbate and aldarate metabolism	27	1	4.2037	0.220486	0.388277	www.kegg.jp/kegg-bin/show_pathway?map=hsa00053&multi_query=219%09red/
hsa04922	Glucagon signaling pathway	101	2	2.24752	0.232724	0.399771	www.kegg.jp/kegg-bin/show_pathway?map=hsa04922&multi_query=9586%09red/150094%09purple/5834%09red/5563%09purple/
hsa05231	Choline metabolism in cancer	101	2	2.24752	0.232724	0.399771	www.kegg.jp/kegg-bin/show_pathway?map=hsa05231&multi_query=5156%09purple/5290%09purple/23396%09red/6581%09red/2353%09purple/56261%09purple/
hsa00512	Mucin type O-glycan biosynthesis	31	1	3.66129	0.247675	0.42286	www.kegg.jp/kegg-bin/show_pathway?map=hsa00512&multi_query=57452%09red/2589%09purple/
hsa03020	RNA polymerase	32	1	3.54688	0.254321	0.431575	www.kegg.jp/kegg-bin/show_pathway?map=hsa03020&multi_query=5433%09red/
hsa04931	Insulin resistance	109	2	2.08257	0.258731	0.4338	www.kegg.jp/kegg-bin/show_pathway?map=hsa04931&multi_query=5290%09purple/3569%09purple/9021%09purple/5563%09purple/5834%09red/9586%09red/
hsa04725	Cholinergic synapse	111	2	2.04505	0.265238	0.43609	www.kegg.jp/kegg-bin/show_pathway?map=hsa04725&multi_query=1132%09red/2353%09purple/9586%09red/5290%09purple/
hsa04024	cAMP signaling pathway	199	3	1.71106	0.267884	0.43609	www.kegg.jp/kegg-bin/show_pathway?map=hsa04024&multi_query=1909%09purple/4886%09red/5733%09purple/5290%09purple/9586%09red/2353%09purple/5727%09purple/477%09red/483%09purple/5139%09purple/
hsa05020	Prion diseases	35	1	3.24286	0.273902	0.44331	www.kegg.jp/kegg-bin/show_pathway?map=hsa05020&multi_query=1958%09purple/3553%09purple/3569%09purple/3303%09red/
hsa00040	Pentose and glucuronate interconversions	36	1	3.15278	0.280313	0.451078	www.kegg.jp/kegg-bin/show_pathway?map=hsa00040&multi_query=6120%09purple/219%09red/
hsa00260	Glycine, serine and threonine metabolism	40	1	2.8375	0.305384	0.488615	www.kegg.jp/kegg-bin/show_pathway?map=hsa00260&multi_query=8639%09red/1491%09purple/
hsa00620	Pyruvate metabolism	41	1	2.76829	0.311512	0.495588	www.kegg.jp/kegg-bin/show_pathway?map=hsa00620&multi_query=219%09red/
hsa04270	Vascular smooth muscle contraction	130	2	1.74615	0.326688	0.507614	www.kegg.jp/kegg-bin/show_pathway?map=hsa04270&multi_query=146%09red/1909%09purple/72%09red/
hsa00071	Fatty acid degradation	44	1	2.57955	0.329569	0.507614	www.kegg.jp/kegg-bin/show_pathway?map=hsa00071&multi_query=126%09purple/219%09red/
hsa02010	ABC transporters	44	1	2.57955	0.329569	0.507614	www.kegg.jp/kegg-bin/show_pathway?map=hsa02010&multi_query=9619%09red/
hsa04962	Vasopressin-regulated water reabsorption	44	1	2.57955	0.329569	0.507614	www.kegg.jp/kegg-bin/show_pathway?map=hsa04962&multi_query=9586%09red/79659%09purple/
hsa00565	Ether lipid metabolism	45	1	2.52222	0.335481	0.507614	www.kegg.jp/kegg-bin/show_pathway?map=hsa00565&multi_query=133121%09red/
hsa04973	Carbohydrate digestion and absorption	45	1	2.52222	0.335481	0.507614	www.kegg.jp/kegg-bin/show_pathway?map=hsa04973&multi_query=477%09red/483%09purple/5290%09purple/
hsa03040	Spliceosome	134	2	1.69403	0.339459	0.507614	www.kegg.jp/kegg-bin/show_pathway?map=hsa03040&multi_query=23350%09purple/3303%09red/3304%09red/3304%09purple/9984%09purple/6426%09purple/3192%09purple/
hsa04068	FoxO signaling pathway	134	2	1.69403	0.339459	0.507614	www.kegg.jp/kegg-bin/show_pathway?map=hsa04068&multi_query=7042%09red/5563%09purple/5290%09purple/6446%09purple/3569%09purple/2290%09red/10769%09purple/4616%09purple/114907%09purple/
hsa05322	Systemic lupus erythematosus	135	2	1.68148	0.342639	0.507614	www.kegg.jp/kegg-bin/show_pathway?map=hsa05322&multi_query=721%09red/3021%09purple/88%09red/3117%09purple/3126%09purple/2215%09purple/
hsa04961	Endocrine and other factor-regulated calcium reabsorption	47	1	2.41489	0.347145	0.511582	www.kegg.jp/kegg-bin/show_pathway?map=hsa04961&multi_query=477%09red/483%09purple/
hsa04910	Insulin signaling pathway	139	2	1.63309	0.355305	0.518153	www.kegg.jp/kegg-bin/show_pathway?map=hsa04910&multi_query=5290%09purple/5834%09red/10580%09red/5563%09purple/399694%09purple/9021%09purple/
hsa05030	Cocaine addiction	49	1	2.31633	0.358602	0.518414	www.kegg.jp/kegg-bin/show_pathway?map=hsa05030&multi_query=9586%09red/2354%09purple/
hsa00330	Arginine and proline metabolism	50	1	2.27	0.364253	0.518414	www.kegg.jp/kegg-bin/show_pathway?map=hsa00330&multi_query=219%09red/6303%09purple/
hsa04913	Ovarian Steroidogenesis	50	1	2.27	0.364253	0.518414	www.kegg.jp/kegg-bin/show_pathway?map=hsa04913&multi_query=5743%09purple/1543%09red/
hsa04514	Cell adhesion molecules (CAMs)	142	2	1.59859	0.364741	0.518414	www.kegg.jp/kegg-bin/show_pathway?map=hsa04514&multi_query=965%09purple/3117%09purple/3126%09purple/3107%09purple/214%09purple/3383%09purple/3680%09red/947%09red/6401%09purple/3696%09purple/9378%09purple/
hsa04978	Mineral absorption	51	1	2.22549	0.369854	0.523026	www.kegg.jp/kegg-bin/show_pathway?map=hsa04978&multi_query=54822%09purple/477%09red/483%09purple/
hsa00310	Lysine degradation	52	1	2.18269	0.375405	0.525499	www.kegg.jp/kegg-bin/show_pathway?map=hsa00310&multi_query=10157%09purple/219%09red/
hsa05161	Hepatitis B	146	2	1.55479	0.377233	0.525499	www.kegg.jp/kegg-bin/show_pathway?map=hsa05161&multi_query=7042%09red/1959%09purple/1960%09purple/355%09purple/5290%09purple/3576%09purple/9586%09red/2353%09purple/7098%09purple/23586%09purple/64135%09purple/3569%09purple/
hsa04923	Regulation of lipolysis in adipocyte	56	1	2.02679	0.397116	0.550458	www.kegg.jp/kegg-bin/show_pathway?map=hsa04923&multi_query=5290%09purple/5743%09purple/5733%09purple/4886%09red/
hsa00561	Glycerolipid metabolism	59	1	1.92373	0.412895	0.562738	www.kegg.jp/kegg-bin/show_pathway?map=hsa00561&multi_query=219%09red/2710%09purple/129642%09purple/1056%09purple/
hsa05416	Viral myocarditis	59	1	1.92373	0.412895	0.562738	www.kegg.jp/kegg-bin/show_pathway?map=hsa05416&multi_query=3117%09purple/3126%09purple/3107%09purple/3383%09purple/3908%09red/
hsa04921	Oxytocin signaling pathway	158	2	1.43671	0.414014	0.562738	www.kegg.jp/kegg-bin/show_pathway?map=hsa04921&multi_query=5743%09purple/2353%09purple/6263%09red/783%09red/785%09purple/5997%09purple/5563%09purple/5290%09purple/781%09purple/
hsa04150	mTOR signaling pathway	60	1	1.89167	0.418061	0.565493	www.kegg.jp/kegg-bin/show_pathway?map=hsa04150&multi_query=5290%09purple/54541%09red/5563%09purple/
hsa04370	VEGF signaling pathway	61	1	1.86066	0.42318	0.569666	www.kegg.jp/kegg-bin/show_pathway?map=hsa04370&multi_query=5743%09purple/3315%09red/5290%09purple/
hsa05210	Colorectal cancer	62	1	1.83065	0.428254	0.573738	www.kegg.jp/kegg-bin/show_pathway?map=hsa05210&multi_query=5290%09purple/2353%09purple/7042%09red/
hsa05321	Inflammatiory bowel disease (IBD)	65	1	1.74615	0.443206	0.589053	www.kegg.jp/kegg-bin/show_pathway?map=hsa05321&multi_query=3117%09purple/3126%09purple/3569%09purple/3553%09purple/7042%09red/
hsa04720	Long-term potentiation	66	1	1.7197	0.448101	0.589053	www.kegg.jp/kegg-bin/show_pathway?map=hsa04720&multi_query=5502%09red/
hsa05212	Pancreatic cancer	66	1	1.7197	0.448101	0.589053	www.kegg.jp/kegg-bin/show_pathway?map=hsa05212&multi_query=5290%09purple/9459%09purple/7042%09red/
hsa05211	Renal cell carcinoma	66	1	1.7197	0.448101	0.589053	www.kegg.jp/kegg-bin/show_pathway?map=hsa05211&multi_query=7042%09red/5290%09purple/
hsa05031	Amphetamine addiction	67	1	1.69403	0.452952	0.592648	www.kegg.jp/kegg-bin/show_pathway?map=hsa05031&multi_query=9586%09red/2353%09purple/2354%09purple/
hsa00010	Glycolysis / Gluconeogenesis	68	1	1.66912	0.45776	0.59343	www.kegg.jp/kegg-bin/show_pathway?map=hsa00010&multi_query=126%09purple/219%09red/55276%09purple/
hsa00982	Drug metabolism - cytochrome P450	69	1	1.64493	0.462525	0.59343	www.kegg.jp/kegg-bin/show_pathway?map=hsa00982&multi_query=126%09purple/316%09red/
hsa03320	PPAR signaling pathway	69	1	1.64493	0.462525	0.59343	www.kegg.jp/kegg-bin/show_pathway?map=hsa03320&multi_query=10580%09red/2710%09purple/
hsa00230	Purine metabolism	176	2	1.28977	0.466929	0.59343	www.kegg.jp/kegg-bin/show_pathway?map=hsa00230&multi_query=55276%09purple/5136%09purple/5139%09purple/10846%09purple/5167%09red/5433%09red/
hsa00562	Inositol phosphate metabolism	71	1	1.59859	0.471928	0.59343	www.kegg.jp/kegg-bin/show_pathway?map=hsa00562&multi_query=23396%09red/5290%09purple/
hsa04976	Bile secretion	71	1	1.59859	0.471928	0.59343	www.kegg.jp/kegg-bin/show_pathway?map=hsa04976&multi_query=477%09red/483%09purple/
hsa05152	Tuberculosis	178	2	1.27528	0.472625	0.59343	www.kegg.jp/kegg-bin/show_pathway?map=hsa05152&multi_query=3117%09purple/3126%09purple/64581%09purple/3569%09purple/3553%09purple/30835%09red/7042%09red/22925%09purple/2215%09purple/
hsa04020	Calcium signaling pathway	180	2	1.26111	0.478282	0.593507	www.kegg.jp/kegg-bin/show_pathway?map=hsa04020&multi_query=6263%09red/146%09red/1909%09purple/5733%09purple/5156%09purple/5136%09purple/
hsa05220	Chronic myeloid leukemia	73	1	1.55479	0.481164	0.593507	www.kegg.jp/kegg-bin/show_pathway?map=hsa05220&multi_query=5290%09purple/399694%09purple/7042%09red/
hsa05140	Leishmaniasis	73	1	1.55479	0.481164	0.593507	www.kegg.jp/kegg-bin/show_pathway?map=hsa05140&multi_query=3553%09purple/7042%09red/2215%09purple/5743%09purple/2353%09purple/3117%09purple/3126%09purple/
hsa04971	Gastric acid secretion	74	1	1.53378	0.48572	0.596499	www.kegg.jp/kegg-bin/show_pathway?map=hsa04971&multi_query=3772%09purple/477%09red/483%09purple/
hsa05133	Pertussis	75	1	1.51333	0.490236	0.596672	www.kegg.jp/kegg-bin/show_pathway?map=hsa05133&multi_query=3553%09purple/721%09red/2353%09purple/3569%09purple/3576%09purple/
hsa05206	MicroRNAs in cancer	297	3	1.14646	0.494385	0.596672	www.kegg.jp/kegg-bin/show_pathway?map=hsa05206&multi_query=406991%09purple/407021%09purple/7042%09red/54541%09red/5962%09purple/7148%09red/7057%09purple/406977%09purple/5743%09purple/5156%09purple/399694%09purple/4082%09purple/5290%09purple/
hsa03018	RNA degradation	77	1	1.47403	0.499147	0.599833	www.kegg.jp/kegg-bin/show_pathway?map=hsa03018&multi_query=22894%09purple/23517%09purple/10140%09purple/10950%09red/7832%09purple/
hsa05016	Huntington's disease	193	2	1.17617	0.514087	0.612529	www.kegg.jp/kegg-bin/show_pathway?map=hsa05016&multi_query=9586%09red/4708%09purple/5433%09red/
hsa04925	Aldosterone synthesis and secretion	81	1	1.40123	0.516497	0.612793	www.kegg.jp/kegg-bin/show_pathway?map=hsa04925&multi_query=9586%09red/4929%09purple/3164%09purple/
hsa04742	Taste transduction	83	1	1.36747	0.524941	0.620184	www.kegg.jp/kegg-bin/show_pathway?map=hsa04742&multi_query=6338%09red/259294%09purple/259295%09purple/259296%09purple/50838%09purple/50840%09purple/259293%09purple/5136%09purple/
hsa05222	Small cell lung cancer	86	1	1.31977	0.537329	0.626104	www.kegg.jp/kegg-bin/show_pathway?map=hsa05222&multi_query=3908%09red/5290%09purple/329%09purple/5743%09purple/
hsa05132	Salmonella infection	86	1	1.31977	0.537329	0.626104	www.kegg.jp/kegg-bin/show_pathway?map=hsa05132&multi_query=2353%09purple/3553%09purple/3569%09purple/3576%09purple/2920%09purple/79659%09purple/2318%09red/
hsa05205	Proteoglycans in cancer	203	2	1.11823	0.540456	0.626104	www.kegg.jp/kegg-bin/show_pathway?map=hsa05205&multi_query=2318%09red/5290%09purple/406991%09purple/7057%09purple/355%09purple/7042%09red/5329%09purple/5962%09purple/5727%09purple/
hsa04640	Hematopoietic cell lineage	88	1	1.28977	0.545404	0.626104	www.kegg.jp/kegg-bin/show_pathway?map=hsa04640&multi_query=3569%09purple/3553%09purple/947%09red/7037%09purple/3672%09purple/3126%09purple/
hsa05203	Viral carcinogenesis	205	2	1.10732	0.545605	0.626104	www.kegg.jp/kegg-bin/show_pathway?map=hsa05203&multi_query=9586%09red/5290%09purple/5966%09purple/1959%09purple/1960%09purple/6672%09purple/5610%09purple/5922%09purple/88%09red/3107%09purple/
hsa05215	Prostate cancer	89	1	1.27528	0.549388	0.627263	www.kegg.jp/kegg-bin/show_pathway?map=hsa05215&multi_query=5156%09purple/5290%09purple/9586%09red/
hsa04974	Protein digestion and absorption	90	1	1.26111	0.553336	0.627263	www.kegg.jp/kegg-bin/show_pathway?map=hsa04974&multi_query=477%09red/483%09purple/54407%09purple/1300%09purple/
hsa05323	Rheumatoid arthritis	90	1	1.26111	0.553336	0.627263	www.kegg.jp/kegg-bin/show_pathway?map=hsa05323&multi_query=3117%09purple/3126%09purple/3383%09purple/10673%09purple/3553%09purple/3569%09purple/2353%09purple/7042%09red/51382%09purple/3576%09purple/284%09purple/
hsa04211	Longevity regulating pathway - mammal	94	1	1.20745	0.568781	0.642172	www.kegg.jp/kegg-bin/show_pathway?map=hsa04211&multi_query=5290%09purple/9586%09red/9821%09purple/5563%09purple/143686%09purple/
hsa04713	Circadian entrainment	95	1	1.19474	0.572557	0.643839	www.kegg.jp/kegg-bin/show_pathway?map=hsa04713&multi_query=6263%09red/2353%09purple/
hsa04070	Phosphatidylinositol signaling system	98	1	1.15816	0.583684	0.651122	www.kegg.jp/kegg-bin/show_pathway?map=hsa04070&multi_query=23396%09red/5290%09purple/23262%09purple/
hsa04972	Pancreatic secretion	98	1	1.15816	0.583684	0.651122	www.kegg.jp/kegg-bin/show_pathway?map=hsa04972&multi_query=477%09red/483%09purple/1056%09purple/
hsa04933	AGE-RAGE signaling pathway in diabetic complications	101	1	1.12376	0.594517	0.660574	www.kegg.jp/kegg-bin/show_pathway?map=hsa04933&multi_query=7042%09red/6401%09purple/3383%09purple/3553%09purple/3569%09purple/3576%09purple/5290%09purple/1958%09purple/
hsa05142	Chagas disease (American trypanosomiasis)	104	1	1.09135	0.605064	0.669636	www.kegg.jp/kegg-bin/show_pathway?map=hsa05142&multi_query=2353%09purple/3569%09purple/3576%09purple/3553%09purple/7042%09red/5290%09purple/355%09purple/
hsa00240	Pyrimidine metabolism	105	1	1.08095	0.608517	0.670806	www.kegg.jp/kegg-bin/show_pathway?map=hsa00240&multi_query=5433%09red/
hsa04668	TNF signaling pathway	110	1	1.03182	0.625329	0.686636	www.kegg.jp/kegg-bin/show_pathway?map=hsa04668&multi_query=329%09purple/9586%09red/2920%09purple/355%09purple/3553%09purple/3569%09purple/9021%09purple/7128%09purple/2353%09purple/3726%09purple/3383%09purple/6401%09purple/5743%09purple/5290%09purple/
hsa04670	Leukocyte transendothelial migration	118	1	0.961864	0.650717	0.708952	www.kegg.jp/kegg-bin/show_pathway?map=hsa04670&multi_query=5290%09purple/3383%09purple/394%09purple/88%09red/
hsa04919	Thyroid hormone signaling pathway	118	1	0.961864	0.650717	0.708952	www.kegg.jp/kegg-bin/show_pathway?map=hsa04919&multi_query=477%09red/483%09purple/5290%09purple/
hsa04071	Sphingolipid signaling pathway	120	1	0.945833	0.656786	0.712791	www.kegg.jp/kegg-bin/show_pathway?map=hsa04071&multi_query=5290%09purple/1903%09red/
hsa04152	AMPK signaling pathway	124	1	0.915323	0.668606	0.720037	www.kegg.jp/kegg-bin/show_pathway?map=hsa04152&multi_query=5563%09purple/9586%09red/5290%09purple/
hsa04110	Cell cycle	124	1	0.915323	0.668606	0.720037	www.kegg.jp/kegg-bin/show_pathway?map=hsa04110&multi_query=7042%09red/902%09purple/4616%09purple/4999%09purple/4171%09purple/
hsa04728	Dopaminergic synapse	129	1	0.879845	0.6828	0.732506	www.kegg.jp/kegg-bin/show_pathway?map=hsa04728&multi_query=2353%09purple/9586%09red/9575%09purple/
hsa04060	Cytokine-cytokine receptor interaction	269	2	0.843866	0.688221	0.732707	www.kegg.jp/kegg-bin/show_pathway?map=hsa04060&multi_query=2920%09purple/3576%09purple/3569%09purple/10673%09purple/7042%09red/3553%09purple/5156%09purple/51330%09red/355%09purple/
hsa04380	Osteoclast differentiation	132	1	0.859848	0.691019	0.732899	www.kegg.jp/kegg-bin/show_pathway?map=hsa04380&multi_query=5290%09purple/3553%09purple/7042%09red/2353%09purple/2354%09purple/3726%09purple/2215%09purple/9021%09purple/
hsa04740	Olfactory transduction	415	3	0.820482	0.709136	0.741128	www.kegg.jp/kegg-bin/show_pathway?map=hsa04740&multi_query=81696%09red/390078%09red/390058%09red/5997%09purple/5136%09purple/
hsa04530	Tight junction	139	1	0.816547	0.709365	0.741128	www.kegg.jp/kegg-bin/show_pathway?map=hsa04530&multi_query=88%09red/
hsa04310	Wnt signaling pathway	143	1	0.793706	0.719348	0.748522	www.kegg.jp/kegg-bin/show_pathway?map=hsa04310&multi_query=25805%09red/
hsa04072	Phospholipase D signaling pathway	144	1	0.788194	0.721789	0.748522	www.kegg.jp/kegg-bin/show_pathway?map=hsa04072&multi_query=5156%09purple/399694%09purple/5290%09purple/23396%09red/3576%09purple/
hsa04390	Hippo signaling pathway	154	1	0.737013	0.745042	0.766955	www.kegg.jp/kegg-bin/show_pathway?map=hsa04390&multi_query=2246%09purple/7042%09red/329%09purple/
hsa04145	Phagosome	154	1	0.737013	0.745042	0.766955	www.kegg.jp/kegg-bin/show_pathway?map=hsa04145&multi_query=3107%09purple/3117%09purple/3126%09purple/7037%09purple/51382%09purple/79659%09purple/2215%09purple/7057%09purple/22925%09purple/30835%09red/64581%09purple/
hsa04630	Jak-STAT signaling pathway	158	1	0.718354	0.753781	0.773109	www.kegg.jp/kegg-bin/show_pathway?map=hsa04630&multi_query=3569%09purple/9021%09purple/316%09red/5290%09purple/
hsa05010	Alzheimer's disease	168	1	0.675595	0.774323	0.791279	www.kegg.jp/kegg-bin/show_pathway?map=hsa05010&multi_query=4708%09purple/355%09purple/6263%09red/22926%09purple/3553%09purple/
hsa04360	Axon guidance	174	1	0.652299	0.785803	0.80009	www.kegg.jp/kegg-bin/show_pathway?map=hsa04360&multi_query=9423%09red/5727%09purple/5290%09purple/
hsa05034	Alcoholism	179	1	0.634078	0.794916	0.805319	www.kegg.jp/kegg-bin/show_pathway?map=hsa05034&multi_query=3021%09purple/9586%09red/399694%09purple/2354%09purple/
hsa05202	Transcriptional misregulation in cancers	180	1	0.630556	0.796691	0.805319	www.kegg.jp/kegg-bin/show_pathway?map=hsa05202&multi_query=597%09purple/221037%09purple/5966%09purple/3021%09purple/7102%09red/8013%09purple/3569%09purple/64332%09purple/3576%09purple/4221%09purple/1649%09purple/
hsa05200	Pathways in cancer	397	2	0.571788	0.86227	0.865361	www.kegg.jp/kegg-bin/show_pathway?map=hsa05200&multi_query=5733%09purple/3908%09red/5290%09purple/5743%09purple/329%09purple/1909%09purple/5156%09purple/2246%09purple/2252%09purple/2353%09purple/3576%09purple/3569%09purple/7042%09red/355%09purple/5727%09purple/
hsa05166	HTLV-I infection	258	1	0.439922	0.896408	0.896408	www.kegg.jp/kegg-bin/show_pathway?map=hsa05166&multi_query=7042%09red/3383%09purple/3107%09purple/5156%09purple/5290%09purple/3569%09purple/7538%09purple/3117%09purple/3126%09purple/2353%09purple/1958%09purple/1959%09purple/

## Sheet: Up Pathway Gene
pathway_id	pathway_name	symbol	gene_synonyms	description	map_name	population_mapped_id	study_mapped_id	enrichment	p_value	FDR
hsa05410	Hypertrophic cardiomyopathy (HCM)	ITGA7	-	integrin subunit alpha 7	ITGA7	85	7	9.34706	2.52291e-05	0.000709281
hsa05410	Hypertrophic cardiomyopathy (HCM)	ITGA9	ALPHA-RLC|ITGA4L|RLC	integrin subunit alpha 9	ITGA9	85	7	9.34706	2.52291e-05	0.000709281
hsa05410	Hypertrophic cardiomyopathy (HCM)	DES	CSM1|CSM2|LGMD2R	desmin	DES	85	7	9.34706	2.52291e-05	0.000709281
hsa05410	Hypertrophic cardiomyopathy (HCM)	ACTC1	ACTC|ASD5|CMD1R|CMH11|LVNC4	actin, alpha, cardiac muscle 1	ACTC1	85	7	9.34706	2.52291e-05	0.000709281
hsa05410	Hypertrophic cardiomyopathy (HCM)	CACNB2	CACNLB2|CAVB2|MYSB	calcium channel, voltage-dependent, beta 2 subunit	CACNB2	85	7	9.34706	2.52291e-05	0.000709281
hsa05410	Hypertrophic cardiomyopathy (HCM)	TGFB2	LDS4|TGF-beta2	transforming growth factor beta 2	TGFB2	85	7	9.34706	2.52291e-05	0.000709281
hsa05410	Hypertrophic cardiomyopathy (HCM)	LAMA2	LAMM	laminin subunit alpha 2	LAMA1_2	85	7	9.34706	2.52291e-05	0.000709281
hsa05414	Dilated cardiomyopathy (DCM)	ITGA7	-	integrin subunit alpha 7	ITGA7	90	7	8.82778	3.5464e-05	0.000709281
hsa05414	Dilated cardiomyopathy (DCM)	ITGA9	ALPHA-RLC|ITGA4L|RLC	integrin subunit alpha 9	ITGA9	90	7	8.82778	3.5464e-05	0.000709281
hsa05414	Dilated cardiomyopathy (DCM)	DES	CSM1|CSM2|LGMD2R	desmin	DES	90	7	8.82778	3.5464e-05	0.000709281
hsa05414	Dilated cardiomyopathy (DCM)	ACTC1	ACTC|ASD5|CMD1R|CMH11|LVNC4	actin, alpha, cardiac muscle 1	ACTC1	90	7	8.82778	3.5464e-05	0.000709281
hsa05414	Dilated cardiomyopathy (DCM)	CACNB2	CACNLB2|CAVB2|MYSB	calcium channel, voltage-dependent, beta 2 subunit	CACNB2	90	7	8.82778	3.5464e-05	0.000709281
hsa05414	Dilated cardiomyopathy (DCM)	TGFB2	LDS4|TGF-beta2	transforming growth factor beta 2	TGFB2	90	7	8.82778	3.5464e-05	0.000709281
hsa05414	Dilated cardiomyopathy (DCM)	LAMA2	LAMM	laminin subunit alpha 2	LAMA1_2	90	7	8.82778	3.5464e-05	0.000709281
hsa05412	Arrhythmogenic right ventricular cardiomyopathy (ARVC)	ITGA7	-	integrin subunit alpha 7	ITGA7	74	6	9.2027	0.000100069	0.00140097
hsa05412	Arrhythmogenic right ventricular cardiomyopathy (ARVC)	ITGA9	ALPHA-RLC|ITGA4L|RLC	integrin subunit alpha 9	ITGA9	74	6	9.2027	0.000100069	0.00140097
hsa05412	Arrhythmogenic right ventricular cardiomyopathy (ARVC)	DES	CSM1|CSM2|LGMD2R	desmin	DES	74	6	9.2027	0.000100069	0.00140097
hsa05412	Arrhythmogenic right ventricular cardiomyopathy (ARVC)	CACNB2	CACNLB2|CAVB2|MYSB	calcium channel, voltage-dependent, beta 2 subunit	CACNB2	74	6	9.2027	0.000100069	0.00140097
hsa05412	Arrhythmogenic right ventricular cardiomyopathy (ARVC)	ACTN2	CMD1AA|CMH23	actinin alpha 2	ACTN	74	6	9.2027	0.000100069	0.00140097
hsa05412	Arrhythmogenic right ventricular cardiomyopathy (ARVC)	LAMA2	LAMM	laminin subunit alpha 2	LAMA1_2	74	6	9.2027	0.000100069	0.00140097
hsa04261	Adrenergic signaling in cardiomyocytes	ATP1A2	FHM2|MHP2	ATPase, Na+/K+ transporting, alpha 2 polypeptide	ATP1A	148	6	4.60135	0.00307561	0.0288215
hsa04261	Adrenergic signaling in cardiomyocytes	CACNB2	CACNLB2|CAVB2|MYSB	calcium channel, voltage-dependent, beta 2 subunit	CACNB2	148	6	4.60135	0.00307561	0.0288215
hsa04261	Adrenergic signaling in cardiomyocytes	ACTC1	ACTC|ASD5|CMD1R|CMH11|LVNC4	actin, alpha, cardiac muscle 1	ACTC1	148	6	4.60135	0.00307561	0.0288215
hsa04261	Adrenergic signaling in cardiomyocytes	ADRA1D	ADRA1|ADRA1A|ADRA1R|ALPHA1|DAR|dJ779E11.2	adrenoceptor alpha 1D	ADRA1D	148	6	4.60135	0.00307561	0.0288215
hsa04261	Adrenergic signaling in cardiomyocytes	PPP1R1A	I1|IPP1	protein phosphatase 1 regulatory inhibitor subunit 1A	PPP1R1A	148	6	4.60135	0.00307561	0.0288215
hsa04261	Adrenergic signaling in cardiomyocytes	CREB5	CRE-BPA|CREB-5	cAMP responsive element binding protein 5	CREB5	148	6	4.60135	0.00307561	0.0288215
hsa04510	Focal adhesion	LAMA2	LAMM	laminin subunit alpha 2	LAMA1_2	202	7	3.93317	0.00339682	0.0288215
hsa04510	Focal adhesion	TNXB	EDS3|HXBL|TENX|TN-X|TNX|TNXB1|TNXB2|TNXBS|VUR8|XB|XBS	tenascin XB	TN	202	7	3.93317	0.00339682	0.0288215
hsa04510	Focal adhesion	ITGA7	-	integrin subunit alpha 7	ITGA7	202	7	3.93317	0.00339682	0.0288215
hsa04510	Focal adhesion	ITGA9	ALPHA-RLC|ITGA4L|RLC	integrin subunit alpha 9	ITGA9	202	7	3.93317	0.00339682	0.0288215
hsa04510	Focal adhesion	ACTN2	CMD1AA|CMH23	actinin alpha 2	ACTN	202	7	3.93317	0.00339682	0.0288215
hsa04510	Focal adhesion	FLNC	ABP-280|ABP280A|ABPA|ABPL|FLN2|MFM5|MPD4	filamin C	FLNA	202	7	3.93317	0.00339682	0.0288215
hsa04510	Focal adhesion	PIP5K1C	LCCS3|PIP5K-GAMMA|PIP5K1-gamma|PIP5Kgamma	phosphatidylinositol-4-phosphate 5-kinase, type I, gamma	PIP5K	202	7	3.93317	0.00339682	0.0288215
hsa00350	Tyrosine metabolism	HPD	4-HPPD|4HPPD|GLOD3|HPPDASE|PPD	4-hydroxyphenylpyruvate dioxygenase	HPD	35	3	9.72857	0.00484588	0.0376902
hsa00350	Tyrosine metabolism	AOC3	HPAO|SSAO|VAP-1|VAP1	amine oxidase, copper containing 3	AOC3	35	3	9.72857	0.00484588	0.0376902
hsa00350	Tyrosine metabolism	AOX1	AO|AOH1	aldehyde oxidase 1	AOX	35	3	9.72857	0.00484588	0.0376902
hsa00380	Tryptophan metabolism	ALDH1B1	ALDH5|ALDHX	aldehyde dehydrogenase 1 family member B1	E1.2.1.3	40	3	8.5125	0.00685066	0.0491842
hsa00380	Tryptophan metabolism	AOX1	AO|AOH1	aldehyde oxidase 1	AOX	40	3	8.5125	0.00685066	0.0491842
hsa00380	Tryptophan metabolism	CYP1A1	AHH|AHRR|CP11|CYP1|CYPIA1|P1-450|P450-C|P450DX	cytochrome P450 family 1 subfamily A member 1	CYP1A1	40	3	8.5125	0.00685066	0.0491842
hsa04512	ECM-receptor interaction	LAMA2	LAMM	laminin subunit alpha 2	LAMA1_2	82	4	5.53659	0.0078482	0.0511046
hsa04512	ECM-receptor interaction	TNXB	EDS3|HXBL|TENX|TN-X|TNX|TNXB1|TNXB2|TNXBS|VUR8|XB|XBS	tenascin XB	TN	82	4	5.53659	0.0078482	0.0511046
hsa04512	ECM-receptor interaction	ITGA7	-	integrin subunit alpha 7	ITGA7	82	4	5.53659	0.0078482	0.0511046
hsa04512	ECM-receptor interaction	ITGA9	ALPHA-RLC|ITGA4L|RLC	integrin subunit alpha 9	ITGA9	82	4	5.53659	0.0078482	0.0511046
hsa04010	MAPK signaling pathway	CACNB2	CACNLB2|CAVB2|MYSB	calcium channel, voltage-dependent, beta 2 subunit	CACNB2	255	7	3.11569	0.0109745	0.0614575
hsa04010	MAPK signaling pathway	TGFB2	LDS4|TGF-beta2	transforming growth factor beta 2	TGFB2	255	7	3.11569	0.0109745	0.0614575
hsa04010	MAPK signaling pathway	FLNC	ABP-280|ABP280A|ABPA|ABPL|FLN2|MFM5|MPD4	filamin C	FLNA	255	7	3.11569	0.0109745	0.0614575
hsa04010	MAPK signaling pathway	HSPB1	CMT2F|HEL-S-102|HMN2B|HS.76067|HSP27|HSP28|Hsp25|SRP27	heat shock protein family B (small) member 1	HSPB1	255	7	3.11569	0.0109745	0.0614575
hsa04010	MAPK signaling pathway	DUSP16	MKP-7|MKP7	dual specificity phosphatase 16	DUSP	255	7	3.11569	0.0109745	0.0614575
hsa04010	MAPK signaling pathway	HSPA1A	HEL-S-103|HSP70-1|HSP70-1A|HSP70.1|HSP70I|HSP72|HSPA1	heat shock protein family A (Hsp70) member 1A	HSPA1_8	255	7	3.11569	0.0109745	0.0614575
hsa04010	MAPK signaling pathway	HSPA1B	HSP70-1B|HSP70-2|HSP70.2	heat shock protein family A (Hsp70) member 1B	HSPA1_8	255	7	3.11569	0.0109745	0.0614575
hsa00360	Phenylalanine metabolism	AOC3	HPAO|SSAO|VAP-1|VAP1	amine oxidase, copper containing 3	AOC3	17	2	13.3529	0.012333	0.0664087
hsa00360	Phenylalanine metabolism	HPD	4-HPPD|4HPPD|GLOD3|HPPDASE|PPD	4-hydroxyphenylpyruvate dioxygenase	HPD	17	2	13.3529	0.012333	0.0664087
hsa05146	Amoebiasis	HSPB1	CMT2F|HEL-S-102|HMN2B|HS.76067|HSP27|HSP28|Hsp25|SRP27	heat shock protein family B (small) member 1	HSPB1	100	4	4.54	0.0149103	0.0734071
hsa05146	Amoebiasis	LAMA2	LAMM	laminin subunit alpha 2	LAMA1_2	100	4	4.54	0.0149103	0.0734071
hsa05146	Amoebiasis	ACTN2	CMD1AA|CMH23	actinin alpha 2	ACTN	100	4	4.54	0.0149103	0.0734071
hsa05146	Amoebiasis	TGFB2	LDS4|TGF-beta2	transforming growth factor beta 2	TGFB2	100	4	4.54	0.0149103	0.0734071
hsa05134	Legionellosis	VCP	ALS14|CMT2Y|HEL-220|HEL-S-70|IBMPFD|IBMPFD1|TERA|p97	valosin containing protein	VCP	55	3	6.19091	0.0154679	0.0734071
hsa05134	Legionellosis	HSPA1A	HEL-S-103|HSP70-1|HSP70-1A|HSP70.1|HSP70I|HSP72|HSPA1	heat shock protein family A (Hsp70) member 1A	HSPA1_8	55	3	6.19091	0.0154679	0.0734071
hsa05134	Legionellosis	HSPA1B	HSP70-1B|HSP70-2|HSP70.2	heat shock protein family A (Hsp70) member 1B	HSPA1_8	55	3	6.19091	0.0154679	0.0734071
hsa00140	Steroid hormone biosynthesis	AKR1C2	AKR1C-pseudo|BABP|DD|DD-2|DD/BABP|DD2|DDH2|HAKRD|HBAB|MCDR2|SRXY8|TDD	aldo-keto reductase family 1, member C2	AKR1C2	58	3	5.87069	0.0176793	0.0798422
hsa00140	Steroid hormone biosynthesis	AKR1C1	2-ALPHA-HSD|20-ALPHA-HSD|C9|DD1|DD1/DD2|DDH|DDH1|H-37|HAKRC|HBAB|MBAB	aldo-keto reductase family 1, member C1	AKR1C1	58	3	5.87069	0.0176793	0.0798422
hsa00140	Steroid hormone biosynthesis	CYP1A1	AHH|AHRR|CP11|CYP1|CYPIA1|P1-450|P450-C|P450DX	cytochrome P450 family 1 subfamily A member 1	CYP1A1	58	3	5.87069	0.0176793	0.0798422
hsa04141	Protein processing in endoplasmic reticulum	VCP	ALS14|CMT2Y|HEL-220|HEL-S-70|IBMPFD|IBMPFD1|TERA|p97	valosin containing protein	VCP	169	5	3.35799	0.021663	0.0905321
hsa04141	Protein processing in endoplasmic reticulum	HSPA1A	HEL-S-103|HSP70-1|HSP70-1A|HSP70.1|HSP70I|HSP72|HSPA1	heat shock protein family A (Hsp70) member 1A	HSPA1_8	169	5	3.35799	0.021663	0.0905321
hsa04141	Protein processing in endoplasmic reticulum	HSPA1B	HSP70-1B|HSP70-2|HSP70.2	heat shock protein family A (Hsp70) member 1B	HSPA1_8	169	5	3.35799	0.021663	0.0905321
hsa04141	Protein processing in endoplasmic reticulum	DNAJB1	HSPF1|Hdj1|Hsp40|RSPH16B|Sis1	DnaJ heat shock protein family (Hsp40) member B1	DNAJB1	169	5	3.35799	0.021663	0.0905321
hsa04141	Protein processing in endoplasmic reticulum	BAG2	BAG-2|dJ417I1.2	BCL2 associated athanogene 2	BAG2	169	5	3.35799	0.021663	0.0905321
hsa05145	Toxoplasmosis	HSPA1A	HEL-S-103|HSP70-1|HSP70-1A|HSP70.1|HSP70I|HSP72|HSPA1	heat shock protein family A (Hsp70) member 1A	HSPA1_8	118	4	3.84746	0.0250186	0.0986648
hsa05145	Toxoplasmosis	HSPA1B	HSP70-1B|HSP70-2|HSP70.2	heat shock protein family A (Hsp70) member 1B	HSPA1_8	118	4	3.84746	0.0250186	0.0986648
hsa05145	Toxoplasmosis	LAMA2	LAMM	laminin subunit alpha 2	LAMA1_2	118	4	3.84746	0.0250186	0.0986648
hsa05145	Toxoplasmosis	TGFB2	LDS4|TGF-beta2	transforming growth factor beta 2	TGFB2	118	4	3.84746	0.0250186	0.0986648
hsa00760	Nicotinate and nicotinamide metabolism	ENPP1	ARHR2|COLED|M6S1|NPP1|NPPS|PC-1|PCA1|PDNP1	ectonucleotide pyrophosphatase/phosphodiesterase 1	ENPP1_3	29	2	7.82759	0.0312078	0.119701
hsa00760	Nicotinate and nicotinamide metabolism	AOX1	AO|AOH1	aldehyde oxidase 1	AOX	29	2	7.82759	0.0312078	0.119701
hsa00410	beta-Alanine metabolism	AOC3	HPAO|SSAO|VAP-1|VAP1	amine oxidase, copper containing 3	AOC3	31	2	7.32258	0.035016	0.130726
hsa00410	beta-Alanine metabolism	ALDH1B1	ALDH5|ALDHX	aldehyde dehydrogenase 1 family member B1	E1.2.1.3	31	2	7.32258	0.035016	0.130726
hsa04260	Cardiac muscle contraction	CACNB2	CACNLB2|CAVB2|MYSB	calcium channel, voltage-dependent, beta 2 subunit	CACNB2	78	3	4.36538	0.036647	0.131553
hsa04260	Cardiac muscle contraction	ACTC1	ACTC|ASD5|CMD1R|CMH11|LVNC4	actin, alpha, cardiac muscle 1	ACTC1	78	3	4.36538	0.036647	0.131553
hsa04260	Cardiac muscle contraction	ATP1A2	FHM2|MHP2	ATPase, Na+/K+ transporting, alpha 2 polypeptide	ATP1A	78	3	4.36538	0.036647	0.131553
hsa04810	Regulation of actin cytoskeleton	ITGA7	-	integrin subunit alpha 7	ITGA7	214	5	2.65187	0.0495446	0.163238
hsa04810	Regulation of actin cytoskeleton	ITGA9	ALPHA-RLC|ITGA4L|RLC	integrin subunit alpha 9	ITGA9	214	5	2.65187	0.0495446	0.163238
hsa04810	Regulation of actin cytoskeleton	CHRM4	HM4|M4R	cholinergic receptor, muscarinic 4	CHRM4	214	5	2.65187	0.0495446	0.163238
hsa04810	Regulation of actin cytoskeleton	PIP5K1C	LCCS3|PIP5K-GAMMA|PIP5K1-gamma|PIP5Kgamma	phosphatidylinositol-4-phosphate 5-kinase, type I, gamma	PIP5K	214	5	2.65187	0.0495446	0.163238
hsa04810	Regulation of actin cytoskeleton	ACTN2	CMD1AA|CMH23	actinin alpha 2	ACTN	214	5	2.65187	0.0495446	0.163238
hsa04970	Salivary secretion	ADRA1D	ADRA1|ADRA1A|ADRA1R|ALPHA1|DAR|dJ779E11.2	adrenoceptor alpha 1D	ADRA1D	89	3	3.82584	0.0501374	0.163238
hsa04970	Salivary secretion	RYR3	RYR-3	ryanodine receptor 3	RYR3	89	3	3.82584	0.0501374	0.163238
hsa04970	Salivary secretion	ATP1A2	FHM2|MHP2	ATPase, Na+/K+ transporting, alpha 2 polypeptide	ATP1A	89	3	3.82584	0.0501374	0.163238
hsa04960	Aldosterone-regulated sodium reabsorption	SCNN1B	BESC1|ENaCb|ENaCbeta|SCNEB	sodium channel, non voltage gated 1 beta subunit	SCNN1B	39	2	5.82051	0.0518598	0.165008
hsa04960	Aldosterone-regulated sodium reabsorption	ATP1A2	FHM2|MHP2	ATPase, Na+/K+ transporting, alpha 2 polypeptide	ATP1A	39	2	5.82051	0.0518598	0.165008
hsa00750	Vitamin B6 metabolism	AOX1	AO|AOH1	aldehyde oxidase 1	AOX	6	1	18.9167	0.0604586	0.185258
hsa04915	Estrogen signaling pathway	HSPA1A	HEL-S-103|HSP70-1|HSP70-1A|HSP70.1|HSP70I|HSP72|HSPA1	heat shock protein family A (Hsp70) member 1A	HSPA1_8	99	3	3.43939	0.0641725	0.185258
hsa04915	Estrogen signaling pathway	HSPA1B	HSP70-1B|HSP70-2|HSP70.2	heat shock protein family A (Hsp70) member 1B	HSPA1_8	99	3	3.43939	0.0641725	0.185258
hsa04915	Estrogen signaling pathway	CREB5	CRE-BPA|CREB-5	cAMP responsive element binding protein 5	CREB5	99	3	3.43939	0.0641725	0.185258
hsa04080	Neuroactive ligand-receptor interaction	CHRM4	HM4|M4R	cholinergic receptor, muscarinic 4	CHRM4	305	6	2.23279	0.0648403	0.185258
hsa04080	Neuroactive ligand-receptor interaction	ADRA1D	ADRA1|ADRA1A|ADRA1R|ALPHA1|DAR|dJ779E11.2	adrenoceptor alpha 1D	ADRA1D	305	6	2.23279	0.0648403	0.185258
hsa04080	Neuroactive ligand-receptor interaction	ADRA2C	ADRA2L2|ADRA2RL2|ADRARL2|ALPHA2CAR	adrenoceptor alpha 2C	ADRA2C	305	6	2.23279	0.0648403	0.185258
hsa04080	Neuroactive ligand-receptor interaction	NPY1R	NPY1-R|NPYR	neuropeptide Y receptor Y1	NPY1R	305	6	2.23279	0.0648403	0.185258
hsa04080	Neuroactive ligand-receptor interaction	P2RY14	BPR105|GPR105|P2Y14	purinergic receptor P2Y, G-protein coupled, 14	P2RY14	305	6	2.23279	0.0648403	0.185258
hsa04080	Neuroactive ligand-receptor interaction	S1PR3	EDG-3|EDG3|LPB3|S1P3	sphingosine-1-phosphate receptor 3	S1PR3	305	6	2.23279	0.0648403	0.185258
hsa04022	cGMP - PKG signaling pathway	ADRA1D	ADRA1|ADRA1A|ADRA1R|ALPHA1|DAR|dJ779E11.2	adrenoceptor alpha 1D	ADRA1D	167	4	2.71856	0.0692325	0.19005
hsa04022	cGMP - PKG signaling pathway	ADRA2C	ADRA2L2|ADRA2RL2|ADRARL2|ALPHA2CAR	adrenoceptor alpha 2C	ADRA2C	167	4	2.71856	0.0692325	0.19005
hsa04022	cGMP - PKG signaling pathway	ATP1A2	FHM2|MHP2	ATPase, Na+/K+ transporting, alpha 2 polypeptide	ATP1A	167	4	2.71856	0.0692325	0.19005
hsa04022	cGMP - PKG signaling pathway	CREB5	CRE-BPA|CREB-5	cAMP responsive element binding protein 5	CREB5	167	4	2.71856	0.0692325	0.19005
hsa00280	Valine, leucine and isoleucine degradation	ALDH1B1	ALDH5|ALDHX	aldehyde dehydrogenase 1 family member B1	E1.2.1.3	48	2	4.72917	0.0734754	0.197818
hsa00280	Valine, leucine and isoleucine degradation	AOX1	AO|AOH1	aldehyde oxidase 1	AOX	48	2	4.72917	0.0734754	0.197818
hsa05144	Malaria	ACKR1	CCBP1|CD234|DARC|Dfy|FY|GPD|GpFy|WBCQ1	atypical chemokine receptor 1 (Duffy blood group)	FY	49	2	4.63265	0.0760276	0.200828
hsa05144	Malaria	TGFB2	LDS4|TGF-beta2	transforming growth factor beta 2	TGFB2	49	2	4.63265	0.0760276	0.200828
hsa04144	Endocytosis	TGFB2	LDS4|TGF-beta2	transforming growth factor beta 2	TGFB2	259	5	2.19112	0.0915374	0.22219
hsa04144	Endocytosis	PIP5K1C	LCCS3|PIP5K-GAMMA|PIP5K1-gamma|PIP5Kgamma	phosphatidylinositol-4-phosphate 5-kinase, type I, gamma	PIP5K	259	5	2.19112	0.0915374	0.22219
hsa04144	Endocytosis	AMPH	AMPH1	amphiphysin	AMPH	259	5	2.19112	0.0915374	0.22219
hsa04144	Endocytosis	HSPA1A	HEL-S-103|HSP70-1|HSP70-1A|HSP70.1|HSP70I|HSP72|HSPA1	heat shock protein family A (Hsp70) member 1A	HSPA1_8	259	5	2.19112	0.0915374	0.22219
hsa04144	Endocytosis	HSPA1B	HSP70-1B|HSP70-2|HSP70.2	heat shock protein family A (Hsp70) member 1B	HSPA1_8	259	5	2.19112	0.0915374	0.22219
hsa00500	Starch and sucrose metabolism	PYGB	GPBB	phosphorylase, glycogen		56	2	4.05357	0.0946207	0.22219
hsa00500	Starch and sucrose metabolism	ENPP1	ARHR2|COLED|M6S1|NPP1|NPPS|PC-1|PCA1|PDNP1	ectonucleotide pyrophosphatase/phosphodiesterase 1	ENPP1_3	56	2	4.05357	0.0946207	0.22219
hsa05150	Staphylococcus aureus infection	CFD	ADIPSIN|ADN|DF|PFD	complement factor D (adipsin)	CFD	56	2	4.05357	0.0946207	0.22219
hsa05150	Staphylococcus aureus infection	C4B	C4B1|C4B12|C4B2|C4B3|C4B5|C4BD|C4B_2|C4F|CH|CO4|CPAMD3	complement component 4B (Chido blood group)	C4	56	2	4.05357	0.0946207	0.22219
hsa04151	PI3K-Akt signaling pathway	LAMA2	LAMM	laminin subunit alpha 2	LAMA1_2	341	6	1.99707	0.0960177	0.22219
hsa04151	PI3K-Akt signaling pathway	TNXB	EDS3|HXBL|TENX|TN-X|TNX|TNXB1|TNXB2|TNXBS|VUR8|XB|XBS	tenascin XB	TN	341	6	1.99707	0.0960177	0.22219
hsa04151	PI3K-Akt signaling pathway	ITGA7	-	integrin subunit alpha 7	ITGA7	341	6	1.99707	0.0960177	0.22219
hsa04151	PI3K-Akt signaling pathway	ITGA9	ALPHA-RLC|ITGA4L|RLC	integrin subunit alpha 9	ITGA9	341	6	1.99707	0.0960177	0.22219
hsa04151	PI3K-Akt signaling pathway	DDIT4	Dig2|REDD-1|REDD1	DNA damage inducible transcript 4	DDIT4	341	6	1.99707	0.0960177	0.22219
hsa04151	PI3K-Akt signaling pathway	CREB5	CRE-BPA|CREB-5	cAMP responsive element binding protein 5	CREB5	341	6	1.99707	0.0960177	0.22219
hsa00130	Ubiquinone and other terpenoid-quinone biosynthesis	HPD	4-HPPD|4HPPD|GLOD3|HPPDASE|PPD	4-hydroxyphenylpyruvate dioxygenase	HPD	11	1	10.3182	0.101358	0.232626
hsa05169	Epstein-Barr virus infection	HSPA1A	HEL-S-103|HSP70-1|HSP70-1A|HSP70.1|HSP70I|HSP72|HSPA1	heat shock protein family A (Hsp70) member 1A	HSPA1_8	202	4	2.24752	0.115105	0.255789
hsa05169	Epstein-Barr virus infection	HSPA1B	HSP70-1B|HSP70-2|HSP70.2	heat shock protein family A (Hsp70) member 1B	HSPA1_8	202	4	2.24752	0.115105	0.255789
hsa05169	Epstein-Barr virus infection	HSPB1	CMT2F|HEL-S-102|HMN2B|HS.76067|HSP27|HSP28|Hsp25|SRP27	heat shock protein family B (small) member 1	HSPB1	202	4	2.24752	0.115105	0.255789
hsa05169	Epstein-Barr virus infection	POLR2D	HSRBP4|HSRPB4|RBP4|RPB16	polymerase (RNA) II (DNA directed) polypeptide D	RPB4	202	4	2.24752	0.115105	0.255789
hsa04213	Longevity regulating pathway - multiple species	HSPA1A	HEL-S-103|HSP70-1|HSP70-1A|HSP70.1|HSP70I|HSP72|HSPA1	heat shock protein family A (Hsp70) member 1A	HSPA1_8	64	2	3.54688	0.11722	0.256419
hsa04213	Longevity regulating pathway - multiple species	HSPA1B	HSP70-1B|HSP70-2|HSP70.2	heat shock protein family A (Hsp70) member 1B	HSPA1_8	64	2	3.54688	0.11722	0.256419
hsa00830	Retinol metabolism	AOX1	AO|AOH1	aldehyde oxidase 1	AOX	65	2	3.49231	0.120131	0.258744
hsa00830	Retinol metabolism	CYP1A1	AHH|AHRR|CP11|CYP1|CYPIA1|P1-450|P450-C|P450DX	cytochrome P450 family 1 subfamily A member 1	CYP1A1	65	2	3.49231	0.120131	0.258744
hsa05162	Measles	CD209	CDSIGN|CLEC4L|DC-SIGN|DC-SIGN1	CD209 molecule	CD209	136	3	2.50368	0.128719	0.270987
hsa05162	Measles	HSPA1A	HEL-S-103|HSP70-1|HSP70-1A|HSP70.1|HSP70I|HSP72|HSPA1	heat shock protein family A (Hsp70) member 1A	HSPA1_8	136	3	2.50368	0.128719	0.270987
hsa05162	Measles	HSPA1B	HSP70-1B|HSP70-2|HSP70.2	heat shock protein family A (Hsp70) member 1B	HSPA1_8	136	3	2.50368	0.128719	0.270987
hsa04918	Thyroid hormone synthesis	CREB5	CRE-BPA|CREB-5	cAMP responsive element binding protein 5	CREB5	71	2	3.19718	0.137944	0.286107
hsa04918	Thyroid hormone synthesis	ATP1A2	FHM2|MHP2	ATPase, Na+/K+ transporting, alpha 2 polypeptide	ATP1A	71	2	3.19718	0.137944	0.286107
hsa00980	Metabolism of xenobiotics by cytochrome P450	CYP1A1	AHH|AHRR|CP11|CYP1|CYPIA1|P1-450|P450-C|P450DX	cytochrome P450 family 1 subfamily A member 1	CYP1A1	73	2	3.10959	0.144001	0.294308
hsa00980	Metabolism of xenobiotics by cytochrome P450	AKR1C1	2-ALPHA-HSD|20-ALPHA-HSD|C9|DD1|DD1/DD2|DDH|DDH1|H-37|HAKRC|HBAB|MBAB	aldo-keto reductase family 1, member C1	AKR1C1	73	2	3.10959	0.144001	0.294308
hsa04520	Adherens junction	SORBS1	CAP|FLAF2|R85FL|SH3D5|SH3P12|SORB1	sorbin and SH3 domain containing 1	SORBS1	74	2	3.06757	0.147049	0.296119
hsa04520	Adherens junction	ACTN2	CMD1AA|CMH23	actinin alpha 2	ACTN	74	2	3.06757	0.147049	0.296119
hsa00910	Nitrogen metabolism	CA3	CAIII|Car3	carbonic anhydrase III	E4.2.1.1	17	1	6.67647	0.148059	0.296119
hsa00770	Pantothenate and CoA biosynthesis	ENPP1	ARHR2|COLED|M6S1|NPP1|NPPS|PC-1|PCA1|PDNP1	ectonucleotide pyrophosphatase/phosphodiesterase 1	ENPP1_3	18	1	6.30556	0.1556	0.305977
hsa04612	Antigen processing and presentation	HSPA1A	HEL-S-103|HSP70-1|HSP70-1A|HSP70.1|HSP70I|HSP72|HSPA1	heat shock protein family A (Hsp70) member 1A	HSPA1_8	77	2	2.94805	0.156267	0.305977
hsa04612	Antigen processing and presentation	HSPA1B	HSP70-1B|HSP70-2|HSP70.2	heat shock protein family A (Hsp70) member 1B	HSPA1_8	77	2	2.94805	0.156267	0.305977
hsa04610	Complement and coagulation cascades	CFD	ADIPSIN|ADN|DF|PFD	complement factor D (adipsin)	CFD	79	2	2.87342	0.16247	0.313734
hsa04610	Complement and coagulation cascades	C4B	C4B1|C4B12|C4B2|C4B3|C4B5|C4BD|C4B_2|C4F|CH|CO4|CPAMD3	complement component 4B (Chido blood group)	C4	79	2	2.87342	0.16247	0.313734
hsa05204	Chemical carcinogenesis	CYP1A1	AHH|AHRR|CP11|CYP1|CYPIA1|P1-450|P450-C|P450DX	cytochrome P450 family 1 subfamily A member 1	CYP1A1	82	2	2.76829	0.17185	0.327334
hsa05204	Chemical carcinogenesis	AKR1C2	AKR1C-pseudo|BABP|DD|DD-2|DD/BABP|DD2|DDH2|HAKRD|HBAB|MCDR2|SRXY8|TDD	aldo-keto reductase family 1, member C2	AKR1C2	82	2	2.76829	0.17185	0.327334
hsa04350	TGF-beta signaling pathway	TGFB2	LDS4|TGF-beta2	transforming growth factor beta 2	TGFB2	84	2	2.70238	0.17815	0.334779
hsa04350	TGF-beta signaling pathway	BAMBI	NMA	BMP and activin membrane-bound inhibitor	BAMBI	84	2	2.70238	0.17815	0.334779
hsa04911	Insulin secretion	ATP1A2	FHM2|MHP2	ATPase, Na+/K+ transporting, alpha 2 polypeptide	ATP1A	85	2	2.67059	0.181313	0.336209
hsa04911	Insulin secretion	CREB5	CRE-BPA|CREB-5	cAMP responsive element binding protein 5	CREB5	85	2	2.67059	0.181313	0.336209
hsa04964	Proximal tubule bicarbonate reclamation	ATP1A2	FHM2|MHP2	ATPase, Na+/K+ transporting, alpha 2 polypeptide	ATP1A	23	1	4.93478	0.192297	0.354231
hsa00340	Histidine metabolism	ALDH1B1	ALDH5|ALDHX	aldehyde dehydrogenase 1 family member B1	E1.2.1.3	24	1	4.72917	0.19944	0.364988
hsa04666	Fc gamma R-mediated phagocytosis	PIP5K1C	LCCS3|PIP5K-GAMMA|PIP5K1-gamma|PIP5Kgamma	phosphatidylinositol-4-phosphate 5-kinase, type I, gamma	PIP5K	93	2	2.44086	0.206862	0.373686
hsa04666	Fc gamma R-mediated phagocytosis	AMPH	AMPH1	amphiphysin	AMPH	93	2	2.44086	0.206862	0.373686
hsa05164	Influenza A	DNAJB1	HSPF1|Hdj1|Hsp40|RSPH16B|Sis1	DnaJ heat shock protein family (Hsp40) member B1	DNAJB1	175	3	1.94571	0.212202	0.376055
hsa05164	Influenza A	HSPA1A	HEL-S-103|HSP70-1|HSP70-1A|HSP70.1|HSP70I|HSP72|HSPA1	heat shock protein family A (Hsp70) member 1A	HSPA1_8	175	3	1.94571	0.212202	0.376055
hsa05164	Influenza A	HSPA1B	HSP70-1B|HSP70-2|HSP70.2	heat shock protein family A (Hsp70) member 1B	HSPA1_8	175	3	1.94571	0.212202	0.376055
hsa00053	Ascorbate and aldarate metabolism	ALDH1B1	ALDH5|ALDHX	aldehyde dehydrogenase 1 family member B1	E1.2.1.3	27	1	4.2037	0.220486	0.388277
hsa04922	Glucagon signaling pathway	CREB5	CRE-BPA|CREB-5	cAMP responsive element binding protein 5	CREB5	101	2	2.24752	0.232724	0.399771
hsa04922	Glucagon signaling pathway	PYGB	GPBB	phosphorylase, glycogen		101	2	2.24752	0.232724	0.399771
hsa05231	Choline metabolism in cancer	PIP5K1C	LCCS3|PIP5K-GAMMA|PIP5K1-gamma|PIP5Kgamma	phosphatidylinositol-4-phosphate 5-kinase, type I, gamma	PIP5K	101	2	2.24752	0.232724	0.399771
hsa05231	Choline metabolism in cancer	SLC22A3	EMT|EMTH|OCT3	solute carrier family 22 (organic cation transporter), member 3	SLC22A3	101	2	2.24752	0.232724	0.399771
hsa00512	Mucin type O-glycan biosynthesis	GALNT16	GALNACT16|GALNTL1|GalNAc-T16	polypeptide N-acetylgalactosaminyltransferase 16	GALNT	31	1	3.66129	0.247675	0.42286
hsa03020	RNA polymerase	POLR2D	HSRBP4|HSRPB4|RBP4|RPB16	polymerase (RNA) II (DNA directed) polypeptide D	RPB4	32	1	3.54688	0.254321	0.431575
hsa04931	Insulin resistance	PYGB	GPBB	phosphorylase, glycogen		109	2	2.08257	0.258731	0.4338
hsa04931	Insulin resistance	CREB5	CRE-BPA|CREB-5	cAMP responsive element binding protein 5	CREB5	109	2	2.08257	0.258731	0.4338
hsa04725	Cholinergic synapse	CHRM4	HM4|M4R	cholinergic receptor, muscarinic 4	CHRM4	111	2	2.04505	0.265238	0.43609
hsa04725	Cholinergic synapse	CREB5	CRE-BPA|CREB-5	cAMP responsive element binding protein 5	CREB5	111	2	2.04505	0.265238	0.43609
hsa04024	cAMP signaling pathway	NPY1R	NPY1-R|NPYR	neuropeptide Y receptor Y1	NPY1R	199	3	1.71106	0.267884	0.43609
hsa04024	cAMP signaling pathway	CREB5	CRE-BPA|CREB-5	cAMP responsive element binding protein 5	CREB5	199	3	1.71106	0.267884	0.43609
hsa04024	cAMP signaling pathway	ATP1A2	FHM2|MHP2	ATPase, Na+/K+ transporting, alpha 2 polypeptide	ATP1A	199	3	1.71106	0.267884	0.43609
hsa05020	Prion diseases	HSPA1A	HEL-S-103|HSP70-1|HSP70-1A|HSP70.1|HSP70I|HSP72|HSPA1	heat shock protein family A (Hsp70) member 1A	HSPA1_8	35	1	3.24286	0.273902	0.44331
hsa00040	Pentose and glucuronate interconversions	ALDH1B1	ALDH5|ALDHX	aldehyde dehydrogenase 1 family member B1	E1.2.1.3	36	1	3.15278	0.280313	0.451078
hsa00260	Glycine, serine and threonine metabolism	AOC3	HPAO|SSAO|VAP-1|VAP1	amine oxidase, copper containing 3	AOC3	40	1	2.8375	0.305384	0.488615
hsa00620	Pyruvate metabolism	ALDH1B1	ALDH5|ALDHX	aldehyde dehydrogenase 1 family member B1	E1.2.1.3	41	1	2.76829	0.311512	0.495588
hsa04270	Vascular smooth muscle contraction	ADRA1D	ADRA1|ADRA1A|ADRA1R|ALPHA1|DAR|dJ779E11.2	adrenoceptor alpha 1D	ADRA1D	130	2	1.74615	0.326688	0.507614
hsa04270	Vascular smooth muscle contraction	ACTG2	ACT|ACTA3|ACTE|ACTL3|ACTSG|VSCM	actin, gamma 2, smooth muscle, enteric	ACTG2	130	2	1.74615	0.326688	0.507614
hsa00071	Fatty acid degradation	ALDH1B1	ALDH5|ALDHX	aldehyde dehydrogenase 1 family member B1	E1.2.1.3	44	1	2.57955	0.329569	0.507614
hsa02010	ABC transporters	ABCG1	ABC8|WHITE1	ATP binding cassette subfamily G member 1	ABCG1	44	1	2.57955	0.329569	0.507614
hsa04962	Vasopressin-regulated water reabsorption	CREB5	CRE-BPA|CREB-5	cAMP responsive element binding protein 5	CREB5	44	1	2.57955	0.329569	0.507614
hsa00565	Ether lipid metabolism	ENPP6	NPP6	ectonucleotide pyrophosphatase/phosphodiesterase 6	ENPP6	45	1	2.52222	0.335481	0.507614
hsa04973	Carbohydrate digestion and absorption	ATP1A2	FHM2|MHP2	ATPase, Na+/K+ transporting, alpha 2 polypeptide	ATP1A	45	1	2.52222	0.335481	0.507614
hsa03040	Spliceosome	HSPA1A	HEL-S-103|HSP70-1|HSP70-1A|HSP70.1|HSP70I|HSP72|HSPA1	heat shock protein family A (Hsp70) member 1A	HSPA1_8	134	2	1.69403	0.339459	0.507614
hsa03040	Spliceosome	HSPA1B	HSP70-1B|HSP70-2|HSP70.2	heat shock protein family A (Hsp70) member 1B	HSPA1_8	134	2	1.69403	0.339459	0.507614
hsa04068	FoxO signaling pathway	TGFB2	LDS4|TGF-beta2	transforming growth factor beta 2	TGFB2	134	2	1.69403	0.339459	0.507614
hsa04068	FoxO signaling pathway	FOXG1	BF1|BF2|FHKL3|FKH2|FKHL1|FKHL2|FKHL3|FKHL4|FOXG1A|FOXG1B|FOXG1C|HBF-1|HBF-2|HBF-3|HBF-G2|HBF2|HFK1|HFK2|HFK3|KHL2|QIN	forkhead box G1	FOXG	134	2	1.69403	0.339459	0.507614
hsa05322	Systemic lupus erythematosus	C4B	C4B1|C4B12|C4B2|C4B3|C4B5|C4BD|C4B_2|C4F|CH|CO4|CPAMD3	complement component 4B (Chido blood group)	C4	135	2	1.68148	0.342639	0.507614
hsa05322	Systemic lupus erythematosus	ACTN2	CMD1AA|CMH23	actinin alpha 2	ACTN	135	2	1.68148	0.342639	0.507614
hsa04961	Endocrine and other factor-regulated calcium reabsorption	ATP1A2	FHM2|MHP2	ATPase, Na+/K+ transporting, alpha 2 polypeptide	ATP1A	47	1	2.41489	0.347145	0.511582
hsa04910	Insulin signaling pathway	PYGB	GPBB	phosphorylase, glycogen		139	2	1.63309	0.355305	0.518153
hsa04910	Insulin signaling pathway	SORBS1	CAP|FLAF2|R85FL|SH3D5|SH3P12|SORB1	sorbin and SH3 domain containing 1	SORBS1	139	2	1.63309	0.355305	0.518153
hsa05030	Cocaine addiction	CREB5	CRE-BPA|CREB-5	cAMP responsive element binding protein 5	CREB5	49	1	2.31633	0.358602	0.518414
hsa00330	Arginine and proline metabolism	ALDH1B1	ALDH5|ALDHX	aldehyde dehydrogenase 1 family member B1	E1.2.1.3	50	1	2.27	0.364253	0.518414
hsa04913	Ovarian Steroidogenesis	CYP1A1	AHH|AHRR|CP11|CYP1|CYPIA1|P1-450|P450-C|P450DX	cytochrome P450 family 1 subfamily A member 1	CYP1A1	50	1	2.27	0.364253	0.518414
hsa04514	Cell adhesion molecules (CAMs)	ITGA9	ALPHA-RLC|ITGA4L|RLC	integrin subunit alpha 9	ITGA9	142	2	1.59859	0.364741	0.518414
hsa04514	Cell adhesion molecules (CAMs)	CD34	-	CD34 molecule	CD34	142	2	1.59859	0.364741	0.518414
hsa04978	Mineral absorption	ATP1A2	FHM2|MHP2	ATPase, Na+/K+ transporting, alpha 2 polypeptide	ATP1A	51	1	2.22549	0.369854	0.523026
hsa00310	Lysine degradation	ALDH1B1	ALDH5|ALDHX	aldehyde dehydrogenase 1 family member B1	E1.2.1.3	52	1	2.18269	0.375405	0.525499
hsa05161	Hepatitis B	TGFB2	LDS4|TGF-beta2	transforming growth factor beta 2	TGFB2	146	2	1.55479	0.377233	0.525499
hsa05161	Hepatitis B	CREB5	CRE-BPA|CREB-5	cAMP responsive element binding protein 5	CREB5	146	2	1.55479	0.377233	0.525499
hsa04923	Regulation of lipolysis in adipocyte	NPY1R	NPY1-R|NPYR	neuropeptide Y receptor Y1	NPY1R	56	1	2.02679	0.397116	0.550458
hsa00561	Glycerolipid metabolism	ALDH1B1	ALDH5|ALDHX	aldehyde dehydrogenase 1 family member B1	E1.2.1.3	59	1	1.92373	0.412895	0.562738
hsa05416	Viral myocarditis	LAMA2	LAMM	laminin subunit alpha 2	LAMA1_2	59	1	1.92373	0.412895	0.562738
hsa04921	Oxytocin signaling pathway	RYR3	RYR-3	ryanodine receptor 3	RYR3	158	2	1.43671	0.414014	0.562738
hsa04921	Oxytocin signaling pathway	CACNB2	CACNLB2|CAVB2|MYSB	calcium channel, voltage-dependent, beta 2 subunit	CACNB2	158	2	1.43671	0.414014	0.562738
hsa04150	mTOR signaling pathway	DDIT4	Dig2|REDD-1|REDD1	DNA damage inducible transcript 4	DDIT4	60	1	1.89167	0.418061	0.565493
hsa04370	VEGF signaling pathway	HSPB1	CMT2F|HEL-S-102|HMN2B|HS.76067|HSP27|HSP28|Hsp25|SRP27	heat shock protein family B (small) member 1	HSPB1	61	1	1.86066	0.42318	0.569666
hsa05210	Colorectal cancer	TGFB2	LDS4|TGF-beta2	transforming growth factor beta 2	TGFB2	62	1	1.83065	0.428254	0.573738
hsa05321	Inflammatiory bowel disease (IBD)	TGFB2	LDS4|TGF-beta2	transforming growth factor beta 2	TGFB2	65	1	1.74615	0.443206	0.589053
hsa04720	Long-term potentiation	PPP1R1A	I1|IPP1	protein phosphatase 1 regulatory inhibitor subunit 1A	PPP1R1A	66	1	1.7197	0.448101	0.589053
hsa05212	Pancreatic cancer	TGFB2	LDS4|TGF-beta2	transforming growth factor beta 2	TGFB2	66	1	1.7197	0.448101	0.589053
hsa05211	Renal cell carcinoma	TGFB2	LDS4|TGF-beta2	transforming growth factor beta 2	TGFB2	66	1	1.7197	0.448101	0.589053
hsa05031	Amphetamine addiction	CREB5	CRE-BPA|CREB-5	cAMP responsive element binding protein 5	CREB5	67	1	1.69403	0.452952	0.592648
hsa00010	Glycolysis / Gluconeogenesis	ALDH1B1	ALDH5|ALDHX	aldehyde dehydrogenase 1 family member B1	E1.2.1.3	68	1	1.66912	0.45776	0.59343
hsa00982	Drug metabolism - cytochrome P450	AOX1	AO|AOH1	aldehyde oxidase 1	AOX	69	1	1.64493	0.462525	0.59343
hsa03320	PPAR signaling pathway	SORBS1	CAP|FLAF2|R85FL|SH3D5|SH3P12|SORB1	sorbin and SH3 domain containing 1	SORBS1	69	1	1.64493	0.462525	0.59343
hsa00230	Purine metabolism	ENPP1	ARHR2|COLED|M6S1|NPP1|NPPS|PC-1|PCA1|PDNP1	ectonucleotide pyrophosphatase/phosphodiesterase 1	ENPP1_3	176	2	1.28977	0.466929	0.59343
hsa00230	Purine metabolism	POLR2D	HSRBP4|HSRPB4|RBP4|RPB16	polymerase (RNA) II (DNA directed) polypeptide D	RPB4	176	2	1.28977	0.466929	0.59343
hsa00562	Inositol phosphate metabolism	PIP5K1C	LCCS3|PIP5K-GAMMA|PIP5K1-gamma|PIP5Kgamma	phosphatidylinositol-4-phosphate 5-kinase, type I, gamma	PIP5K	71	1	1.59859	0.471928	0.59343
hsa04976	Bile secretion	ATP1A2	FHM2|MHP2	ATPase, Na+/K+ transporting, alpha 2 polypeptide	ATP1A	71	1	1.59859	0.471928	0.59343
hsa05152	Tuberculosis	CD209	CDSIGN|CLEC4L|DC-SIGN|DC-SIGN1	CD209 molecule	CD209	178	2	1.27528	0.472625	0.59343
hsa05152	Tuberculosis	TGFB2	LDS4|TGF-beta2	transforming growth factor beta 2	TGFB2	178	2	1.27528	0.472625	0.59343
hsa04020	Calcium signaling pathway	RYR3	RYR-3	ryanodine receptor 3	RYR3	180	2	1.26111	0.478282	0.593507
hsa04020	Calcium signaling pathway	ADRA1D	ADRA1|ADRA1A|ADRA1R|ALPHA1|DAR|dJ779E11.2	adrenoceptor alpha 1D	ADRA1D	180	2	1.26111	0.478282	0.593507
hsa05220	Chronic myeloid leukemia	TGFB2	LDS4|TGF-beta2	transforming growth factor beta 2	TGFB2	73	1	1.55479	0.481164	0.593507
hsa05140	Leishmaniasis	TGFB2	LDS4|TGF-beta2	transforming growth factor beta 2	TGFB2	73	1	1.55479	0.481164	0.593507
hsa04971	Gastric acid secretion	ATP1A2	FHM2|MHP2	ATPase, Na+/K+ transporting, alpha 2 polypeptide	ATP1A	74	1	1.53378	0.48572	0.596499
hsa05133	Pertussis	C4B	C4B1|C4B12|C4B2|C4B3|C4B5|C4BD|C4B_2|C4F|CH|CO4|CPAMD3	complement component 4B (Chido blood group)	C4	75	1	1.51333	0.490236	0.596672
hsa05206	MicroRNAs in cancer	TGFB2	LDS4|TGF-beta2	transforming growth factor beta 2	TGFB2	297	3	1.14646	0.494385	0.596672
hsa05206	MicroRNAs in cancer	DDIT4	Dig2|REDD-1|REDD1	DNA damage inducible transcript 4	DDIT4	297	3	1.14646	0.494385	0.596672
hsa05206	MicroRNAs in cancer	TNXB	EDS3|HXBL|TENX|TN-X|TNX|TNXB1|TNXB2|TNXBS|VUR8|XB|XBS	tenascin XB	TN	297	3	1.14646	0.494385	0.596672
hsa03018	RNA degradation	BTG3	ANA|TOB5|TOB55|TOFA	BTG family member 3	TOB	77	1	1.47403	0.499147	0.599833
hsa05016	Huntington's disease	CREB5	CRE-BPA|CREB-5	cAMP responsive element binding protein 5	CREB5	193	2	1.17617	0.514087	0.612529
hsa05016	Huntington's disease	POLR2D	HSRBP4|HSRPB4|RBP4|RPB16	polymerase (RNA) II (DNA directed) polypeptide D	RPB4	193	2	1.17617	0.514087	0.612529
hsa04925	Aldosterone synthesis and secretion	CREB5	CRE-BPA|CREB-5	cAMP responsive element binding protein 5	CREB5	81	1	1.40123	0.516497	0.612793
hsa04742	Taste transduction	SCNN1B	BESC1|ENaCb|ENaCbeta|SCNEB	sodium channel, non voltage gated 1 beta subunit	SCNN1B	83	1	1.36747	0.524941	0.620184
hsa05222	Small cell lung cancer	LAMA2	LAMM	laminin subunit alpha 2	LAMA1_2	86	1	1.31977	0.537329	0.626104
hsa05132	Salmonella infection	FLNC	ABP-280|ABP280A|ABPA|ABPL|FLN2|MFM5|MPD4	filamin C	FLNA	86	1	1.31977	0.537329	0.626104
hsa05205	Proteoglycans in cancer	FLNC	ABP-280|ABP280A|ABPA|ABPL|FLN2|MFM5|MPD4	filamin C	FLNA	203	2	1.11823	0.540456	0.626104
hsa05205	Proteoglycans in cancer	TGFB2	LDS4|TGF-beta2	transforming growth factor beta 2	TGFB2	203	2	1.11823	0.540456	0.626104
hsa04640	Hematopoietic cell lineage	CD34	-	CD34 molecule	CD34	88	1	1.28977	0.545404	0.626104
hsa05203	Viral carcinogenesis	CREB5	CRE-BPA|CREB-5	cAMP responsive element binding protein 5	CREB5	205	2	1.10732	0.545605	0.626104
hsa05203	Viral carcinogenesis	ACTN2	CMD1AA|CMH23	actinin alpha 2	ACTN	205	2	1.10732	0.545605	0.626104
hsa05215	Prostate cancer	CREB5	CRE-BPA|CREB-5	cAMP responsive element binding protein 5	CREB5	89	1	1.27528	0.549388	0.627263
hsa04974	Protein digestion and absorption	ATP1A2	FHM2|MHP2	ATPase, Na+/K+ transporting, alpha 2 polypeptide	ATP1A	90	1	1.26111	0.553336	0.627263
hsa05323	Rheumatoid arthritis	TGFB2	LDS4|TGF-beta2	transforming growth factor beta 2	TGFB2	90	1	1.26111	0.553336	0.627263
hsa04211	Longevity regulating pathway - mammal	CREB5	CRE-BPA|CREB-5	cAMP responsive element binding protein 5	CREB5	94	1	1.20745	0.568781	0.642172
hsa04713	Circadian entrainment	RYR3	RYR-3	ryanodine receptor 3	RYR3	95	1	1.19474	0.572557	0.643839
hsa04070	Phosphatidylinositol signaling system	PIP5K1C	LCCS3|PIP5K-GAMMA|PIP5K1-gamma|PIP5Kgamma	phosphatidylinositol-4-phosphate 5-kinase, type I, gamma	PIP5K	98	1	1.15816	0.583684	0.651122
hsa04972	Pancreatic secretion	ATP1A2	FHM2|MHP2	ATPase, Na+/K+ transporting, alpha 2 polypeptide	ATP1A	98	1	1.15816	0.583684	0.651122
hsa04933	AGE-RAGE signaling pathway in diabetic complications	TGFB2	LDS4|TGF-beta2	transforming growth factor beta 2	TGFB2	101	1	1.12376	0.594517	0.660574
hsa05142	Chagas disease (American trypanosomiasis)	TGFB2	LDS4|TGF-beta2	transforming growth factor beta 2	TGFB2	104	1	1.09135	0.605064	0.669636
hsa00240	Pyrimidine metabolism	POLR2D	HSRBP4|HSRPB4|RBP4|RPB16	polymerase (RNA) II (DNA directed) polypeptide D	RPB4	105	1	1.08095	0.608517	0.670806
hsa04668	TNF signaling pathway	CREB5	CRE-BPA|CREB-5	cAMP responsive element binding protein 5	CREB5	110	1	1.03182	0.625329	0.686636
hsa04670	Leukocyte transendothelial migration	ACTN2	CMD1AA|CMH23	actinin alpha 2	ACTN	118	1	0.961864	0.650717	0.708952
hsa04919	Thyroid hormone signaling pathway	ATP1A2	FHM2|MHP2	ATPase, Na+/K+ transporting, alpha 2 polypeptide	ATP1A	118	1	0.961864	0.650717	0.708952
hsa04071	Sphingolipid signaling pathway	S1PR3	EDG-3|EDG3|LPB3|S1P3	sphingosine-1-phosphate receptor 3	S1PR3	120	1	0.945833	0.656786	0.712791
hsa04152	AMPK signaling pathway	CREB5	CRE-BPA|CREB-5	cAMP responsive element binding protein 5	CREB5	124	1	0.915323	0.668606	0.720037
hsa04110	Cell cycle	TGFB2	LDS4|TGF-beta2	transforming growth factor beta 2	TGFB2	124	1	0.915323	0.668606	0.720037
hsa04728	Dopaminergic synapse	CREB5	CRE-BPA|CREB-5	cAMP responsive element binding protein 5	CREB5	129	1	0.879845	0.6828	0.732506
hsa04060	Cytokine-cytokine receptor interaction	TGFB2	LDS4|TGF-beta2	transforming growth factor beta 2	TGFB2	269	2	0.843866	0.688221	0.732707
hsa04060	Cytokine-cytokine receptor interaction	TNFRSF12A	CD266|FN14|TWEAKR	tumor necrosis factor receptor superfamily member 12A	TNFRSF12A	269	2	0.843866	0.688221	0.732707
hsa04380	Osteoclast differentiation	TGFB2	LDS4|TGF-beta2	transforming growth factor beta 2	TGFB2	132	1	0.859848	0.691019	0.732899
hsa04740	Olfactory transduction	OR5V1	6M1-21|hs6M1-21	olfactory receptor family 5 subfamily V member 1	OLFR	415	3	0.820482	0.709136	0.741128
hsa04740	Olfactory transduction	OR52E6	OR11-58	olfactory receptor family 52 subfamily E member 6	OLFR	415	3	0.820482	0.709136	0.741128
hsa04740	Olfactory transduction	OR51B6	HOR5'Beta6	olfactory receptor family 51 subfamily B member 6	OLFR	415	3	0.820482	0.709136	0.741128
hsa04530	Tight junction	ACTN2	CMD1AA|CMH23	actinin alpha 2	ACTN	139	1	0.816547	0.709365	0.741128
hsa04310	Wnt signaling pathway	BAMBI	NMA	BMP and activin membrane-bound inhibitor	BAMBI	143	1	0.793706	0.719348	0.748522
hsa04072	Phospholipase D signaling pathway	PIP5K1C	LCCS3|PIP5K-GAMMA|PIP5K1-gamma|PIP5Kgamma	phosphatidylinositol-4-phosphate 5-kinase, type I, gamma	PIP5K	144	1	0.788194	0.721789	0.748522
hsa04390	Hippo signaling pathway	TGFB2	LDS4|TGF-beta2	transforming growth factor beta 2	TGFB2	154	1	0.737013	0.745042	0.766955
hsa04145	Phagosome	CD209	CDSIGN|CLEC4L|DC-SIGN|DC-SIGN1	CD209 molecule	CD209	154	1	0.737013	0.745042	0.766955
hsa04630	Jak-STAT signaling pathway	AOX1	AO|AOH1	aldehyde oxidase 1	AOX	158	1	0.718354	0.753781	0.773109
hsa05010	Alzheimer's disease	RYR3	RYR-3	ryanodine receptor 3	RYR3	168	1	0.675595	0.774323	0.791279
hsa04360	Axon guidance	NTN1	NTN1L	netrin 1	NTN1	174	1	0.652299	0.785803	0.80009
hsa05034	Alcoholism	CREB5	CRE-BPA|CREB-5	cAMP responsive element binding protein 5	CREB5	179	1	0.634078	0.794916	0.805319
hsa05202	Transcriptional misregulation in cancers	TSPAN7	A15|CCG-B7|CD231|DXS1692E|MRX58|MXS1|TALLA-1|TM4SF2|TM4SF2b	tetraspanin 7	TSPAN7	180	1	0.630556	0.796691	0.805319
hsa05200	Pathways in cancer	LAMA2	LAMM	laminin subunit alpha 2	LAMA1_2	397	2	0.571788	0.86227	0.865361
hsa05200	Pathways in cancer	TGFB2	LDS4|TGF-beta2	transforming growth factor beta 2	TGFB2	397	2	0.571788	0.86227	0.865361
hsa05166	HTLV-I infection	TGFB2	LDS4|TGF-beta2	transforming growth factor beta 2	TGFB2	258	1	0.439922	0.896408	0.896408

## Sheet: Down Pathway Enrichment
pathway_id	pathway_name	population_mapped_id	study_mapped_id	enrichment	p_value	FDR	link
hsa04668	TNF signaling pathway	110	13	4.64606	1.76673e-05	0.00104011	www.kegg.jp/kegg-bin/show_pathway?map=hsa04668&multi_query=329%09purple/9586%09red/2920%09purple/355%09purple/3553%09purple/3569%09purple/9021%09purple/7128%09purple/2353%09purple/3726%09purple/3383%09purple/6401%09purple/5743%09purple/5290%09purple/
hsa05164	Influenza A	175	16	3.59432	3.95094e-05	0.00104011	www.kegg.jp/kegg-bin/show_pathway?map=hsa05164&multi_query=3337%09red/3303%09red/3304%09red/3304%09purple/5610%09purple/23586%09purple/64135%09purple/7098%09purple/5290%09purple/3553%09purple/3569%09purple/3576%09purple/3383%09purple/9021%09purple/3117%09purple/3126%09purple/355%09purple/91543%09purple/10625%09purple/
hsa05168	Herpes simplex infection	185	16	3.40003	7.21532e-05	0.00104011	www.kegg.jp/kegg-bin/show_pathway?map=hsa05168&multi_query=2353%09purple/7098%09purple/23586%09purple/64135%09purple/3553%09purple/3569%09purple/3434%09purple/5610%09purple/6426%09purple/6672%09purple/3117%09purple/3126%09purple/3107%09purple/9021%09purple/355%09purple/9575%09purple/
hsa04064	NF-kappa B signaling pathway	93	11	4.64991	7.33582e-05	0.00104011	www.kegg.jp/kegg-bin/show_pathway?map=hsa04064&multi_query=3553%09purple/329%09purple/23586%09purple/10673%09purple/597%09purple/3576%09purple/7128%09purple/5743%09purple/3383%09purple/2920%09purple/4616%09purple/
hsa05323	Rheumatoid arthritis	90	10	4.36809	0.00024028	0.00289064	www.kegg.jp/kegg-bin/show_pathway?map=hsa05323&multi_query=3117%09purple/3126%09purple/3383%09purple/10673%09purple/3553%09purple/3569%09purple/2353%09purple/7042%09red/51382%09purple/3576%09purple/284%09purple/
hsa05332	Graft-versus-host disease	41	6	5.7531	0.00113456	0.011581	www.kegg.jp/kegg-bin/show_pathway?map=hsa05332&multi_query=3569%09purple/3553%09purple/3117%09purple/3126%09purple/3107%09purple/355%09purple/
hsa04621	NOD-like receptor signaling pathway	57	7	4.82789	0.00115226	0.011581	www.kegg.jp/kegg-bin/show_pathway?map=hsa04621&multi_query=3576%09purple/3569%09purple/329%09purple/7128%09purple/4671%09purple/3553%09purple/2920%09purple/
hsa05144	Malaria	49	6	4.81382	0.00257518	0.0240552	www.kegg.jp/kegg-bin/show_pathway?map=hsa05144&multi_query=2532%09red/7042%09red/3576%09purple/3569%09purple/3553%09purple/7057%09purple/6401%09purple/3383%09purple/
hsa05143	African trypanosomiasis	35	5	5.61612	0.0031803	0.0280573	www.kegg.jp/kegg-bin/show_pathway?map=hsa05143&multi_query=3553%09purple/3569%09purple/355%09purple/6401%09purple/3383%09purple/
hsa05162	Measles	136	10	2.89065	0.00422748	0.0324587	www.kegg.jp/kegg-bin/show_pathway?map=hsa05162&multi_query=30835%09red/4179%09purple/5290%09purple/23586%09purple/64135%09purple/7128%09purple/3553%09purple/3569%09purple/3303%09red/3304%09red/3304%09purple/5610%09purple/355%09purple/
hsa05134	Legionellosis	55	6	4.28867	0.00433328	0.0324587	www.kegg.jp/kegg-bin/show_pathway?map=hsa05134&multi_query=7415%09red/3303%09red/3304%09red/3304%09purple/4671%09purple/3553%09purple/3569%09purple/3576%09purple/2920%09purple/
hsa05161	Hepatitis B	146	10	2.69266	0.00665695	0.0455657	www.kegg.jp/kegg-bin/show_pathway?map=hsa05161&multi_query=7042%09red/1959%09purple/1960%09purple/355%09purple/5290%09purple/3576%09purple/9586%09red/2353%09purple/7098%09purple/23586%09purple/64135%09purple/3569%09purple/
hsa04940	Type I diabetes mellitus	43	5	4.57126	0.00700069	0.0459384	www.kegg.jp/kegg-bin/show_pathway?map=hsa04940&multi_query=3117%09purple/3126%09purple/3107%09purple/355%09purple/3553%09purple/
hsa04742	Taste transduction	83	7	3.31554	0.00781152	0.0476817	www.kegg.jp/kegg-bin/show_pathway?map=hsa04742&multi_query=6338%09red/259294%09purple/259295%09purple/259296%09purple/50838%09purple/50840%09purple/259293%09purple/5136%09purple/
hsa05410	Hypertrophic cardiomyopathy (HCM)	85	7	3.23753	0.0087676	0.0476817	www.kegg.jp/kegg-bin/show_pathway?map=hsa05410&multi_query=3672%09purple/3679%09red/3680%09red/3696%09purple/1674%09red/7273%09purple/70%09red/783%09red/785%09purple/5563%09purple/7042%09red/3569%09purple/3908%09red/781%09purple/
hsa04145	Phagosome	154	10	2.55278	0.00928055	0.0476817	www.kegg.jp/kegg-bin/show_pathway?map=hsa04145&multi_query=3107%09purple/3117%09purple/3126%09purple/7037%09purple/51382%09purple/79659%09purple/2215%09purple/7057%09purple/22925%09purple/30835%09red/64581%09purple/
hsa04010	MAPK signaling pathway	255	14	2.15835	0.00954835	0.0476817	www.kegg.jp/kegg-bin/show_pathway?map=hsa04010&multi_query=783%09red/785%09purple/5922%09purple/2246%09purple/2252%09purple/5156%09purple/2353%09purple/3553%09purple/7042%09red/355%09purple/4616%09purple/2318%09red/3315%09red/5494%09purple/80824%09red/3303%09red/3304%09red/3304%09purple/3164%09purple/781%09purple/1649%09purple/
hsa05140	Leishmaniasis	73	6	3.23119	0.0147592	0.0681821	www.kegg.jp/kegg-bin/show_pathway?map=hsa05140&multi_query=3553%09purple/7042%09red/2215%09purple/5743%09purple/2353%09purple/3117%09purple/3126%09purple/
hsa04514	Cell adhesion molecules (CAMs)	142	9	2.49166	0.0149417	0.0681821	www.kegg.jp/kegg-bin/show_pathway?map=hsa04514&multi_query=965%09purple/3117%09purple/3126%09purple/3107%09purple/214%09purple/3383%09purple/3680%09red/947%09red/6401%09purple/3696%09purple/9378%09purple/
hsa04933	AGE-RAGE signaling pathway in diabetic complications	101	7	2.72465	0.0197103	0.0854105	www.kegg.jp/kegg-bin/show_pathway?map=hsa04933&multi_query=7042%09red/6401%09purple/3383%09purple/3553%09purple/3569%09purple/3576%09purple/5290%09purple/1958%09purple/
hsa05330	Allograft rejection	38	4	4.13819	0.0207601	0.0854105	www.kegg.jp/kegg-bin/show_pathway?map=hsa05330&multi_query=3107%09purple/355%09purple/3117%09purple/3126%09purple/
hsa04932	Non-alcoholic fatty liver disease (NAFLD)	151	9	2.34315	0.0208686	0.0854105	www.kegg.jp/kegg-bin/show_pathway?map=hsa04932&multi_query=3569%09purple/9021%09purple/5290%09purple/5563%09purple/3553%09purple/3576%09purple/355%09purple/4708%09purple/1649%09purple/
hsa05202	Transcriptional misregulation in cancers	180	10	2.18405	0.0233382	0.090836	www.kegg.jp/kegg-bin/show_pathway?map=hsa05202&multi_query=597%09purple/221037%09purple/5966%09purple/3021%09purple/7102%09red/8013%09purple/3569%09purple/64332%09purple/3576%09purple/4221%09purple/1649%09purple/
hsa05132	Salmonella infection	86	6	2.74276	0.0287629	0.108751	www.kegg.jp/kegg-bin/show_pathway?map=hsa05132&multi_query=2353%09purple/3553%09purple/3569%09purple/3576%09purple/2920%09purple/79659%09purple/2318%09red/
hsa04672	Intestinal immune network for IgA production	48	4	3.27607	0.0412481	0.153042	www.kegg.jp/kegg-bin/show_pathway?map=hsa04672&multi_query=3117%09purple/3126%09purple/3569%09purple/10673%09purple/
hsa05169	Epstein-Barr virus infection	202	10	1.94618	0.0437796	0.155183	www.kegg.jp/kegg-bin/show_pathway?map=hsa05169&multi_query=3107%09purple/3303%09red/3304%09red/3304%09purple/3315%09red/5290%09purple/965%09purple/3383%09purple/7128%09purple/23586%09purple/5610%09purple/3117%09purple/3126%09purple/5433%09red/
hsa04710	Circadian rhythm	31	3	3.80447	0.052727	0.180639	www.kegg.jp/kegg-bin/show_pathway?map=hsa04710&multi_query=9575%09purple/8553%09purple/5563%09purple/
hsa05320	Autoimmune thyroid disease	53	4	2.96701	0.0545965	0.180639	www.kegg.jp/kegg-bin/show_pathway?map=hsa05320&multi_query=3117%09purple/3126%09purple/3107%09purple/355%09purple/
hsa04015	Rap1 signaling pathway	211	10	1.86317	0.0548288	0.180639	www.kegg.jp/kegg-bin/show_pathway?map=hsa04015&multi_query=9771%09purple/9732%09purple/2246%09purple/2252%09purple/284%09purple/285%09purple/5156%09purple/2533%09purple/7057%09purple/5290%09purple/
hsa05142	Chagas disease (American trypanosomiasis)	104	6	2.26805	0.0593278	0.187685	www.kegg.jp/kegg-bin/show_pathway?map=hsa05142&multi_query=2353%09purple/3569%09purple/3576%09purple/3553%09purple/7042%09red/5290%09purple/355%09purple/
hsa04380	Osteoclast differentiation	132	7	2.08477	0.0621559	0.187685	www.kegg.jp/kegg-bin/show_pathway?map=hsa04380&multi_query=5290%09purple/3553%09purple/7042%09red/2353%09purple/2354%09purple/3726%09purple/2215%09purple/9021%09purple/
hsa04620	Toll-like receptor signaling pathway	106	6	2.22526	0.0635798	0.187685	www.kegg.jp/kegg-bin/show_pathway?map=hsa04620&multi_query=7098%09purple/5290%09purple/2353%09purple/3553%09purple/3569%09purple/3576%09purple/
hsa05150	Staphylococcus aureus infection	56	4	2.80806	0.0635895	0.187685	www.kegg.jp/kegg-bin/show_pathway?map=hsa05150&multi_query=1675%09red/721%09red/2215%09purple/3383%09purple/3117%09purple/3126%09purple/
hsa05160	Hepatitis C	133	7	2.0691	0.0640589	0.187685	www.kegg.jp/kegg-bin/show_pathway?map=hsa05160&multi_query=23586%09purple/7098%09purple/5610%09purple/3576%09purple/3434%09purple/9021%09purple/5290%09purple/
hsa04068	FoxO signaling pathway	134	7	2.05366	0.0659965	0.187812	www.kegg.jp/kegg-bin/show_pathway?map=hsa04068&multi_query=7042%09red/5563%09purple/5290%09purple/6446%09purple/3569%09purple/2290%09red/10769%09purple/4616%09purple/114907%09purple/
hsa00604	Glycosphingolipid biosynthesis - ganglio series	15	2	5.24171	0.0662309	0.187812	www.kegg.jp/kegg-bin/show_pathway?map=hsa00604&multi_query=9197%09purple/81849%09purple/
hsa05020	Prion diseases	35	3	3.36967	0.0690956	0.193858	www.kegg.jp/kegg-bin/show_pathway?map=hsa05020&multi_query=1958%09purple/3553%09purple/3569%09purple/3303%09red/
hsa00073	Cutin, suberine and wax biosynthesis	2	1	19.6564	0.0729628	0.201789	www.kegg.jp/kegg-bin/show_pathway?map=hsa00073&multi_query=84188%09purple/
hsa05416	Viral myocarditis	59	4	2.66528	0.0733029	0.201789	www.kegg.jp/kegg-bin/show_pathway?map=hsa05416&multi_query=3117%09purple/3126%09purple/3107%09purple/3383%09purple/3908%09red/
hsa04210	Apoptosis	140	7	1.96564	0.0783503	0.201789	www.kegg.jp/kegg-bin/show_pathway?map=hsa04210&multi_query=355%09purple/329%09purple/2353%09purple/4616%09purple/597%09purple/5290%09purple/1649%09purple/
hsa04014	Ras signaling pathway	227	10	1.73184	0.0786379	0.201789	www.kegg.jp/kegg-bin/show_pathway?map=hsa04014&multi_query=2246%09purple/2252%09purple/284%09purple/285%09purple/5156%09purple/399694%09purple/5922%09purple/5290%09purple/9771%09purple/5966%09purple/
hsa05166	HTLV-I infection	258	11	1.67613	0.080309	0.201789	www.kegg.jp/kegg-bin/show_pathway?map=hsa05166&multi_query=7042%09red/3383%09purple/3107%09purple/5156%09purple/5290%09purple/3569%09purple/7538%09purple/3117%09purple/3126%09purple/2353%09purple/1958%09purple/1959%09purple/
hsa04640	Hematopoietic cell lineage	88	5	2.23368	0.0847981	0.206682	www.kegg.jp/kegg-bin/show_pathway?map=hsa04640&multi_query=3569%09purple/3553%09purple/947%09red/7037%09purple/3672%09purple/3126%09purple/
hsa03013	RNA transport	172	8	1.8285	0.0856404	0.206682	www.kegg.jp/kegg-bin/show_pathway?map=hsa03013&multi_query=5903%09purple/400966%09purple/727851%09purple/6607%09purple/1964%09purple/1968%09purple/9984%09purple/6606%09purple/
hsa04960	Aldosterone-regulated sodium reabsorption	39	3	3.02407	0.0874458	0.209132	www.kegg.jp/kegg-bin/show_pathway?map=hsa04960&multi_query=6338%09red/6446%09purple/477%09red/483%09purple/5290%09purple/
hsa00770	Pantothenate and CoA biosynthesis	18	2	4.36809	0.0881057	0.209449	www.kegg.jp/kegg-bin/show_pathway?map=hsa00770&multi_query=80025%09purple/5167%09red/8875%09purple/
hsa05414	Dilated cardiomyopathy (DCM)	90	5	2.18405	0.0908417	0.212768	www.kegg.jp/kegg-bin/show_pathway?map=hsa05414&multi_query=3672%09purple/3679%09red/3680%09red/3696%09purple/1674%09red/7273%09purple/70%09red/783%09red/785%09purple/7042%09red/3908%09red/781%09purple/
hsa05321	Inflammatiory bowel disease (IBD)	65	4	2.41925	0.0948047	0.219461	www.kegg.jp/kegg-bin/show_pathway?map=hsa05321&multi_query=3117%09purple/3126%09purple/3569%09purple/3553%09purple/7042%09red/
hsa04115	p53 signaling pathway	69	4	2.27901	0.110589	0.252756	www.kegg.jp/kegg-bin/show_pathway?map=hsa04115&multi_query=4616%09purple/355%09purple/7057%09purple/143686%09purple/
hsa04151	PI3K-Akt signaling pathway	341	13	1.49873	0.1146	0.252756	www.kegg.jp/kegg-bin/show_pathway?map=hsa04151&multi_query=2246%09purple/2252%09purple/284%09purple/285%09purple/5156%09purple/3569%09purple/3908%09red/7057%09purple/7148%09red/3672%09purple/3679%09red/3680%09red/3696%09purple/5563%09purple/54541%09red/6446%09purple/9586%09red/3164%09purple/5290%09purple/
hsa05218	Melanoma	71	4	2.21481	0.118888	0.259332	www.kegg.jp/kegg-bin/show_pathway?map=hsa05218&multi_query=2246%09purple/2252%09purple/5156%09purple/5290%09purple/
hsa04921	Oxytocin signaling pathway	158	7	1.74171	0.122751	0.260716	www.kegg.jp/kegg-bin/show_pathway?map=hsa04921&multi_query=5743%09purple/2353%09purple/6263%09red/783%09red/785%09purple/5997%09purple/5563%09purple/5290%09purple/781%09purple/
hsa04917	Prolactin signaling pathway	72	4	2.18405	0.123134	0.260716	www.kegg.jp/kegg-bin/show_pathway?map=hsa04917&multi_query=399694%09purple/5290%09purple/2353%09purple/9021%09purple/
hsa05412	Arrhythmogenic right ventricular cardiomyopathy (ARVC)	74	4	2.12502	0.131815	0.276151	www.kegg.jp/kegg-bin/show_pathway?map=hsa05412&multi_query=3672%09purple/3679%09red/3680%09red/3696%09purple/1674%09red/783%09red/785%09purple/88%09red/3908%09red/781%09purple/
hsa04066	HIF-1 signaling pathway	103	5	1.90839	0.135138	0.278813	www.kegg.jp/kegg-bin/show_pathway?map=hsa04066&multi_query=3569%09purple/5290%09purple/7037%09purple/284%09purple/285%09purple/
hsa05133	Pertussis	75	4	2.09669	0.136246	0.278813	www.kegg.jp/kegg-bin/show_pathway?map=hsa05133&multi_query=3553%09purple/721%09red/2353%09purple/3569%09purple/3576%09purple/
hsa00510	N-Glycan biosynthesis	49	3	2.40691	0.140711	0.285741	www.kegg.jp/kegg-bin/show_pathway?map=hsa00510&multi_query=79868%09purple/7991%09purple/25834%09purple/
hsa03018	RNA degradation	77	4	2.04223	0.145284	0.287879	www.kegg.jp/kegg-bin/show_pathway?map=hsa03018&multi_query=22894%09purple/23517%09purple/10140%09purple/10950%09red/7832%09purple/
hsa04612	Antigen processing and presentation	77	4	2.04223	0.145284	0.287879	www.kegg.jp/kegg-bin/show_pathway?map=hsa04612&multi_query=3303%09red/3304%09red/3304%09purple/3107%09purple/3117%09purple/3126%09purple/
hsa00563	Glycosylphosphatidylinositol(GPI)-anchor biosynthesis	25	2	3.14503	0.14539	0.287879	www.kegg.jp/kegg-bin/show_pathway?map=hsa00563&multi_query=10026%09purple/80055%09purple/
hsa04650	Natural killer cell mediated cytotoxicity	138	6	1.70925	0.154189	0.300801	www.kegg.jp/kegg-bin/show_pathway?map=hsa04650&multi_query=3107%09purple/3383%09purple/2215%09purple/5290%09purple/399694%09purple/355%09purple/
hsa04510	Focal adhesion	202	8	1.55694	0.159691	0.305529	www.kegg.jp/kegg-bin/show_pathway?map=hsa04510&multi_query=3908%09red/7057%09purple/7148%09red/3672%09purple/3679%09red/3680%09red/3696%09purple/5156%09purple/394%09purple/88%09red/2318%09red/5290%09purple/399694%09purple/329%09purple/23396%09red/
hsa05203	Viral carcinogenesis	205	8	1.53416	0.168361	0.316026	www.kegg.jp/kegg-bin/show_pathway?map=hsa05203&multi_query=9586%09red/5290%09purple/5966%09purple/1959%09purple/1960%09purple/6672%09purple/5610%09purple/5922%09purple/88%09red/3107%09purple/
hsa04350	TGF-beta signaling pathway	84	4	1.87204	0.178595	0.331028	www.kegg.jp/kegg-bin/show_pathway?map=hsa04350&multi_query=7057%09purple/7042%09red/25805%09red/9765%09purple/3399%09purple/3400%09purple/
hsa00030	Pentose phosphate pathway	29	2	2.71123	0.180739	0.331028	www.kegg.jp/kegg-bin/show_pathway?map=hsa00030&multi_query=6120%09purple/55276%09purple/
hsa00760	Nicotinate and nicotinamide metabolism	29	2	2.71123	0.180739	0.331028	www.kegg.jp/kegg-bin/show_pathway?map=hsa00760&multi_query=54981%09purple/5167%09red/10135%09purple/316%09red/
hsa04923	Regulation of lipolysis in adipocyte	56	3	2.10605	0.182914	0.331028	www.kegg.jp/kegg-bin/show_pathway?map=hsa04923&multi_query=5290%09purple/5743%09purple/5733%09purple/4886%09red/
hsa05152	Tuberculosis	178	7	1.54601	0.183858	0.331028	www.kegg.jp/kegg-bin/show_pathway?map=hsa05152&multi_query=3117%09purple/3126%09purple/64581%09purple/3569%09purple/3553%09purple/30835%09red/7042%09red/22925%09purple/2215%09purple/
hsa04810	Regulation of actin cytoskeleton	214	8	1.46964	0.19557	0.342067	www.kegg.jp/kegg-bin/show_pathway?map=hsa04810&multi_query=2246%09purple/2252%09purple/5156%09purple/3672%09purple/3679%09red/3680%09red/3696%09purple/1132%09red/9459%09purple/5290%09purple/23396%09red/5962%09purple/88%09red/
hsa05145	Toxoplasmosis	118	5	1.6658	0.19559	0.342067	www.kegg.jp/kegg-bin/show_pathway?map=hsa05145&multi_query=3117%09purple/3126%09purple/329%09purple/3303%09red/3304%09red/3304%09purple/3908%09red/5290%09purple/7042%09red/
hsa05310	Asthma	31	2	2.53631	0.198849	0.346242	www.kegg.jp/kegg-bin/show_pathway?map=hsa05310&multi_query=3117%09purple/3126%09purple/
hsa00561	Glycerolipid metabolism	59	3	1.99896	0.201911	0.349275	www.kegg.jp/kegg-bin/show_pathway?map=hsa00561&multi_query=219%09red/2710%09purple/129642%09purple/1056%09purple/
hsa04211	Longevity regulating pathway - mammal	94	4	1.67289	0.229894	0.383857	www.kegg.jp/kegg-bin/show_pathway?map=hsa04211&multi_query=5290%09purple/9586%09red/9821%09purple/5563%09purple/143686%09purple/
hsa05200	Pathways in cancer	397	13	1.28732	0.232955	0.383857	www.kegg.jp/kegg-bin/show_pathway?map=hsa05200&multi_query=5733%09purple/3908%09red/5290%09purple/5743%09purple/329%09purple/1909%09purple/5156%09purple/2246%09purple/2252%09purple/2353%09purple/3576%09purple/3569%09purple/7042%09red/355%09purple/5727%09purple/
hsa04623	Cytosolic DNA-sensing pathway	64	3	1.84279	0.234472	0.383857	www.kegg.jp/kegg-bin/show_pathway?map=hsa04623&multi_query=23586%09purple/3569%09purple/3553%09purple/
hsa04924	Renin secretion	64	3	1.84279	0.234472	0.383857	www.kegg.jp/kegg-bin/show_pathway?map=hsa04924&multi_query=5136%09purple/5139%09purple/1909%09purple/
hsa04213	Longevity regulating pathway - multiple species	64	3	1.84279	0.234472	0.383857	www.kegg.jp/kegg-bin/show_pathway?map=hsa04213&multi_query=5290%09purple/5563%09purple/3303%09red/3304%09red/3304%09purple/
hsa05214	Glioma	65	3	1.81444	0.241092	0.387661	www.kegg.jp/kegg-bin/show_pathway?map=hsa05214&multi_query=5156%09purple/399694%09purple/5290%09purple/
hsa05206	MicroRNAs in cancer	297	10	1.32366	0.243142	0.387661	www.kegg.jp/kegg-bin/show_pathway?map=hsa05206&multi_query=406991%09purple/407021%09purple/7042%09red/54541%09red/5962%09purple/7148%09red/7057%09purple/406977%09purple/5743%09purple/5156%09purple/399694%09purple/4082%09purple/5290%09purple/
hsa03030	DNA replication	36	2	2.18405	0.244843	0.38881	www.kegg.jp/kegg-bin/show_pathway?map=hsa03030&multi_query=5981%09purple/4171%09purple/
hsa04915	Estrogen signaling pathway	99	4	1.5884	0.256756	0.401592	www.kegg.jp/kegg-bin/show_pathway?map=hsa04915&multi_query=3303%09red/3304%09red/3304%09purple/2353%09purple/9586%09red/399694%09purple/5290%09purple/
hsa04024	cAMP signaling pathway	199	7	1.38286	0.258455	0.401592	www.kegg.jp/kegg-bin/show_pathway?map=hsa04024&multi_query=1909%09purple/4886%09red/5733%09purple/5290%09purple/9586%09red/2353%09purple/5727%09purple/477%09red/483%09purple/5139%09purple/
hsa05146	Amoebiasis	100	4	1.57251	0.262202	0.404249	www.kegg.jp/kegg-bin/show_pathway?map=hsa05146&multi_query=3553%09purple/3315%09red/3908%09red/3569%09purple/3576%09purple/88%09red/5290%09purple/7042%09red/
hsa05231	Choline metabolism in cancer	101	4	1.55694	0.267668	0.40612	www.kegg.jp/kegg-bin/show_pathway?map=hsa05231&multi_query=5156%09purple/5290%09purple/23396%09red/6581%09red/2353%09purple/56261%09purple/
hsa03040	Spliceosome	134	5	1.4669	0.268019	0.40612	www.kegg.jp/kegg-bin/show_pathway?map=hsa03040&multi_query=23350%09purple/3303%09red/3304%09red/3304%09purple/9984%09purple/6426%09purple/3192%09purple/
hsa05205	Proteoglycans in cancer	203	7	1.35562	0.273552	0.408266	www.kegg.jp/kegg-bin/show_pathway?map=hsa05205&multi_query=2318%09red/5290%09purple/406991%09purple/7057%09purple/355%09purple/7042%09red/5329%09purple/5962%09purple/5727%09purple/
hsa04622	RIG-I-like receptor signaling pathway	70	3	1.68484	0.274577	0.408266	www.kegg.jp/kegg-bin/show_pathway?map=hsa04622&multi_query=23586%09purple/64135%09purple/3576%09purple/
hsa05219	Bladder cancer	41	2	1.9177	0.291144	0.431285	www.kegg.jp/kegg-bin/show_pathway?map=hsa05219&multi_query=7057%09purple/3576%09purple/
hsa03450	Non-homologous end-joining	13	1	3.02407	0.297621	0.440057	www.kegg.jp/kegg-bin/show_pathway?map=hsa03450&multi_query=64421%09purple/
hsa04931	Insulin resistance	109	4	1.44267	0.311976	0.457872	www.kegg.jp/kegg-bin/show_pathway?map=hsa04931&multi_query=5290%09purple/3569%09purple/9021%09purple/5563%09purple/5834%09red/9586%09red/
hsa04973	Carbohydrate digestion and absorption	45	2	1.74724	0.327915	0.478231	www.kegg.jp/kegg-bin/show_pathway?map=hsa04973&multi_query=477%09red/483%09purple/5290%09purple/
hsa04260	Cardiac muscle contraction	78	3	1.51203	0.328859	0.478231	www.kegg.jp/kegg-bin/show_pathway?map=hsa04260&multi_query=783%09red/785%09purple/70%09red/477%09red/483%09purple/781%09purple/
hsa04261	Adrenergic signaling in cardiomyocytes	148	5	1.32814	0.335222	0.481066	www.kegg.jp/kegg-bin/show_pathway?map=hsa04261&multi_query=477%09red/483%09purple/6332%09purple/783%09red/785%09purple/70%09red/146%09red/5502%09red/9586%09red/5290%09purple/781%09purple/
hsa04610	Complement and coagulation cascades	79	3	1.49289	0.335655	0.481066	www.kegg.jp/kegg-bin/show_pathway?map=hsa04610&multi_query=7035%09purple/5329%09purple/1675%09red/721%09red/4179%09purple/
hsa03420	Nucleotide excision repair	47	2	1.67289	0.346106	0.494259	www.kegg.jp/kegg-bin/show_pathway?map=hsa03420&multi_query=902%09purple/5981%09purple/
hsa00520	Amino sugar and nucleotide sugar metabolism	48	2	1.63804	0.355139	0.500302	www.kegg.jp/kegg-bin/show_pathway?map=hsa00520&multi_query=6675%09purple/55276%09purple/
hsa04330	Notch signaling pathway	48	2	1.63804	0.355139	0.500302	www.kegg.jp/kegg-bin/show_pathway?map=hsa04330&multi_query=3280%09purple/9541%09purple/
hsa04930	Type II diabetes mellitus	48	2	1.63804	0.355139	0.500302	www.kegg.jp/kegg-bin/show_pathway?map=hsa04930&multi_query=5290%09purple/9021%09purple/
hsa04512	ECM-receptor interaction	82	3	1.43827	0.356008	0.500302	www.kegg.jp/kegg-bin/show_pathway?map=hsa04512&multi_query=3908%09red/7057%09purple/7148%09red/3672%09purple/3679%09red/3680%09red/3696%09purple/
hsa00120	Primary bile acid biosynthesis	17	1	2.31252	0.364976	0.511095	www.kegg.jp/kegg-bin/show_pathway?map=hsa00120&multi_query=9023%09purple/
hsa00450	Selenocompound metabolism	17	1	2.31252	0.364976	0.511095	www.kegg.jp/kegg-bin/show_pathway?map=hsa00450&multi_query=1491%09purple/
hsa04978	Mineral absorption	51	2	1.54168	0.381946	0.53163	www.kegg.jp/kegg-bin/show_pathway?map=hsa04978&multi_query=54822%09purple/477%09red/483%09purple/
hsa05222	Small cell lung cancer	86	3	1.37138	0.382988	0.53163	www.kegg.jp/kegg-bin/show_pathway?map=hsa05222&multi_query=3908%09red/5290%09purple/329%09purple/5743%09purple/
hsa04110	Cell cycle	124	4	1.26816	0.395999	0.545874	www.kegg.jp/kegg-bin/show_pathway?map=hsa04110&multi_query=7042%09red/902%09purple/4616%09purple/4999%09purple/4171%09purple/
hsa03460	Fanconi anemia pathway	53	2	1.4835	0.399543	0.548853	www.kegg.jp/kegg-bin/show_pathway?map=hsa03460&multi_query=3280%09purple/51426%09purple/
hsa04974	Protein digestion and absorption	90	3	1.31043	0.409686	0.55988	www.kegg.jp/kegg-bin/show_pathway?map=hsa04974&multi_query=477%09red/483%09purple/54407%09purple/1300%09purple/
hsa00100	Steroid biosynthesis	20	1	1.96564	0.411196	0.560979	www.kegg.jp/kegg-bin/show_pathway?map=hsa00100&multi_query=1056%09purple/
hsa05032	Morphine addiction	91	3	1.29603	0.416304	0.565035	www.kegg.jp/kegg-bin/show_pathway?map=hsa05032&multi_query=5136%09purple/5139%09purple/10846%09purple/
hsa05223	Non-small cell lung cancer	56	2	1.40403	0.425474	0.573625	www.kegg.jp/kegg-bin/show_pathway?map=hsa05223&multi_query=5290%09purple/27436%09purple/
hsa04022	cGMP - PKG signaling pathway	167	5	1.17703	0.42769	0.573625	www.kegg.jp/kegg-bin/show_pathway?map=hsa04022&multi_query=1909%09purple/146%09red/152%09red/477%09red/483%09purple/5997%09purple/5139%09purple/5290%09purple/9586%09red/
hsa04141	Protein processing in endoplasmic reticulum	169	5	1.1631	0.437321	0.581629	www.kegg.jp/kegg-bin/show_pathway?map=hsa04141&multi_query=7991%09purple/7415%09red/3303%09red/3304%09red/3304%09purple/3337%09red/9532%09red/5610%09purple/22926%09purple/1649%09purple/
hsa00564	Glycerophospholipid metabolism	95	3	1.24146	0.44251	0.585588	www.kegg.jp/kegg-bin/show_pathway?map=hsa00564&multi_query=129642%09purple/56261%09purple/55500%09purple/
hsa03430	Mismatch repair	23	1	1.70925	0.454036	0.596202	www.kegg.jp/kegg-bin/show_pathway?map=hsa03430&multi_query=5981%09purple/
hsa04614	Renin-angiotensin system	23	1	1.70925	0.454036	0.596202	www.kegg.jp/kegg-bin/show_pathway?map=hsa04614&multi_query=2028%09purple/
hsa04964	Proximal tubule bicarbonate reclamation	23	1	1.70925	0.454036	0.596202	www.kegg.jp/kegg-bin/show_pathway?map=hsa04964&multi_query=477%09red/483%09purple/
hsa01040	Biosynthesis of unsaturated fatty acids	23	1	1.70925	0.454036	0.596202	www.kegg.jp/kegg-bin/show_pathway?map=hsa01040&multi_query=401494%09purple/
hsa05322	Systemic lupus erythematosus	135	4	1.16483	0.456537	0.596202	www.kegg.jp/kegg-bin/show_pathway?map=hsa05322&multi_query=721%09red/3021%09purple/88%09red/3117%09purple/3126%09purple/2215%09purple/
hsa04150	mTOR signaling pathway	60	2	1.31043	0.459092	0.597572	www.kegg.jp/kegg-bin/show_pathway?map=hsa04150&multi_query=5290%09purple/54541%09red/5563%09purple/
hsa04370	VEGF signaling pathway	61	2	1.28895	0.467313	0.606285	www.kegg.jp/kegg-bin/show_pathway?map=hsa04370&multi_query=5743%09purple/3315%09red/5290%09purple/
hsa05210	Colorectal cancer	62	2	1.26816	0.475458	0.61418	www.kegg.jp/kegg-bin/show_pathway?map=hsa05210&multi_query=5290%09purple/2353%09purple/7042%09red/
hsa04910	Insulin signaling pathway	139	4	1.13131	0.478039	0.61418	www.kegg.jp/kegg-bin/show_pathway?map=hsa04910&multi_query=5290%09purple/5834%09red/10580%09red/5563%09purple/399694%09purple/9021%09purple/
hsa00062	Fatty acid elongation	25	1	1.57251	0.48084	0.61678	www.kegg.jp/kegg-bin/show_pathway?map=hsa00062&multi_query=401494%09purple/
hsa00601	Glycosphingolipid biosynthesis - lacto and neolacto series	26	1	1.51203	0.493742	0.620653	www.kegg.jp/kegg-bin/show_pathway?map=hsa00601&multi_query=8707%09purple/
hsa04950	Maturity onset diabetes of the young	26	1	1.51203	0.493742	0.620653	www.kegg.jp/kegg-bin/show_pathway?map=hsa04950&multi_query=3280%09purple/
hsa04550	Signaling pathways regulating pluripotency of stem cells	142	4	1.1074	0.493938	0.620653	www.kegg.jp/kegg-bin/show_pathway?map=hsa04550&multi_query=5290%09purple/3399%09purple/3400%09purple/6498%09purple/
hsa04144	Endocytosis	259	7	1.06251	0.494021	0.620653	www.kegg.jp/kegg-bin/show_pathway?map=hsa04144&multi_query=7042%09red/9765%09purple/7037%09purple/5156%09purple/23396%09red/273%09red/3303%09red/3304%09red/3304%09purple/829%09purple/57132%09purple/3107%09purple/
hsa04072	Phospholipase D signaling pathway	144	4	1.09202	0.504419	0.62973	www.kegg.jp/kegg-bin/show_pathway?map=hsa04072&multi_query=5156%09purple/399694%09purple/5290%09purple/23396%09red/3576%09purple/
hsa04966	Collecting duct acid secretion	27	1	1.45603	0.506322	0.630294	www.kegg.jp/kegg-bin/show_pathway?map=hsa04966&multi_query=51382%09purple/
hsa05212	Pancreatic cancer	66	2	1.1913	0.507252	0.630294	www.kegg.jp/kegg-bin/show_pathway?map=hsa05212&multi_query=5290%09purple/9459%09purple/7042%09red/
hsa05230	Central carbon metabolism in cancer	67	2	1.17352	0.514998	0.635939	www.kegg.jp/kegg-bin/show_pathway?map=hsa05230&multi_query=5156%09purple/5290%09purple/
hsa05031	Amphetamine addiction	67	2	1.17352	0.514998	0.635939	www.kegg.jp/kegg-bin/show_pathway?map=hsa05031&multi_query=9586%09red/2353%09purple/2354%09purple/
hsa00010	Glycolysis / Gluconeogenesis	68	2	1.15626	0.522662	0.641412	www.kegg.jp/kegg-bin/show_pathway?map=hsa00010&multi_query=126%09purple/219%09red/55276%09purple/
hsa05120	Epithelial cell signaling in Helicobacter pylori infection	68	2	1.15626	0.522662	0.641412	www.kegg.jp/kegg-bin/show_pathway?map=hsa05120&multi_query=3576%09purple/51382%09purple/
hsa04060	Cytokine-cytokine receptor interaction	269	7	1.02301	0.532052	0.645947	www.kegg.jp/kegg-bin/show_pathway?map=hsa04060&multi_query=2920%09purple/3576%09purple/3569%09purple/10673%09purple/7042%09red/3553%09purple/5156%09purple/51330%09red/355%09purple/
hsa04920	Adipocytokine signaling pathway	70	2	1.12322	0.537741	0.650863	www.kegg.jp/kegg-bin/show_pathway?map=hsa04920&multi_query=9021%09purple/5563%09purple/
hsa00052	Galactose metabolism	30	1	1.31043	0.542206	0.655269	www.kegg.jp/kegg-bin/show_pathway?map=hsa00052&multi_query=55276%09purple/
hsa00512	Mucin type O-glycan biosynthesis	31	1	1.26816	0.553575	0.667992	www.kegg.jp/kegg-bin/show_pathway?map=hsa00512&multi_query=57452%09red/2589%09purple/
hsa04662	B cell receptor signaling pathway	73	2	1.07706	0.559725	0.671332	www.kegg.jp/kegg-bin/show_pathway?map=hsa04662&multi_query=2353%09purple/5290%09purple/
hsa05220	Chronic myeloid leukemia	73	2	1.07706	0.559725	0.671332	www.kegg.jp/kegg-bin/show_pathway?map=hsa05220&multi_query=5290%09purple/399694%09purple/7042%09red/
hsa01230	Biosynthesis of amino acids	74	2	1.06251	0.566883	0.675834	www.kegg.jp/kegg-bin/show_pathway?map=hsa01230&multi_query=6120%09purple/1491%09purple/
hsa04971	Gastric acid secretion	74	2	1.06251	0.566883	0.675834	www.kegg.jp/kegg-bin/show_pathway?map=hsa04971&multi_query=3772%09purple/477%09red/483%09purple/
hsa04670	Leukocyte transendothelial migration	118	3	0.999479	0.581807	0.690515	www.kegg.jp/kegg-bin/show_pathway?map=hsa04670&multi_query=5290%09purple/3383%09purple/394%09purple/88%09red/
hsa04130	SNARE interactions in vesicular transport	34	1	1.15626	0.586007	0.694463	www.kegg.jp/kegg-bin/show_pathway?map=hsa04130&multi_query=8674%09purple/
hsa05100	Bacterial invasion of epithelial cells	78	2	1.00802	0.594658	0.702617	www.kegg.jp/kegg-bin/show_pathway?map=hsa05100&multi_query=5290%09purple/399694%09purple/
hsa00350	Tyrosine metabolism	35	1	1.12322	0.596283	0.70349	www.kegg.jp/kegg-bin/show_pathway?map=hsa00350&multi_query=3242%09red/8639%09red/126%09purple/316%09red/
hsa00040	Pentose and glucuronate interconversions	36	1	1.09202	0.606302	0.714249	www.kegg.jp/kegg-bin/show_pathway?map=hsa00040&multi_query=6120%09purple/219%09red/
hsa04925	Aldosterone synthesis and secretion	81	2	0.970688	0.614588	0.721868	www.kegg.jp/kegg-bin/show_pathway?map=hsa04925&multi_query=9586%09red/4929%09purple/3164%09purple/
hsa05340	Primary immunodeficiency	37	1	1.06251	0.616071	0.722212	www.kegg.jp/kegg-bin/show_pathway?map=hsa05340&multi_query=64421%09purple/
hsa05204	Chemical carcinogenesis	82	2	0.95885	0.62106	0.722212	www.kegg.jp/kegg-bin/show_pathway?map=hsa05204&multi_query=1543%09red/5743%09purple/126%09purple/1646%09red/
hsa05010	Alzheimer's disease	168	4	0.93602	0.621248	0.722212	www.kegg.jp/kegg-bin/show_pathway?map=hsa05010&multi_query=4708%09purple/355%09purple/6263%09red/22926%09purple/3553%09purple/
hsa04140	Regulation of autophagy	39	1	1.00802	0.634885	0.736986	www.kegg.jp/kegg-bin/show_pathway?map=hsa04140&multi_query=5563%09purple/
hsa00260	Glycine, serine and threonine metabolism	40	1	0.982821	0.643941	0.746407	www.kegg.jp/kegg-bin/show_pathway?map=hsa00260&multi_query=8639%09red/1491%09purple/
hsa04012	ErbB signaling pathway	87	2	0.903744	0.652147	0.75271	www.kegg.jp/kegg-bin/show_pathway?map=hsa04012&multi_query=399694%09purple/5290%09purple/
hsa04975	Fat digestion and absorption	41	1	0.95885	0.652771	0.75271	www.kegg.jp/kegg-bin/show_pathway?map=hsa04975&multi_query=1056%09purple/
hsa00230	Purine metabolism	176	4	0.893474	0.656015	0.75271	www.kegg.jp/kegg-bin/show_pathway?map=hsa00230&multi_query=55276%09purple/5136%09purple/5139%09purple/10846%09purple/5167%09red/5433%09red/
hsa03008	Ribosome biogenesis in eukaryotes	89	2	0.883435	0.663993	0.757487	www.kegg.jp/kegg-bin/show_pathway?map=hsa03008&multi_query=84128%09purple/51602%09purple/
hsa05215	Prostate cancer	89	2	0.883435	0.663993	0.757487	www.kegg.jp/kegg-bin/show_pathway?map=hsa05215&multi_query=5156%09purple/5290%09purple/9586%09red/
hsa04020	Calcium signaling pathway	180	4	0.873619	0.672556	0.76287	www.kegg.jp/kegg-bin/show_pathway?map=hsa04020&multi_query=6263%09red/146%09red/1909%09purple/5733%09purple/5156%09purple/5136%09purple/
hsa00071	Fatty acid degradation	44	1	0.893474	0.677963	0.764131	www.kegg.jp/kegg-bin/show_pathway?map=hsa00071&multi_query=126%09purple/219%09red/
hsa04962	Vasopressin-regulated water reabsorption	44	1	0.893474	0.677963	0.764131	www.kegg.jp/kegg-bin/show_pathway?map=hsa04962&multi_query=9586%09red/79659%09purple/
hsa04120	Ubiquitin mediated proteolysis	137	3	0.860865	0.678479	0.764131	www.kegg.jp/kegg-bin/show_pathway?map=hsa04120&multi_query=55284%09purple/329%09purple/9021%09purple/
hsa00270	Cysteine and methionine metabolism	45	1	0.873619	0.685945	0.769024	www.kegg.jp/kegg-bin/show_pathway?map=hsa00270&multi_query=1491%09purple/
hsa03022	Basal transcription factors	45	1	0.873619	0.685945	0.769024	www.kegg.jp/kegg-bin/show_pathway?map=hsa03022&multi_query=902%09purple/
hsa04666	Fc gamma R-mediated phagocytosis	93	2	0.845438	0.686697	0.769024	www.kegg.jp/kegg-bin/show_pathway?map=hsa04666&multi_query=5290%09purple/4082%09purple/23396%09red/273%09red/
hsa04062	Chemokine signaling pathway	187	4	0.840917	0.700135	0.778806	www.kegg.jp/kegg-bin/show_pathway?map=hsa04062&multi_query=2920%09purple/3576%09purple/399694%09purple/5290%09purple/
hsa00600	Sphingolipid metabolism	47	1	0.836444	0.701318	0.778806	www.kegg.jp/kegg-bin/show_pathway?map=hsa00600&multi_query=7357%09purple/
hsa04961	Endocrine and other factor-regulated calcium reabsorption	47	1	0.836444	0.701318	0.778806	www.kegg.jp/kegg-bin/show_pathway?map=hsa04961&multi_query=477%09red/483%09purple/
hsa01212	Fatty acid metabolism	48	1	0.819018	0.708718	0.784398	www.kegg.jp/kegg-bin/show_pathway?map=hsa01212&multi_query=401494%09purple/
hsa04070	Phosphatidylinositol signaling system	98	2	0.802303	0.713269	0.784398	www.kegg.jp/kegg-bin/show_pathway?map=hsa04070&multi_query=23396%09red/5290%09purple/23262%09purple/
hsa04972	Pancreatic secretion	98	2	0.802303	0.713269	0.784398	www.kegg.jp/kegg-bin/show_pathway?map=hsa04972&multi_query=477%09red/483%09purple/1056%09purple/
hsa04750	Inflammatory mediator regulation of TRP channels	98	2	0.802303	0.713269	0.784398	www.kegg.jp/kegg-bin/show_pathway?map=hsa04750&multi_query=3553%09purple/5290%09purple/
hsa05030	Cocaine addiction	49	1	0.802303	0.715934	0.78624	www.kegg.jp/kegg-bin/show_pathway?map=hsa05030&multi_query=9586%09red/2354%09purple/
hsa00330	Arginine and proline metabolism	50	1	0.786257	0.72297	0.791777	www.kegg.jp/kegg-bin/show_pathway?map=hsa00330&multi_query=219%09red/6303%09purple/
hsa04913	Ovarian Steroidogenesis	50	1	0.786257	0.72297	0.791777	www.kegg.jp/kegg-bin/show_pathway?map=hsa04913&multi_query=5743%09purple/1543%09red/
hsa04922	Glucagon signaling pathway	101	2	0.778472	0.728277	0.795394	www.kegg.jp/kegg-bin/show_pathway?map=hsa04922&multi_query=9586%09red/150094%09purple/5834%09red/5563%09purple/
hsa05110	Vibrio cholerae infection	51	1	0.77084	0.729831	0.795997	www.kegg.jp/kegg-bin/show_pathway?map=hsa05110&multi_query=51382%09purple/
hsa00310	Lysine degradation	52	1	0.756016	0.736521	0.801093	www.kegg.jp/kegg-bin/show_pathway?map=hsa00310&multi_query=10157%09purple/219%09red/
hsa05213	Endometrial cancer	52	1	0.756016	0.736521	0.801093	www.kegg.jp/kegg-bin/show_pathway?map=hsa05213&multi_query=5290%09purple/
hsa04660	T cell receptor signaling pathway	104	2	0.756016	0.742606	0.804881	www.kegg.jp/kegg-bin/show_pathway?map=hsa04660&multi_query=2353%09purple/5290%09purple/
hsa04340	Hedgehog signaling pathway	53	1	0.741752	0.743045	0.804881	www.kegg.jp/kegg-bin/show_pathway?map=hsa04340&multi_query=5727%09purple/
hsa05217	Basal cell carcinoma	55	1	0.714779	0.755609	0.817375	www.kegg.jp/kegg-bin/show_pathway?map=hsa05217&multi_query=5727%09purple/
hsa00500	Starch and sucrose metabolism	56	1	0.702015	0.761657	0.822657	www.kegg.jp/kegg-bin/show_pathway?map=hsa00500&multi_query=55276%09purple/5834%09red/5167%09red/
hsa04630	Jak-STAT signaling pathway	158	3	0.746447	0.764636	0.822657	www.kegg.jp/kegg-bin/show_pathway?map=hsa04630&multi_query=3569%09purple/9021%09purple/316%09red/5290%09purple/
hsa05221	Acute myeloid leukemia	57	1	0.689699	0.767555	0.82468	www.kegg.jp/kegg-bin/show_pathway?map=hsa05221&multi_query=5290%09purple/
hsa04725	Cholinergic synapse	111	2	0.70834	0.773516	0.828841	www.kegg.jp/kegg-bin/show_pathway?map=hsa04725&multi_query=1132%09red/2353%09purple/9586%09red/5290%09purple/
hsa00590	Arachidonic acid metabolism	62	1	0.634078	0.794916	0.850624	www.kegg.jp/kegg-bin/show_pathway?map=hsa00590&multi_query=5743%09purple/
hsa04721	Synaptic vesicle cycle	63	1	0.624013	0.799987	0.853793	www.kegg.jp/kegg-bin/show_pathway?map=hsa04721&multi_query=51382%09purple/
hsa04919	Thyroid hormone signaling pathway	118	2	0.666319	0.801103	0.853793	www.kegg.jp/kegg-bin/show_pathway?map=hsa04919&multi_query=477%09red/483%09purple/5290%09purple/
hsa04722	Neurotrophin signaling pathway	120	2	0.655214	0.808413	0.858403	www.kegg.jp/kegg-bin/show_pathway?map=hsa04722&multi_query=399694%09purple/5290%09purple/
hsa00830	Retinol metabolism	65	1	0.604813	0.809753	0.858403	www.kegg.jp/kegg-bin/show_pathway?map=hsa00830&multi_query=126%09purple/316%09red/1543%09red/
hsa05131	Shigellosis	65	1	0.604813	0.809753	0.858403	www.kegg.jp/kegg-bin/show_pathway?map=hsa05131&multi_query=3576%09purple/
hsa05211	Renal cell carcinoma	66	1	0.595649	0.814455	0.862237	www.kegg.jp/kegg-bin/show_pathway?map=hsa05211&multi_query=7042%09red/5290%09purple/
hsa04152	AMPK signaling pathway	124	2	0.634078	0.822311	0.868238	www.kegg.jp/kegg-bin/show_pathway?map=hsa04152&multi_query=5563%09purple/9586%09red/5290%09purple/
hsa04664	Fc epsilon RI signaling pathway	68	1	0.57813	0.823511	0.868351	www.kegg.jp/kegg-bin/show_pathway?map=hsa04664&multi_query=5290%09purple/
hsa00982	Drug metabolism - cytochrome P450	69	1	0.569751	0.827872	0.870298	www.kegg.jp/kegg-bin/show_pathway?map=hsa00982&multi_query=126%09purple/316%09red/
hsa03320	PPAR signaling pathway	69	1	0.569751	0.827872	0.870298	www.kegg.jp/kegg-bin/show_pathway?map=hsa03320&multi_query=10580%09red/2710%09purple/
hsa05034	Alcoholism	179	3	0.658875	0.830838	0.870298	www.kegg.jp/kegg-bin/show_pathway?map=hsa05034&multi_query=3021%09purple/9586%09red/399694%09purple/2354%09purple/
hsa00562	Inositol phosphate metabolism	71	1	0.553702	0.83627	0.872458	www.kegg.jp/kegg-bin/show_pathway?map=hsa00562&multi_query=23396%09red/5290%09purple/
hsa04918	Thyroid hormone synthesis	71	1	0.553702	0.83627	0.872458	www.kegg.jp/kegg-bin/show_pathway?map=hsa04918&multi_query=9586%09red/477%09red/483%09purple/
hsa04976	Bile secretion	71	1	0.553702	0.83627	0.872458	www.kegg.jp/kegg-bin/show_pathway?map=hsa04976&multi_query=477%09red/483%09purple/
hsa04728	Dopaminergic synapse	129	2	0.609502	0.838395	0.872458	www.kegg.jp/kegg-bin/show_pathway?map=hsa04728&multi_query=2353%09purple/9586%09red/9575%09purple/
hsa00980	Metabolism of xenobiotics by cytochrome P450	73	1	0.538532	0.844256	0.877407	www.kegg.jp/kegg-bin/show_pathway?map=hsa00980&multi_query=1543%09red/1645%09red/126%09purple/
hsa00190	Oxidative phosphorylation	133	2	0.591171	0.850292	0.881373	www.kegg.jp/kegg-bin/show_pathway?map=hsa00190&multi_query=4708%09purple/51382%09purple/
hsa05012	Parkinson's disease	142	2	0.553702	0.87417	0.903764	www.kegg.jp/kegg-bin/show_pathway?map=hsa05012&multi_query=4708%09purple/120892%09purple/
hsa04146	Peroxisome	83	1	0.473649	0.878685	0.907251	www.kegg.jp/kegg-bin/show_pathway?map=hsa04146&multi_query=84188%09purple/
hsa04911	Insulin secretion	85	1	0.462504	0.884592	0.912164	www.kegg.jp/kegg-bin/show_pathway?map=hsa04911&multi_query=477%09red/483%09purple/9586%09red/
hsa04540	Gap junction	88	1	0.446737	0.892916	0.918362	www.kegg.jp/kegg-bin/show_pathway?map=hsa04540&multi_query=5156%09purple/
hsa04727	GABAergic synapse	88	1	0.446737	0.892916	0.918362	www.kegg.jp/kegg-bin/show_pathway?map=hsa04727&multi_query=54407%09purple/
hsa04970	Salivary secretion	89	1	0.441717	0.895555	0.919884	www.kegg.jp/kegg-bin/show_pathway?map=hsa04970&multi_query=146%09red/6263%09red/477%09red/483%09purple/
hsa04390	Hippo signaling pathway	154	2	0.510556	0.90052	0.921528	www.kegg.jp/kegg-bin/show_pathway?map=hsa04390&multi_query=2246%09purple/7042%09red/329%09purple/
hsa03015	mRNA surveillance pathway	91	1	0.432009	0.900637	0.921528	www.kegg.jp/kegg-bin/show_pathway?map=hsa03015&multi_query=51585%09purple/
hsa04713	Circadian entrainment	95	1	0.413819	0.910067	0.929979	www.kegg.jp/kegg-bin/show_pathway?map=hsa04713&multi_query=6263%09red/2353%09purple/
hsa04914	Progesterone-mediated oocyte maturation	98	1	0.401152	0.916545	0.935394	www.kegg.jp/kegg-bin/show_pathway?map=hsa04914&multi_query=5290%09purple/
hsa04723	Retrograde endocannabinoid signaling	101	1	0.389236	0.922554	0.940318	www.kegg.jp/kegg-bin/show_pathway?map=hsa04723&multi_query=5743%09purple/
hsa04360	Axon guidance	174	2	0.451872	0.933234	0.948768	www.kegg.jp/kegg-bin/show_pathway?map=hsa04360&multi_query=9423%09red/5727%09purple/5290%09purple/
hsa04726	Serotonergic synapse	112	1	0.351008	0.941099	0.95554	www.kegg.jp/kegg-bin/show_pathway?map=hsa04726&multi_query=5743%09purple/
hsa01200	Carbon metabolism	113	1	0.347901	0.942545	0.955787	www.kegg.jp/kegg-bin/show_pathway?map=hsa01200&multi_query=6120%09purple/
hsa04724	Glutamatergic synapse	114	1	0.34485	0.943956	0.955996	www.kegg.jp/kegg-bin/show_pathway?map=hsa04724&multi_query=54407%09purple/
hsa04071	Sphingolipid signaling pathway	120	1	0.327607	0.951718	0.96263	www.kegg.jp/kegg-bin/show_pathway?map=hsa04071&multi_query=5290%09purple/1903%09red/
hsa04611	Platelet activation	122	1	0.322236	0.954058	0.963768	www.kegg.jp/kegg-bin/show_pathway?map=hsa04611&multi_query=5290%09purple/
hsa04270	Vascular smooth muscle contraction	130	1	0.302407	0.962331	0.97089	www.kegg.jp/kegg-bin/show_pathway?map=hsa04270&multi_query=146%09red/1909%09purple/72%09red/
hsa03010	Ribosome	137	1	0.286955	0.968332	0.975705	www.kegg.jp/kegg-bin/show_pathway?map=hsa03010&multi_query=51187%09purple/
hsa04080	Neuroactive ligand-receptor interaction	305	3	0.386684	0.981729	0.985452	www.kegg.jp/kegg-bin/show_pathway?map=hsa04080&multi_query=1132%09red/146%09red/152%09red/1909%09purple/4886%09red/5733%09purple/9934%09red/1903%09red/2743%09purple/
hsa05016	Huntington's disease	193	1	0.203694	0.992051	0.994557	www.kegg.jp/kegg-bin/show_pathway?map=hsa05016&multi_query=9586%09red/4708%09purple/5433%09red/
hsa04740	Olfactory transduction	415	2	0.18946	0.999603	0.999603	www.kegg.jp/kegg-bin/show_pathway?map=hsa04740&multi_query=81696%09red/390078%09red/390058%09red/5997%09purple/5136%09purple/

## Sheet: Down Pathway Gene
pathway_id	pathway_name	symbol	gene_synonyms	description	map_name	population_mapped_id	study_mapped_id	enrichment	p_value	FDR
hsa04668	TNF signaling pathway	BIRC2	API1|HIAP2|Hiap-2|MIHB|RNF48|c-IAP1|cIAP1	baculoviral IAP repeat containing 2	BIRC2_3	110	13	4.64606	1.76673e-05	0.00104011
hsa04668	TNF signaling pathway	CXCL2	CINC-2a|GRO2|GROb|MGSA-b|MIP-2a|MIP2|MIP2A|SCYB2	chemokine (C-X-C motif) ligand 2	CXCL1_2_3	110	13	4.64606	1.76673e-05	0.00104011
hsa04668	TNF signaling pathway	FAS	ALPS1A|APO-1|APT1|CD95|FAS1|FASTM|TNFRSF6	Fas cell surface death receptor	TNFRSF6	110	13	4.64606	1.76673e-05	0.00104011
hsa04668	TNF signaling pathway	IL1B	IL-1|IL1-BETA|IL1F2	interleukin 1 beta	IL1B	110	13	4.64606	1.76673e-05	0.00104011
hsa04668	TNF signaling pathway	IL6	BSF-2|BSF2|CDF|HGF|HSF|IFN-beta-2|IFNB2|IL-6	interleukin 6	IL6	110	13	4.64606	1.76673e-05	0.00104011
hsa04668	TNF signaling pathway	SOCS3	ATOD4|CIS3|Cish3|SOCS-3|SSI-3|SSI3	suppressor of cytokine signaling 3	SOCS3	110	13	4.64606	1.76673e-05	0.00104011
hsa04668	TNF signaling pathway	TNFAIP3	A20|AISBL|OTUD7C|TNFA1P2	TNF alpha induced protein 3	TNFAIP3	110	13	4.64606	1.76673e-05	0.00104011
hsa04668	TNF signaling pathway	FOS	AP-1|C-FOS|p55	FBJ murine osteosarcoma viral oncogene homolog	FOS	110	13	4.64606	1.76673e-05	0.00104011
hsa04668	TNF signaling pathway	JUNB	AP-1	jun B proto-oncogene	JUNB	110	13	4.64606	1.76673e-05	0.00104011
hsa04668	TNF signaling pathway	ICAM1	BB2|CD54|P3.58	intercellular adhesion molecule 1	ICAM1	110	13	4.64606	1.76673e-05	0.00104011
hsa04668	TNF signaling pathway	SELE	CD62E|ELAM|ELAM1|ESEL|LECAM2	selectin E	SELE	110	13	4.64606	1.76673e-05	0.00104011
hsa04668	TNF signaling pathway	PTGS2	COX-2|COX2|GRIPGHS|PGG/HS|PGHS-2|PHS-2|hCox-2	prostaglandin-endoperoxide synthase 2 (prostaglandin G/H synthase and cyclooxygenase)	PTGS2	110	13	4.64606	1.76673e-05	0.00104011
hsa04668	TNF signaling pathway	PIK3CA	CLOVE|CWS5|MCAP|MCM|MCMTC|PI3K|p110-alpha	phosphatidylinositol-4,5-bisphosphate 3-kinase catalytic subunit alpha	PIK3C	110	13	4.64606	1.76673e-05	0.00104011
hsa05164	Influenza A	HSPA1B	HSP70-1B|HSP70-2|HSP70.2	heat shock protein family A (Hsp70) member 1B	HSPA1_8	175	16	3.59432	3.95094e-05	0.00104011
hsa05164	Influenza A	EIF2AK2	EIF2AK1|PKR|PPP1R83|PRKR	eukaryotic translation initiation factor 2 alpha kinase 2	EIF2AK2	175	16	3.59432	3.95094e-05	0.00104011
hsa05164	Influenza A	DDX58	RIG-I|RIGI|RLR-1|SGMRT2	DEXD/H-box helicase 58	DDX58	175	16	3.59432	3.95094e-05	0.00104011
hsa05164	Influenza A	IFIH1	AGS7|Hlcd|IDDM19|MDA-5|MDA5|RLR-2|SGMRT1	interferon induced, with helicase C domain 1	IFIH1	175	16	3.59432	3.95094e-05	0.00104011
hsa05164	Influenza A	TLR3	CD283|IIAE2	toll like receptor 3	TLR3	175	16	3.59432	3.95094e-05	0.00104011
hsa05164	Influenza A	PIK3CA	CLOVE|CWS5|MCAP|MCM|MCMTC|PI3K|p110-alpha	phosphatidylinositol-4,5-bisphosphate 3-kinase catalytic subunit alpha	PIK3C	175	16	3.59432	3.95094e-05	0.00104011
hsa05164	Influenza A	IL1B	IL-1|IL1-BETA|IL1F2	interleukin 1 beta	IL1B	175	16	3.59432	3.95094e-05	0.00104011
hsa05164	Influenza A	IL6	BSF-2|BSF2|CDF|HGF|HSF|IFN-beta-2|IFNB2|IL-6	interleukin 6	IL6	175	16	3.59432	3.95094e-05	0.00104011
hsa05164	Influenza A	CXCL8	GCP-1|GCP1|IL8|LECT|LUCT|LYNAP|MDNCF|MONAP|NAF|NAP-1|NAP1	chemokine (C-X-C motif) ligand 8	IL8	175	16	3.59432	3.95094e-05	0.00104011
hsa05164	Influenza A	ICAM1	BB2|CD54|P3.58	intercellular adhesion molecule 1	ICAM1	175	16	3.59432	3.95094e-05	0.00104011
hsa05164	Influenza A	SOCS3	ATOD4|CIS3|Cish3|SOCS-3|SSI-3|SSI3	suppressor of cytokine signaling 3	SOCS3	175	16	3.59432	3.95094e-05	0.00104011
hsa05164	Influenza A	HLA-DQA1	CD|CELIAC1|DQ-A1|GSE|HLA-DQA	major histocompatibility complex, class II, DQ alpha 1	MHC2	175	16	3.59432	3.95094e-05	0.00104011
hsa05164	Influenza A	HLA-DRB4	DR-4|DR4|DRB4|HLA-DR4B	major histocompatibility complex, class II, DR beta 4	MHC2	175	16	3.59432	3.95094e-05	0.00104011
hsa05164	Influenza A	FAS	ALPS1A|APO-1|APT1|CD95|FAS1|FASTM|TNFRSF6	Fas cell surface death receptor	TNFRSF6	175	16	3.59432	3.95094e-05	0.00104011
hsa05164	Influenza A	RSAD2	2510004L01Rik|cig33|cig5|vig1	radical S-adenosyl methionine domain containing 2	RSAD2	175	16	3.59432	3.95094e-05	0.00104011
hsa05164	Influenza A	IVNS1ABP	FLARA3|HSPC068|KLHL39|ND1|NS-1|NS1-BP|NS1BP	influenza virus NS1A binding protein	NS1BP	175	16	3.59432	3.95094e-05	0.00104011
hsa05168	Herpes simplex infection	FOS	AP-1|C-FOS|p55	FBJ murine osteosarcoma viral oncogene homolog	FOS	185	16	3.40003	7.21532e-05	0.00104011
hsa05168	Herpes simplex infection	TLR3	CD283|IIAE2	toll like receptor 3	TLR3	185	16	3.40003	7.21532e-05	0.00104011
hsa05168	Herpes simplex infection	DDX58	RIG-I|RIGI|RLR-1|SGMRT2	DEXD/H-box helicase 58	DDX58	185	16	3.40003	7.21532e-05	0.00104011
hsa05168	Herpes simplex infection	IFIH1	AGS7|Hlcd|IDDM19|MDA-5|MDA5|RLR-2|SGMRT1	interferon induced, with helicase C domain 1	IFIH1	185	16	3.40003	7.21532e-05	0.00104011
hsa05168	Herpes simplex infection	IL1B	IL-1|IL1-BETA|IL1F2	interleukin 1 beta	IL1B	185	16	3.40003	7.21532e-05	0.00104011
hsa05168	Herpes simplex infection	IL6	BSF-2|BSF2|CDF|HGF|HSF|IFN-beta-2|IFNB2|IL-6	interleukin 6	IL6	185	16	3.40003	7.21532e-05	0.00104011
hsa05168	Herpes simplex infection	IFIT1	C56|G10P1|IFI-56|IFI-56K|IFI56|IFIT-1|IFNAI1|ISG56|P56|RNM561	interferon induced protein with tetratricopeptide repeats 1	IFIT1	185	16	3.40003	7.21532e-05	0.00104011
hsa05168	Herpes simplex infection	EIF2AK2	EIF2AK1|PKR|PPP1R83|PRKR	eukaryotic translation initiation factor 2 alpha kinase 2	EIF2AK2	185	16	3.40003	7.21532e-05	0.00104011
hsa05168	Herpes simplex infection	SRSF1	ASF|SF2|SF2p33|SFRS1|SRp30a	serine/arginine-rich splicing factor 1	SFRS1_9	185	16	3.40003	7.21532e-05	0.00104011
hsa05168	Herpes simplex infection	SP100	lysp100b	SP100 nuclear antigen	SP100	185	16	3.40003	7.21532e-05	0.00104011
hsa05168	Herpes simplex infection	HLA-DQA1	CD|CELIAC1|DQ-A1|GSE|HLA-DQA	major histocompatibility complex, class II, DQ alpha 1	MHC2	185	16	3.40003	7.21532e-05	0.00104011
hsa05168	Herpes simplex infection	HLA-DRB4	DR-4|DR4|DRB4|HLA-DR4B	major histocompatibility complex, class II, DR beta 4	MHC2	185	16	3.40003	7.21532e-05	0.00104011
hsa05168	Herpes simplex infection	HLA-C	D6S204|HLA-JY3|HLAC|HLC-C|PSORS1	major histocompatibility complex, class I, C	MHC1	185	16	3.40003	7.21532e-05	0.00104011
hsa05168	Herpes simplex infection	SOCS3	ATOD4|CIS3|Cish3|SOCS-3|SSI-3|SSI3	suppressor of cytokine signaling 3	SOCS3	185	16	3.40003	7.21532e-05	0.00104011
hsa05168	Herpes simplex infection	FAS	ALPS1A|APO-1|APT1|CD95|FAS1|FASTM|TNFRSF6	Fas cell surface death receptor	TNFRSF6	185	16	3.40003	7.21532e-05	0.00104011
hsa05168	Herpes simplex infection	CLOCK	KAT13D|bHLHe8	clock circadian regulator	CLOCK	185	16	3.40003	7.21532e-05	0.00104011
hsa04064	NF-kappa B signaling pathway	IL1B	IL-1|IL1-BETA|IL1F2	interleukin 1 beta	IL1B	93	11	4.64991	7.33582e-05	0.00104011
hsa04064	NF-kappa B signaling pathway	BIRC2	API1|HIAP2|Hiap-2|MIHB|RNF48|c-IAP1|cIAP1	baculoviral IAP repeat containing 2	BIRC2_3	93	11	4.64991	7.33582e-05	0.00104011
hsa04064	NF-kappa B signaling pathway	DDX58	RIG-I|RIGI|RLR-1|SGMRT2	DEXD/H-box helicase 58	DDX58	93	11	4.64991	7.33582e-05	0.00104011
hsa04064	NF-kappa B signaling pathway	TNFSF13B	BAFF|BLYS|CD257|DTL|TALL-1|TALL1|THANK|TNFSF20|TNLG7A|ZTNF4	tumor necrosis factor superfamily member 13b	TNFSF13B	93	11	4.64991	7.33582e-05	0.00104011
hsa04064	NF-kappa B signaling pathway	BCL2A1	ACC-1|ACC-2|ACC1|ACC2|BCL2L5|BFL1|GRS|HBPA1	BCL2 related protein A1	BCL2A1	93	11	4.64991	7.33582e-05	0.00104011
hsa04064	NF-kappa B signaling pathway	CXCL8	GCP-1|GCP1|IL8|LECT|LUCT|LYNAP|MDNCF|MONAP|NAF|NAP-1|NAP1	chemokine (C-X-C motif) ligand 8	IL8	93	11	4.64991	7.33582e-05	0.00104011
hsa04064	NF-kappa B signaling pathway	TNFAIP3	A20|AISBL|OTUD7C|TNFA1P2	TNF alpha induced protein 3	TNFAIP3	93	11	4.64991	7.33582e-05	0.00104011
hsa04064	NF-kappa B signaling pathway	PTGS2	COX-2|COX2|GRIPGHS|PGG/HS|PGHS-2|PHS-2|hCox-2	prostaglandin-endoperoxide synthase 2 (prostaglandin G/H synthase and cyclooxygenase)	PTGS2	93	11	4.64991	7.33582e-05	0.00104011
hsa04064	NF-kappa B signaling pathway	ICAM1	BB2|CD54|P3.58	intercellular adhesion molecule 1	ICAM1	93	11	4.64991	7.33582e-05	0.00104011
hsa04064	NF-kappa B signaling pathway	CXCL2	CINC-2a|GRO2|GROb|MGSA-b|MIP-2a|MIP2|MIP2A|SCYB2	chemokine (C-X-C motif) ligand 2	CXCL1_2_3	93	11	4.64991	7.33582e-05	0.00104011
hsa04064	NF-kappa B signaling pathway	GADD45B	GADD45BETA|MYD118	growth arrest and DNA damage inducible beta	GADD45	93	11	4.64991	7.33582e-05	0.00104011
hsa05323	Rheumatoid arthritis	HLA-DQA1	CD|CELIAC1|DQ-A1|GSE|HLA-DQA	major histocompatibility complex, class II, DQ alpha 1	MHC2	90	10	4.36809	0.00024028	0.00289064
hsa05323	Rheumatoid arthritis	HLA-DRB4	DR-4|DR4|DRB4|HLA-DR4B	major histocompatibility complex, class II, DR beta 4	MHC2	90	10	4.36809	0.00024028	0.00289064
hsa05323	Rheumatoid arthritis	ICAM1	BB2|CD54|P3.58	intercellular adhesion molecule 1	ICAM1	90	10	4.36809	0.00024028	0.00289064
hsa05323	Rheumatoid arthritis	TNFSF13B	BAFF|BLYS|CD257|DTL|TALL-1|TALL1|THANK|TNFSF20|TNLG7A|ZTNF4	tumor necrosis factor superfamily member 13b	TNFSF13B	90	10	4.36809	0.00024028	0.00289064
hsa05323	Rheumatoid arthritis	IL1B	IL-1|IL1-BETA|IL1F2	interleukin 1 beta	IL1B	90	10	4.36809	0.00024028	0.00289064
hsa05323	Rheumatoid arthritis	IL6	BSF-2|BSF2|CDF|HGF|HSF|IFN-beta-2|IFNB2|IL-6	interleukin 6	IL6	90	10	4.36809	0.00024028	0.00289064
hsa05323	Rheumatoid arthritis	FOS	AP-1|C-FOS|p55	FBJ murine osteosarcoma viral oncogene homolog	FOS	90	10	4.36809	0.00024028	0.00289064
hsa05323	Rheumatoid arthritis	ATP6V1D	ATP6M|VATD|VMA8	ATPase, H+ transporting, lysosomal 34kDa, V1 subunit D	ATPeV1D	90	10	4.36809	0.00024028	0.00289064
hsa05323	Rheumatoid arthritis	CXCL8	GCP-1|GCP1|IL8|LECT|LUCT|LYNAP|MDNCF|MONAP|NAF|NAP-1|NAP1	chemokine (C-X-C motif) ligand 8	IL8	90	10	4.36809	0.00024028	0.00289064
hsa05323	Rheumatoid arthritis	ANGPT1	AGP1|AGPT|ANG1	angiopoietin 1	ANGPT1	90	10	4.36809	0.00024028	0.00289064
hsa05332	Graft-versus-host disease	IL6	BSF-2|BSF2|CDF|HGF|HSF|IFN-beta-2|IFNB2|IL-6	interleukin 6	IL6	41	6	5.7531	0.00113456	0.011581
hsa05332	Graft-versus-host disease	IL1B	IL-1|IL1-BETA|IL1F2	interleukin 1 beta	IL1B	41	6	5.7531	0.00113456	0.011581
hsa05332	Graft-versus-host disease	HLA-DQA1	CD|CELIAC1|DQ-A1|GSE|HLA-DQA	major histocompatibility complex, class II, DQ alpha 1	MHC2	41	6	5.7531	0.00113456	0.011581
hsa05332	Graft-versus-host disease	HLA-DRB4	DR-4|DR4|DRB4|HLA-DR4B	major histocompatibility complex, class II, DR beta 4	MHC2	41	6	5.7531	0.00113456	0.011581
hsa05332	Graft-versus-host disease	HLA-C	D6S204|HLA-JY3|HLAC|HLC-C|PSORS1	major histocompatibility complex, class I, C	MHC1	41	6	5.7531	0.00113456	0.011581
hsa05332	Graft-versus-host disease	FAS	ALPS1A|APO-1|APT1|CD95|FAS1|FASTM|TNFRSF6	Fas cell surface death receptor	TNFRSF6	41	6	5.7531	0.00113456	0.011581
hsa04621	NOD-like receptor signaling pathway	CXCL8	GCP-1|GCP1|IL8|LECT|LUCT|LYNAP|MDNCF|MONAP|NAF|NAP-1|NAP1	chemokine (C-X-C motif) ligand 8	IL8	57	7	4.82789	0.00115226	0.011581
hsa04621	NOD-like receptor signaling pathway	IL6	BSF-2|BSF2|CDF|HGF|HSF|IFN-beta-2|IFNB2|IL-6	interleukin 6	IL6	57	7	4.82789	0.00115226	0.011581
hsa04621	NOD-like receptor signaling pathway	BIRC2	API1|HIAP2|Hiap-2|MIHB|RNF48|c-IAP1|cIAP1	baculoviral IAP repeat containing 2	BIRC2_3	57	7	4.82789	0.00115226	0.011581
hsa04621	NOD-like receptor signaling pathway	TNFAIP3	A20|AISBL|OTUD7C|TNFA1P2	TNF alpha induced protein 3	TNFAIP3	57	7	4.82789	0.00115226	0.011581
hsa04621	NOD-like receptor signaling pathway	NAIP	BIRC1|NLRB1|psiNAIP	NLR family, apoptosis inhibitory protein	NAIP	57	7	4.82789	0.00115226	0.011581
hsa04621	NOD-like receptor signaling pathway	IL1B	IL-1|IL1-BETA|IL1F2	interleukin 1 beta	IL1B	57	7	4.82789	0.00115226	0.011581
hsa04621	NOD-like receptor signaling pathway	CXCL2	CINC-2a|GRO2|GROb|MGSA-b|MIP-2a|MIP2|MIP2A|SCYB2	chemokine (C-X-C motif) ligand 2	CXCL1_2_3	57	7	4.82789	0.00115226	0.011581
hsa05144	Malaria	CXCL8	GCP-1|GCP1|IL8|LECT|LUCT|LYNAP|MDNCF|MONAP|NAF|NAP-1|NAP1	chemokine (C-X-C motif) ligand 8	IL8	49	6	4.81382	0.00257518	0.0240552
hsa05144	Malaria	IL6	BSF-2|BSF2|CDF|HGF|HSF|IFN-beta-2|IFNB2|IL-6	interleukin 6	IL6	49	6	4.81382	0.00257518	0.0240552
hsa05144	Malaria	IL1B	IL-1|IL1-BETA|IL1F2	interleukin 1 beta	IL1B	49	6	4.81382	0.00257518	0.0240552
hsa05144	Malaria	THBS1	THBS|THBS-1|TSP|TSP-1|TSP1	thrombospondin 1	THBS1	49	6	4.81382	0.00257518	0.0240552
hsa05144	Malaria	SELE	CD62E|ELAM|ELAM1|ESEL|LECAM2	selectin E	SELE	49	6	4.81382	0.00257518	0.0240552
hsa05144	Malaria	ICAM1	BB2|CD54|P3.58	intercellular adhesion molecule 1	ICAM1	49	6	4.81382	0.00257518	0.0240552
hsa05143	African trypanosomiasis	IL1B	IL-1|IL1-BETA|IL1F2	interleukin 1 beta	IL1B	35	5	5.61612	0.0031803	0.0280573
hsa05143	African trypanosomiasis	IL6	BSF-2|BSF2|CDF|HGF|HSF|IFN-beta-2|IFNB2|IL-6	interleukin 6	IL6	35	5	5.61612	0.0031803	0.0280573
hsa05143	African trypanosomiasis	FAS	ALPS1A|APO-1|APT1|CD95|FAS1|FASTM|TNFRSF6	Fas cell surface death receptor	TNFRSF6	35	5	5.61612	0.0031803	0.0280573
hsa05143	African trypanosomiasis	SELE	CD62E|ELAM|ELAM1|ESEL|LECAM2	selectin E	SELE	35	5	5.61612	0.0031803	0.0280573
hsa05143	African trypanosomiasis	ICAM1	BB2|CD54|P3.58	intercellular adhesion molecule 1	ICAM1	35	5	5.61612	0.0031803	0.0280573
hsa05162	Measles	CD46	AHUS2|MCP|MIC10|TLX|TRA2.10	CD46 molecule	CD46	136	10	2.89065	0.00422748	0.0324587
hsa05162	Measles	PIK3CA	CLOVE|CWS5|MCAP|MCM|MCMTC|PI3K|p110-alpha	phosphatidylinositol-4,5-bisphosphate 3-kinase catalytic subunit alpha	PIK3C	136	10	2.89065	0.00422748	0.0324587
hsa05162	Measles	DDX58	RIG-I|RIGI|RLR-1|SGMRT2	DEXD/H-box helicase 58	DDX58	136	10	2.89065	0.00422748	0.0324587
hsa05162	Measles	IFIH1	AGS7|Hlcd|IDDM19|MDA-5|MDA5|RLR-2|SGMRT1	interferon induced, with helicase C domain 1	IFIH1	136	10	2.89065	0.00422748	0.0324587
hsa05162	Measles	TNFAIP3	A20|AISBL|OTUD7C|TNFA1P2	TNF alpha induced protein 3	TNFAIP3	136	10	2.89065	0.00422748	0.0324587
hsa05162	Measles	IL1B	IL-1|IL1-BETA|IL1F2	interleukin 1 beta	IL1B	136	10	2.89065	0.00422748	0.0324587
hsa05162	Measles	IL6	BSF-2|BSF2|CDF|HGF|HSF|IFN-beta-2|IFNB2|IL-6	interleukin 6	IL6	136	10	2.89065	0.00422748	0.0324587
hsa05162	Measles	HSPA1B	HSP70-1B|HSP70-2|HSP70.2	heat shock protein family A (Hsp70) member 1B	HSPA1_8	136	10	2.89065	0.00422748	0.0324587
hsa05162	Measles	EIF2AK2	EIF2AK1|PKR|PPP1R83|PRKR	eukaryotic translation initiation factor 2 alpha kinase 2	EIF2AK2	136	10	2.89065	0.00422748	0.0324587
hsa05162	Measles	FAS	ALPS1A|APO-1|APT1|CD95|FAS1|FASTM|TNFRSF6	Fas cell surface death receptor	TNFRSF6	136	10	2.89065	0.00422748	0.0324587
hsa05134	Legionellosis	HSPA1B	HSP70-1B|HSP70-2|HSP70.2	heat shock protein family A (Hsp70) member 1B	HSPA1_8	55	6	4.28867	0.00433328	0.0324587
hsa05134	Legionellosis	NAIP	BIRC1|NLRB1|psiNAIP	NLR family, apoptosis inhibitory protein	NAIP	55	6	4.28867	0.00433328	0.0324587
hsa05134	Legionellosis	IL1B	IL-1|IL1-BETA|IL1F2	interleukin 1 beta	IL1B	55	6	4.28867	0.00433328	0.0324587
hsa05134	Legionellosis	IL6	BSF-2|BSF2|CDF|HGF|HSF|IFN-beta-2|IFNB2|IL-6	interleukin 6	IL6	55	6	4.28867	0.00433328	0.0324587
hsa05134	Legionellosis	CXCL8	GCP-1|GCP1|IL8|LECT|LUCT|LYNAP|MDNCF|MONAP|NAF|NAP-1|NAP1	chemokine (C-X-C motif) ligand 8	IL8	55	6	4.28867	0.00433328	0.0324587
hsa05134	Legionellosis	CXCL2	CINC-2a|GRO2|GROb|MGSA-b|MIP-2a|MIP2|MIP2A|SCYB2	chemokine (C-X-C motif) ligand 2	CXCL1_2_3	55	6	4.28867	0.00433328	0.0324587
hsa05161	Hepatitis B	EGR2	AT591|CMT1D|CMT4E|KROX20	early growth response 2	EGR2	146	10	2.69266	0.00665695	0.0455657
hsa05161	Hepatitis B	EGR3	EGR-3|PILOT	early growth response 3	EGR3	146	10	2.69266	0.00665695	0.0455657
hsa05161	Hepatitis B	FAS	ALPS1A|APO-1|APT1|CD95|FAS1|FASTM|TNFRSF6	Fas cell surface death receptor	TNFRSF6	146	10	2.69266	0.00665695	0.0455657
hsa05161	Hepatitis B	PIK3CA	CLOVE|CWS5|MCAP|MCM|MCMTC|PI3K|p110-alpha	phosphatidylinositol-4,5-bisphosphate 3-kinase catalytic subunit alpha	PIK3C	146	10	2.69266	0.00665695	0.0455657
hsa05161	Hepatitis B	CXCL8	GCP-1|GCP1|IL8|LECT|LUCT|LYNAP|MDNCF|MONAP|NAF|NAP-1|NAP1	chemokine (C-X-C motif) ligand 8	IL8	146	10	2.69266	0.00665695	0.0455657
hsa05161	Hepatitis B	FOS	AP-1|C-FOS|p55	FBJ murine osteosarcoma viral oncogene homolog	FOS	146	10	2.69266	0.00665695	0.0455657
hsa05161	Hepatitis B	TLR3	CD283|IIAE2	toll like receptor 3	TLR3	146	10	2.69266	0.00665695	0.0455657
hsa05161	Hepatitis B	DDX58	RIG-I|RIGI|RLR-1|SGMRT2	DEXD/H-box helicase 58	DDX58	146	10	2.69266	0.00665695	0.0455657
hsa05161	Hepatitis B	IFIH1	AGS7|Hlcd|IDDM19|MDA-5|MDA5|RLR-2|SGMRT1	interferon induced, with helicase C domain 1	IFIH1	146	10	2.69266	0.00665695	0.0455657
hsa05161	Hepatitis B	IL6	BSF-2|BSF2|CDF|HGF|HSF|IFN-beta-2|IFNB2|IL-6	interleukin 6	IL6	146	10	2.69266	0.00665695	0.0455657
hsa04940	Type I diabetes mellitus	HLA-DQA1	CD|CELIAC1|DQ-A1|GSE|HLA-DQA	major histocompatibility complex, class II, DQ alpha 1	MHC2	43	5	4.57126	0.00700069	0.0459384
hsa04940	Type I diabetes mellitus	HLA-DRB4	DR-4|DR4|DRB4|HLA-DR4B	major histocompatibility complex, class II, DR beta 4	MHC2	43	5	4.57126	0.00700069	0.0459384
hsa04940	Type I diabetes mellitus	HLA-C	D6S204|HLA-JY3|HLAC|HLC-C|PSORS1	major histocompatibility complex, class I, C	MHC1	43	5	4.57126	0.00700069	0.0459384
hsa04940	Type I diabetes mellitus	FAS	ALPS1A|APO-1|APT1|CD95|FAS1|FASTM|TNFRSF6	Fas cell surface death receptor	TNFRSF6	43	5	4.57126	0.00700069	0.0459384
hsa04940	Type I diabetes mellitus	IL1B	IL-1|IL1-BETA|IL1F2	interleukin 1 beta	IL1B	43	5	4.57126	0.00700069	0.0459384
hsa04742	Taste transduction	TAS2R19	MSTP058|T2R19|T2R23|T2R48|TAS2R23|TAS2R48	taste 2 receptor member 19	TAS2R	83	7	3.31554	0.00781152	0.0476817
hsa04742	Taste transduction	TAS2R20	T2R20|T2R49|T2R56|TAS2R49	taste 2 receptor member 20	TAS2R	83	7	3.31554	0.00781152	0.0476817
hsa04742	Taste transduction	TAS2R50	T2R50|T2R51|TAS2R51	taste 2 receptor member 50	TAS2R	83	7	3.31554	0.00781152	0.0476817
hsa04742	Taste transduction	TAS2R13	T2R13|TRB3	taste 2 receptor member 13	TAS2R	83	7	3.31554	0.00781152	0.0476817
hsa04742	Taste transduction	TAS2R14	T2R14|TRB1	taste 2 receptor member 14	TAS2R	83	7	3.31554	0.00781152	0.0476817
hsa04742	Taste transduction	TAS2R30	T2R30|T2R47|TAS2R47	taste 2 receptor member 30	TAS2R	83	7	3.31554	0.00781152	0.0476817
hsa04742	Taste transduction	PDE1A	CAM-PDE-1A|HCAM-1|HCAM1|HSPDE1A	phosphodiesterase 1A	PDE1	83	7	3.31554	0.00781152	0.0476817
hsa05410	Hypertrophic cardiomyopathy (HCM)	ITGA1	CD49a|VLA1	integrin subunit alpha 1	ITGA1	85	7	3.23753	0.0087676	0.0476817
hsa05410	Hypertrophic cardiomyopathy (HCM)	ITGB8	-	integrin subunit beta 8	ITGB8	85	7	3.23753	0.0087676	0.0476817
hsa05410	Hypertrophic cardiomyopathy (HCM)	TTN	CMD1G|CMH9|CMPD4|EOMFC|HMERF|LGMD2J|MYLK5|TMD	titin	TTN	85	7	3.23753	0.0087676	0.0476817
hsa05410	Hypertrophic cardiomyopathy (HCM)	CACNB4	CAB4|CACNLB4|EA5|EIG9|EJM|EJM4|EJM6	calcium channel, voltage-dependent, beta 4 subunit	CACNB4	85	7	3.23753	0.0087676	0.0476817
hsa05410	Hypertrophic cardiomyopathy (HCM)	PRKAA2	AMPK|AMPK2|AMPKa2|PRKAA	protein kinase, AMP-activated, alpha 2 catalytic subunit	PRKAA	85	7	3.23753	0.0087676	0.0476817
hsa05410	Hypertrophic cardiomyopathy (HCM)	IL6	BSF-2|BSF2|CDF|HGF|HSF|IFN-beta-2|IFNB2|IL-6	interleukin 6	IL6	85	7	3.23753	0.0087676	0.0476817
hsa05410	Hypertrophic cardiomyopathy (HCM)	CACNA2D1	CACNA2|CACNL2A|CCHL2A|LINC01112|lncRNA-N3	calcium channel, voltage-dependent, alpha 2/delta subunit 1	CACNA2D1	85	7	3.23753	0.0087676	0.0476817
hsa04145	Phagosome	HLA-C	D6S204|HLA-JY3|HLAC|HLC-C|PSORS1	major histocompatibility complex, class I, C	MHC1	154	10	2.55278	0.00928055	0.0476817
hsa04145	Phagosome	HLA-DQA1	CD|CELIAC1|DQ-A1|GSE|HLA-DQA	major histocompatibility complex, class II, DQ alpha 1	MHC2	154	10	2.55278	0.00928055	0.0476817
hsa04145	Phagosome	HLA-DRB4	DR-4|DR4|DRB4|HLA-DR4B	major histocompatibility complex, class II, DR beta 4	MHC2	154	10	2.55278	0.00928055	0.0476817
hsa04145	Phagosome	TFRC	CD71|IMD46|T9|TFR|TFR1|TR|TRFR|p90	transferrin receptor	TFRC	154	10	2.55278	0.00928055	0.0476817
hsa04145	Phagosome	ATP6V1D	ATP6M|VATD|VMA8	ATPase, H+ transporting, lysosomal 34kDa, V1 subunit D	ATPeV1D	154	10	2.55278	0.00928055	0.0476817
hsa04145	Phagosome	DYNC2H1	ATD3|DHC1b|DHC2|DNCH2|DYH1B|SRPS2B|SRTD3|hdhc11	dynein, cytoplasmic 2, heavy chain 1	DYNC2H	154	10	2.55278	0.00928055	0.0476817
hsa04145	Phagosome	FCGR3B	CD16|CD16b|FCG3|FCGR3|FCR-10|FCRIII|FCRIIIb	Fc fragment of IgG receptor IIIb	FCGR3	154	10	2.55278	0.00928055	0.0476817
hsa04145	Phagosome	THBS1	THBS|THBS-1|TSP|TSP-1|TSP1	thrombospondin 1	THBS1	154	10	2.55278	0.00928055	0.0476817
hsa04145	Phagosome	PLA2R1	CLEC13C|PLA2-R|PLA2G1R|PLA2IR|PLA2R	phospholipase A2 receptor 1	MRC	154	10	2.55278	0.00928055	0.0476817
hsa04145	Phagosome	CLEC7A	BGR|CANDF4|CD369|CLECSF12|DECTIN1	C-type lectin domain family 7 member A	CLEC7A	154	10	2.55278	0.00928055	0.0476817
hsa04010	MAPK signaling pathway	CACNB4	CAB4|CACNLB4|EA5|EIG9|EJM|EJM4|EJM6	calcium channel, voltage-dependent, beta 4 subunit	CACNB4	255	14	2.15835	0.00954835	0.0476817
hsa04010	MAPK signaling pathway	RASA2	GAP1M	RAS p21 protein activator 2	RASA2	255	14	2.15835	0.00954835	0.0476817
hsa04010	MAPK signaling pathway	FGF1	AFGF|ECGF|ECGF-beta|ECGFA|ECGFB|FGF-1|FGF-alpha|FGFA|GLIO703|HBGF-1|HBGF1	fibroblast growth factor 1	FGF1	255	14	2.15835	0.00954835	0.0476817
hsa04010	MAPK signaling pathway	FGF7	HBGF-7|KGF	fibroblast growth factor 7	FGF	255	14	2.15835	0.00954835	0.0476817
hsa04010	MAPK signaling pathway	PDGFRA	CD140A|GAS9|PDGFR-2|PDGFR2|RHEPDGFRA	platelet derived growth factor receptor alpha	PDGFRA	255	14	2.15835	0.00954835	0.0476817
hsa04010	MAPK signaling pathway	FOS	AP-1|C-FOS|p55	FBJ murine osteosarcoma viral oncogene homolog	FOS	255	14	2.15835	0.00954835	0.0476817
hsa04010	MAPK signaling pathway	IL1B	IL-1|IL1-BETA|IL1F2	interleukin 1 beta	IL1B	255	14	2.15835	0.00954835	0.0476817
hsa04010	MAPK signaling pathway	FAS	ALPS1A|APO-1|APT1|CD95|FAS1|FASTM|TNFRSF6	Fas cell surface death receptor	TNFRSF6	255	14	2.15835	0.00954835	0.0476817
hsa04010	MAPK signaling pathway	GADD45B	GADD45BETA|MYD118	growth arrest and DNA damage inducible beta	GADD45	255	14	2.15835	0.00954835	0.0476817
hsa04010	MAPK signaling pathway	PPM1A	PP2C-ALPHA|PP2CA|PP2Calpha	protein phosphatase, Mg2+/Mn2+ dependent 1A	PPM1A	255	14	2.15835	0.00954835	0.0476817
hsa04010	MAPK signaling pathway	HSPA1B	HSP70-1B|HSP70-2|HSP70.2	heat shock protein family A (Hsp70) member 1B	HSPA1_8	255	14	2.15835	0.00954835	0.0476817
hsa04010	MAPK signaling pathway	NR4A1	GFRP1|HMR|N10|NAK-1|NGFIB|NP10|NUR77|TR3	nuclear receptor subfamily 4 group A member 1	NR4A1	255	14	2.15835	0.00954835	0.0476817
hsa04010	MAPK signaling pathway	CACNA2D1	CACNA2|CACNL2A|CCHL2A|LINC01112|lncRNA-N3	calcium channel, voltage-dependent, alpha 2/delta subunit 1	CACNA2D1	255	14	2.15835	0.00954835	0.0476817
hsa04010	MAPK signaling pathway	DDIT3	CEBPZ|CHOP|CHOP-10|CHOP10|GADD153	DNA damage inducible transcript 3	DDIT3	255	14	2.15835	0.00954835	0.0476817
hsa05140	Leishmaniasis	IL1B	IL-1|IL1-BETA|IL1F2	interleukin 1 beta	IL1B	73	6	3.23119	0.0147592	0.0681821
hsa05140	Leishmaniasis	FCGR3B	CD16|CD16b|FCG3|FCGR3|FCR-10|FCRIII|FCRIIIb	Fc fragment of IgG receptor IIIb	FCGR3	73	6	3.23119	0.0147592	0.0681821
hsa05140	Leishmaniasis	PTGS2	COX-2|COX2|GRIPGHS|PGG/HS|PGHS-2|PHS-2|hCox-2	prostaglandin-endoperoxide synthase 2 (prostaglandin G/H synthase and cyclooxygenase)	PTGS2	73	6	3.23119	0.0147592	0.0681821
hsa05140	Leishmaniasis	FOS	AP-1|C-FOS|p55	FBJ murine osteosarcoma viral oncogene homolog	FOS	73	6	3.23119	0.0147592	0.0681821
hsa05140	Leishmaniasis	HLA-DQA1	CD|CELIAC1|DQ-A1|GSE|HLA-DQA	major histocompatibility complex, class II, DQ alpha 1	MHC2	73	6	3.23119	0.0147592	0.0681821
hsa05140	Leishmaniasis	HLA-DRB4	DR-4|DR4|DRB4|HLA-DR4B	major histocompatibility complex, class II, DR beta 4	MHC2	73	6	3.23119	0.0147592	0.0681821
hsa04514	Cell adhesion molecules (CAMs)	CD58	LFA-3|LFA3|ag3	CD58 molecule	CD58	142	9	2.49166	0.0149417	0.0681821
hsa04514	Cell adhesion molecules (CAMs)	HLA-DQA1	CD|CELIAC1|DQ-A1|GSE|HLA-DQA	major histocompatibility complex, class II, DQ alpha 1	MHC2	142	9	2.49166	0.0149417	0.0681821
hsa04514	Cell adhesion molecules (CAMs)	HLA-DRB4	DR-4|DR4|DRB4|HLA-DR4B	major histocompatibility complex, class II, DR beta 4	MHC2	142	9	2.49166	0.0149417	0.0681821
hsa04514	Cell adhesion molecules (CAMs)	HLA-C	D6S204|HLA-JY3|HLAC|HLC-C|PSORS1	major histocompatibility complex, class I, C	MHC1	142	9	2.49166	0.0149417	0.0681821
hsa04514	Cell adhesion molecules (CAMs)	ALCAM	CD166|MEMD	activated leukocyte cell adhesion molecule	ALCAM	142	9	2.49166	0.0149417	0.0681821
hsa04514	Cell adhesion molecules (CAMs)	ICAM1	BB2|CD54|P3.58	intercellular adhesion molecule 1	ICAM1	142	9	2.49166	0.0149417	0.0681821
hsa04514	Cell adhesion molecules (CAMs)	SELE	CD62E|ELAM|ELAM1|ESEL|LECAM2	selectin E	SELE	142	9	2.49166	0.0149417	0.0681821
hsa04514	Cell adhesion molecules (CAMs)	ITGB8	-	integrin subunit beta 8	ITGB8	142	9	2.49166	0.0149417	0.0681821
hsa04514	Cell adhesion molecules (CAMs)	NRXN1	Hs.22998|PTHSL2|SCZD17	neurexin 1	NRXN	142	9	2.49166	0.0149417	0.0681821
hsa04933	AGE-RAGE signaling pathway in diabetic complications	SELE	CD62E|ELAM|ELAM1|ESEL|LECAM2	selectin E	SELE	101	7	2.72465	0.0197103	0.0854105
hsa04933	AGE-RAGE signaling pathway in diabetic complications	ICAM1	BB2|CD54|P3.58	intercellular adhesion molecule 1	ICAM1	101	7	2.72465	0.0197103	0.0854105
hsa04933	AGE-RAGE signaling pathway in diabetic complications	IL1B	IL-1|IL1-BETA|IL1F2	interleukin 1 beta	IL1B	101	7	2.72465	0.0197103	0.0854105
hsa04933	AGE-RAGE signaling pathway in diabetic complications	IL6	BSF-2|BSF2|CDF|HGF|HSF|IFN-beta-2|IFNB2|IL-6	interleukin 6	IL6	101	7	2.72465	0.0197103	0.0854105
hsa04933	AGE-RAGE signaling pathway in diabetic complications	CXCL8	GCP-1|GCP1|IL8|LECT|LUCT|LYNAP|MDNCF|MONAP|NAF|NAP-1|NAP1	chemokine (C-X-C motif) ligand 8	IL8	101	7	2.72465	0.0197103	0.0854105
hsa04933	AGE-RAGE signaling pathway in diabetic complications	PIK3CA	CLOVE|CWS5|MCAP|MCM|MCMTC|PI3K|p110-alpha	phosphatidylinositol-4,5-bisphosphate 3-kinase catalytic subunit alpha	PIK3C	101	7	2.72465	0.0197103	0.0854105
hsa04933	AGE-RAGE signaling pathway in diabetic complications	EGR1	AT225|G0S30|KROX-24|NGFI-A|TIS8|ZIF-268|ZNF225	early growth response 1	EGR1	101	7	2.72465	0.0197103	0.0854105
hsa05330	Allograft rejection	HLA-C	D6S204|HLA-JY3|HLAC|HLC-C|PSORS1	major histocompatibility complex, class I, C	MHC1	38	4	4.13819	0.0207601	0.0854105
hsa05330	Allograft rejection	FAS	ALPS1A|APO-1|APT1|CD95|FAS1|FASTM|TNFRSF6	Fas cell surface death receptor	TNFRSF6	38	4	4.13819	0.0207601	0.0854105
hsa05330	Allograft rejection	HLA-DQA1	CD|CELIAC1|DQ-A1|GSE|HLA-DQA	major histocompatibility complex, class II, DQ alpha 1	MHC2	38	4	4.13819	0.0207601	0.0854105
hsa05330	Allograft rejection	HLA-DRB4	DR-4|DR4|DRB4|HLA-DR4B	major histocompatibility complex, class II, DR beta 4	MHC2	38	4	4.13819	0.0207601	0.0854105
hsa04932	Non-alcoholic fatty liver disease (NAFLD)	IL6	BSF-2|BSF2|CDF|HGF|HSF|IFN-beta-2|IFNB2|IL-6	interleukin 6	IL6	151	9	2.34315	0.0208686	0.0854105
hsa04932	Non-alcoholic fatty liver disease (NAFLD)	SOCS3	ATOD4|CIS3|Cish3|SOCS-3|SSI-3|SSI3	suppressor of cytokine signaling 3	SOCS3	151	9	2.34315	0.0208686	0.0854105
hsa04932	Non-alcoholic fatty liver disease (NAFLD)	PIK3CA	CLOVE|CWS5|MCAP|MCM|MCMTC|PI3K|p110-alpha	phosphatidylinositol-4,5-bisphosphate 3-kinase catalytic subunit alpha	PIK3C	151	9	2.34315	0.0208686	0.0854105
hsa04932	Non-alcoholic fatty liver disease (NAFLD)	PRKAA2	AMPK|AMPK2|AMPKa2|PRKAA	protein kinase, AMP-activated, alpha 2 catalytic subunit	PRKAA	151	9	2.34315	0.0208686	0.0854105
hsa04932	Non-alcoholic fatty liver disease (NAFLD)	IL1B	IL-1|IL1-BETA|IL1F2	interleukin 1 beta	IL1B	151	9	2.34315	0.0208686	0.0854105
hsa04932	Non-alcoholic fatty liver disease (NAFLD)	CXCL8	GCP-1|GCP1|IL8|LECT|LUCT|LYNAP|MDNCF|MONAP|NAF|NAP-1|NAP1	chemokine (C-X-C motif) ligand 8	IL8	151	9	2.34315	0.0208686	0.0854105
hsa04932	Non-alcoholic fatty liver disease (NAFLD)	FAS	ALPS1A|APO-1|APT1|CD95|FAS1|FASTM|TNFRSF6	Fas cell surface death receptor	TNFRSF6	151	9	2.34315	0.0208686	0.0854105
hsa04932	Non-alcoholic fatty liver disease (NAFLD)	NDUFB2	AGGG|CI-AGGG	NADH:ubiquinone oxidoreductase subunit B2	NDUFB2	151	9	2.34315	0.0208686	0.0854105
hsa04932	Non-alcoholic fatty liver disease (NAFLD)	DDIT3	CEBPZ|CHOP|CHOP-10|CHOP10|GADD153	DNA damage inducible transcript 3	DDIT3	151	9	2.34315	0.0208686	0.0854105
hsa05202	Transcriptional misregulation in cancers	BCL2A1	ACC-1|ACC-2|ACC1|ACC2|BCL2L5|BFL1|GRS|HBPA1	BCL2 related protein A1	BCL2A1	180	10	2.18405	0.0233382	0.090836
hsa05202	Transcriptional misregulation in cancers	JMJD1C	TRIP-8|TRIP8	jumonji domain containing 1C	JMJD1C	180	10	2.18405	0.0233382	0.090836
hsa05202	Transcriptional misregulation in cancers	REL	C-Rel	v-rel avian reticuloendotheliosis viral oncogene homolog	REL	180	10	2.18405	0.0233382	0.090836
hsa05202	Transcriptional misregulation in cancers	H3F3B	H3.3B	H3 histone, family 3B (H3.3B)	H3	180	10	2.18405	0.0233382	0.090836
hsa05202	Transcriptional misregulation in cancers	NR4A3	CHN|CSMF|MINOR|NOR1|TEC	nuclear receptor subfamily 4 group A member 3	NR4A3	180	10	2.18405	0.0233382	0.090836
hsa05202	Transcriptional misregulation in cancers	IL6	BSF-2|BSF2|CDF|HGF|HSF|IFN-beta-2|IFNB2|IL-6	interleukin 6	IL6	180	10	2.18405	0.0233382	0.090836
hsa05202	Transcriptional misregulation in cancers	NFKBIZ	IKBZ|INAP|MAIL	nuclear factor of kappa light polypeptide gene enhancer in B-cells inhibitor, zeta	NFKBIZ	180	10	2.18405	0.0233382	0.090836
hsa05202	Transcriptional misregulation in cancers	CXCL8	GCP-1|GCP1|IL8|LECT|LUCT|LYNAP|MDNCF|MONAP|NAF|NAP-1|NAP1	chemokine (C-X-C motif) ligand 8	IL8	180	10	2.18405	0.0233382	0.090836
hsa05202	Transcriptional misregulation in cancers	MEN1	MEAI|SCG2	menin 1	MEN1	180	10	2.18405	0.0233382	0.090836
hsa05202	Transcriptional misregulation in cancers	DDIT3	CEBPZ|CHOP|CHOP-10|CHOP10|GADD153	DNA damage inducible transcript 3	DDIT3	180	10	2.18405	0.0233382	0.090836
hsa05132	Salmonella infection	FOS	AP-1|C-FOS|p55	FBJ murine osteosarcoma viral oncogene homolog	FOS	86	6	2.74276	0.0287629	0.108751
hsa05132	Salmonella infection	IL1B	IL-1|IL1-BETA|IL1F2	interleukin 1 beta	IL1B	86	6	2.74276	0.0287629	0.108751
hsa05132	Salmonella infection	IL6	BSF-2|BSF2|CDF|HGF|HSF|IFN-beta-2|IFNB2|IL-6	interleukin 6	IL6	86	6	2.74276	0.0287629	0.108751
hsa05132	Salmonella infection	CXCL8	GCP-1|GCP1|IL8|LECT|LUCT|LYNAP|MDNCF|MONAP|NAF|NAP-1|NAP1	chemokine (C-X-C motif) ligand 8	IL8	86	6	2.74276	0.0287629	0.108751
hsa05132	Salmonella infection	CXCL2	CINC-2a|GRO2|GROb|MGSA-b|MIP-2a|MIP2|MIP2A|SCYB2	chemokine (C-X-C motif) ligand 2	CXCL1_2_3	86	6	2.74276	0.0287629	0.108751
hsa05132	Salmonella infection	DYNC2H1	ATD3|DHC1b|DHC2|DNCH2|DYH1B|SRPS2B|SRTD3|hdhc11	dynein, cytoplasmic 2, heavy chain 1	DYNC2H	86	6	2.74276	0.0287629	0.108751
hsa04672	Intestinal immune network for IgA production	HLA-DQA1	CD|CELIAC1|DQ-A1|GSE|HLA-DQA	major histocompatibility complex, class II, DQ alpha 1	MHC2	48	4	3.27607	0.0412481	0.153042
hsa04672	Intestinal immune network for IgA production	HLA-DRB4	DR-4|DR4|DRB4|HLA-DR4B	major histocompatibility complex, class II, DR beta 4	MHC2	48	4	3.27607	0.0412481	0.153042
hsa04672	Intestinal immune network for IgA production	IL6	BSF-2|BSF2|CDF|HGF|HSF|IFN-beta-2|IFNB2|IL-6	interleukin 6	IL6	48	4	3.27607	0.0412481	0.153042
hsa04672	Intestinal immune network for IgA production	TNFSF13B	BAFF|BLYS|CD257|DTL|TALL-1|TALL1|THANK|TNFSF20|TNLG7A|ZTNF4	tumor necrosis factor superfamily member 13b	TNFSF13B	48	4	3.27607	0.0412481	0.153042
hsa05169	Epstein-Barr virus infection	HLA-C	D6S204|HLA-JY3|HLAC|HLC-C|PSORS1	major histocompatibility complex, class I, C	MHC1	202	10	1.94618	0.0437796	0.155183
hsa05169	Epstein-Barr virus infection	HSPA1B	HSP70-1B|HSP70-2|HSP70.2	heat shock protein family A (Hsp70) member 1B	HSPA1_8	202	10	1.94618	0.0437796	0.155183
hsa05169	Epstein-Barr virus infection	PIK3CA	CLOVE|CWS5|MCAP|MCM|MCMTC|PI3K|p110-alpha	phosphatidylinositol-4,5-bisphosphate 3-kinase catalytic subunit alpha	PIK3C	202	10	1.94618	0.0437796	0.155183
hsa05169	Epstein-Barr virus infection	CD58	LFA-3|LFA3|ag3	CD58 molecule	CD58	202	10	1.94618	0.0437796	0.155183
hsa05169	Epstein-Barr virus infection	ICAM1	BB2|CD54|P3.58	intercellular adhesion molecule 1	ICAM1	202	10	1.94618	0.0437796	0.155183
hsa05169	Epstein-Barr virus infection	TNFAIP3	A20|AISBL|OTUD7C|TNFA1P2	TNF alpha induced protein 3	TNFAIP3	202	10	1.94618	0.0437796	0.155183
hsa05169	Epstein-Barr virus infection	DDX58	RIG-I|RIGI|RLR-1|SGMRT2	DEXD/H-box helicase 58	DDX58	202	10	1.94618	0.0437796	0.155183
hsa05169	Epstein-Barr virus infection	EIF2AK2	EIF2AK1|PKR|PPP1R83|PRKR	eukaryotic translation initiation factor 2 alpha kinase 2	EIF2AK2	202	10	1.94618	0.0437796	0.155183
hsa05169	Epstein-Barr virus infection	HLA-DQA1	CD|CELIAC1|DQ-A1|GSE|HLA-DQA	major histocompatibility complex, class II, DQ alpha 1	MHC2	202	10	1.94618	0.0437796	0.155183
hsa05169	Epstein-Barr virus infection	HLA-DRB4	DR-4|DR4|DRB4|HLA-DR4B	major histocompatibility complex, class II, DR beta 4	MHC2	202	10	1.94618	0.0437796	0.155183
hsa04710	Circadian rhythm	CLOCK	KAT13D|bHLHe8	clock circadian regulator	CLOCK	31	3	3.80447	0.052727	0.180639
hsa04710	Circadian rhythm	BHLHE40	BHLHB2|DEC1|HLHB2|SHARP-2|STRA13|Stra14	basic helix-loop-helix family member e40	BHLHB2	31	3	3.80447	0.052727	0.180639
hsa04710	Circadian rhythm	PRKAA2	AMPK|AMPK2|AMPKa2|PRKAA	protein kinase, AMP-activated, alpha 2 catalytic subunit	PRKAA	31	3	3.80447	0.052727	0.180639
hsa05320	Autoimmune thyroid disease	HLA-DQA1	CD|CELIAC1|DQ-A1|GSE|HLA-DQA	major histocompatibility complex, class II, DQ alpha 1	MHC2	53	4	2.96701	0.0545965	0.180639
hsa05320	Autoimmune thyroid disease	HLA-DRB4	DR-4|DR4|DRB4|HLA-DR4B	major histocompatibility complex, class II, DR beta 4	MHC2	53	4	2.96701	0.0545965	0.180639
hsa05320	Autoimmune thyroid disease	HLA-C	D6S204|HLA-JY3|HLAC|HLC-C|PSORS1	major histocompatibility complex, class I, C	MHC1	53	4	2.96701	0.0545965	0.180639
hsa05320	Autoimmune thyroid disease	FAS	ALPS1A|APO-1|APT1|CD95|FAS1|FASTM|TNFRSF6	Fas cell surface death receptor	TNFRSF6	53	4	2.96701	0.0545965	0.180639
hsa04015	Rap1 signaling pathway	RAPGEF5	GFR|MR-GEF|REPAC	Rap guanine nucleotide exchange factor 5	RAPGEF5	211	10	1.86317	0.0548288	0.180639
hsa04015	Rap1 signaling pathway	DOCK4	-	dedicator of cytokinesis 4	DOCK4	211	10	1.86317	0.0548288	0.180639
hsa04015	Rap1 signaling pathway	FGF1	AFGF|ECGF|ECGF-beta|ECGFA|ECGFB|FGF-1|FGF-alpha|FGFA|GLIO703|HBGF-1|HBGF1	fibroblast growth factor 1	FGF1	211	10	1.86317	0.0548288	0.180639
hsa04015	Rap1 signaling pathway	FGF7	HBGF-7|KGF	fibroblast growth factor 7	FGF	211	10	1.86317	0.0548288	0.180639
hsa04015	Rap1 signaling pathway	ANGPT1	AGP1|AGPT|ANG1	angiopoietin 1	ANGPT1	211	10	1.86317	0.0548288	0.180639
hsa04015	Rap1 signaling pathway	ANGPT2	AGPT2|ANG2	angiopoietin 2	ANGPT2	211	10	1.86317	0.0548288	0.180639
hsa04015	Rap1 signaling pathway	PDGFRA	CD140A|GAS9|PDGFR-2|PDGFR2|RHEPDGFRA	platelet derived growth factor receptor alpha	PDGFRA	211	10	1.86317	0.0548288	0.180639
hsa04015	Rap1 signaling pathway	FYB	ADAP|PRO0823|SLAP-130|SLAP130	FYN binding protein	FYB	211	10	1.86317	0.0548288	0.180639
hsa04015	Rap1 signaling pathway	THBS1	THBS|THBS-1|TSP|TSP-1|TSP1	thrombospondin 1	THBS1	211	10	1.86317	0.0548288	0.180639
hsa04015	Rap1 signaling pathway	PIK3CA	CLOVE|CWS5|MCAP|MCM|MCMTC|PI3K|p110-alpha	phosphatidylinositol-4,5-bisphosphate 3-kinase catalytic subunit alpha	PIK3C	211	10	1.86317	0.0548288	0.180639
hsa05142	Chagas disease (American trypanosomiasis)	FOS	AP-1|C-FOS|p55	FBJ murine osteosarcoma viral oncogene homolog	FOS	104	6	2.26805	0.0593278	0.187685
hsa05142	Chagas disease (American trypanosomiasis)	IL6	BSF-2|BSF2|CDF|HGF|HSF|IFN-beta-2|IFNB2|IL-6	interleukin 6	IL6	104	6	2.26805	0.0593278	0.187685
hsa05142	Chagas disease (American trypanosomiasis)	CXCL8	GCP-1|GCP1|IL8|LECT|LUCT|LYNAP|MDNCF|MONAP|NAF|NAP-1|NAP1	chemokine (C-X-C motif) ligand 8	IL8	104	6	2.26805	0.0593278	0.187685
hsa05142	Chagas disease (American trypanosomiasis)	IL1B	IL-1|IL1-BETA|IL1F2	interleukin 1 beta	IL1B	104	6	2.26805	0.0593278	0.187685
hsa05142	Chagas disease (American trypanosomiasis)	PIK3CA	CLOVE|CWS5|MCAP|MCM|MCMTC|PI3K|p110-alpha	phosphatidylinositol-4,5-bisphosphate 3-kinase catalytic subunit alpha	PIK3C	104	6	2.26805	0.0593278	0.187685
hsa05142	Chagas disease (American trypanosomiasis)	FAS	ALPS1A|APO-1|APT1|CD95|FAS1|FASTM|TNFRSF6	Fas cell surface death receptor	TNFRSF6	104	6	2.26805	0.0593278	0.187685
hsa04380	Osteoclast differentiation	PIK3CA	CLOVE|CWS5|MCAP|MCM|MCMTC|PI3K|p110-alpha	phosphatidylinositol-4,5-bisphosphate 3-kinase catalytic subunit alpha	PIK3C	132	7	2.08477	0.0621559	0.187685
hsa04380	Osteoclast differentiation	IL1B	IL-1|IL1-BETA|IL1F2	interleukin 1 beta	IL1B	132	7	2.08477	0.0621559	0.187685
hsa04380	Osteoclast differentiation	FOS	AP-1|C-FOS|p55	FBJ murine osteosarcoma viral oncogene homolog	FOS	132	7	2.08477	0.0621559	0.187685
hsa04380	Osteoclast differentiation	FOSB	AP-1|G0S3|GOS3|GOSB	FBJ murine osteosarcoma viral oncogene homolog B	FOSB	132	7	2.08477	0.0621559	0.187685
hsa04380	Osteoclast differentiation	JUNB	AP-1	jun B proto-oncogene	JUNB	132	7	2.08477	0.0621559	0.187685
hsa04380	Osteoclast differentiation	FCGR3B	CD16|CD16b|FCG3|FCGR3|FCR-10|FCRIII|FCRIIIb	Fc fragment of IgG receptor IIIb	FCGR3	132	7	2.08477	0.0621559	0.187685
hsa04380	Osteoclast differentiation	SOCS3	ATOD4|CIS3|Cish3|SOCS-3|SSI-3|SSI3	suppressor of cytokine signaling 3	SOCS3	132	7	2.08477	0.0621559	0.187685
hsa04620	Toll-like receptor signaling pathway	TLR3	CD283|IIAE2	toll like receptor 3	TLR3	106	6	2.22526	0.0635798	0.187685
hsa04620	Toll-like receptor signaling pathway	PIK3CA	CLOVE|CWS5|MCAP|MCM|MCMTC|PI3K|p110-alpha	phosphatidylinositol-4,5-bisphosphate 3-kinase catalytic subunit alpha	PIK3C	106	6	2.22526	0.0635798	0.187685
hsa04620	Toll-like receptor signaling pathway	FOS	AP-1|C-FOS|p55	FBJ murine osteosarcoma viral oncogene homolog	FOS	106	6	2.22526	0.0635798	0.187685
hsa04620	Toll-like receptor signaling pathway	IL1B	IL-1|IL1-BETA|IL1F2	interleukin 1 beta	IL1B	106	6	2.22526	0.0635798	0.187685
hsa04620	Toll-like receptor signaling pathway	IL6	BSF-2|BSF2|CDF|HGF|HSF|IFN-beta-2|IFNB2|IL-6	interleukin 6	IL6	106	6	2.22526	0.0635798	0.187685
hsa04620	Toll-like receptor signaling pathway	CXCL8	GCP-1|GCP1|IL8|LECT|LUCT|LYNAP|MDNCF|MONAP|NAF|NAP-1|NAP1	chemokine (C-X-C motif) ligand 8	IL8	106	6	2.22526	0.0635798	0.187685
hsa05150	Staphylococcus aureus infection	FCGR3B	CD16|CD16b|FCG3|FCGR3|FCR-10|FCRIII|FCRIIIb	Fc fragment of IgG receptor IIIb	FCGR3	56	4	2.80806	0.0635895	0.187685
hsa05150	Staphylococcus aureus infection	ICAM1	BB2|CD54|P3.58	intercellular adhesion molecule 1	ICAM1	56	4	2.80806	0.0635895	0.187685
hsa05150	Staphylococcus aureus infection	HLA-DQA1	CD|CELIAC1|DQ-A1|GSE|HLA-DQA	major histocompatibility complex, class II, DQ alpha 1	MHC2	56	4	2.80806	0.0635895	0.187685
hsa05150	Staphylococcus aureus infection	HLA-DRB4	DR-4|DR4|DRB4|HLA-DR4B	major histocompatibility complex, class II, DR beta 4	MHC2	56	4	2.80806	0.0635895	0.187685
hsa05160	Hepatitis C	DDX58	RIG-I|RIGI|RLR-1|SGMRT2	DEXD/H-box helicase 58	DDX58	133	7	2.0691	0.0640589	0.187685
hsa05160	Hepatitis C	TLR3	CD283|IIAE2	toll like receptor 3	TLR3	133	7	2.0691	0.0640589	0.187685
hsa05160	Hepatitis C	EIF2AK2	EIF2AK1|PKR|PPP1R83|PRKR	eukaryotic translation initiation factor 2 alpha kinase 2	EIF2AK2	133	7	2.0691	0.0640589	0.187685
hsa05160	Hepatitis C	CXCL8	GCP-1|GCP1|IL8|LECT|LUCT|LYNAP|MDNCF|MONAP|NAF|NAP-1|NAP1	chemokine (C-X-C motif) ligand 8	IL8	133	7	2.0691	0.0640589	0.187685
hsa05160	Hepatitis C	IFIT1	C56|G10P1|IFI-56|IFI-56K|IFI56|IFIT-1|IFNAI1|ISG56|P56|RNM561	interferon induced protein with tetratricopeptide repeats 1	IFIT1	133	7	2.0691	0.0640589	0.187685
hsa05160	Hepatitis C	SOCS3	ATOD4|CIS3|Cish3|SOCS-3|SSI-3|SSI3	suppressor of cytokine signaling 3	SOCS3	133	7	2.0691	0.0640589	0.187685
hsa05160	Hepatitis C	PIK3CA	CLOVE|CWS5|MCAP|MCM|MCMTC|PI3K|p110-alpha	phosphatidylinositol-4,5-bisphosphate 3-kinase catalytic subunit alpha	PIK3C	133	7	2.0691	0.0640589	0.187685
hsa04068	FoxO signaling pathway	PRKAA2	AMPK|AMPK2|AMPKa2|PRKAA	protein kinase, AMP-activated, alpha 2 catalytic subunit	PRKAA	134	7	2.05366	0.0659965	0.187812
hsa04068	FoxO signaling pathway	PIK3CA	CLOVE|CWS5|MCAP|MCM|MCMTC|PI3K|p110-alpha	phosphatidylinositol-4,5-bisphosphate 3-kinase catalytic subunit alpha	PIK3C	134	7	2.05366	0.0659965	0.187812
hsa04068	FoxO signaling pathway	SGK1	SGK	serum/glucocorticoid regulated kinase 1	SGK1	134	7	2.05366	0.0659965	0.187812
hsa04068	FoxO signaling pathway	IL6	BSF-2|BSF2|CDF|HGF|HSF|IFN-beta-2|IFNB2|IL-6	interleukin 6	IL6	134	7	2.05366	0.0659965	0.187812
hsa04068	FoxO signaling pathway	PLK2	SNK|hPlk2|hSNK	polo like kinase 2	PLK2	134	7	2.05366	0.0659965	0.187812
hsa04068	FoxO signaling pathway	GADD45B	GADD45BETA|MYD118	growth arrest and DNA damage inducible beta	GADD45	134	7	2.05366	0.0659965	0.187812
hsa04068	FoxO signaling pathway	FBXO32	Fbx32|MAFbx	F-box protein 32	FBXO25_32	134	7	2.05366	0.0659965	0.187812
hsa00604	Glycosphingolipid biosynthesis - ganglio series	SLC33A1	ACATN|AT-1|AT1|CCHLND|SPG42	solute carrier family 33 (acetyl-CoA transporter), member 1	ACATN	15	2	5.24171	0.0662309	0.187812
hsa00604	Glycosphingolipid biosynthesis - ganglio series	ST6GALNAC5	SIAT7-E|SIAT7E|ST6GalNAcV	ST6 (alpha-N-acetyl-neuraminyl-2,3-beta-galactosyl-1,3)-N-acetylgalactosaminide alpha-2,6-sialyltransferase 5	SIAT7E	15	2	5.24171	0.0662309	0.187812
hsa05020	Prion diseases	EGR1	AT225|G0S30|KROX-24|NGFI-A|TIS8|ZIF-268|ZNF225	early growth response 1	EGR1	35	3	3.36967	0.0690956	0.193858
hsa05020	Prion diseases	IL1B	IL-1|IL1-BETA|IL1F2	interleukin 1 beta	IL1B	35	3	3.36967	0.0690956	0.193858
hsa05020	Prion diseases	IL6	BSF-2|BSF2|CDF|HGF|HSF|IFN-beta-2|IFNB2|IL-6	interleukin 6	IL6	35	3	3.36967	0.0690956	0.193858
hsa00073	Cutin, suberine and wax biosynthesis	FAR1	MLSTD2|PFCRD|SDR10E1	fatty acyl-CoA reductase 1	FAR	2	1	19.6564	0.0729628	0.201789
hsa05416	Viral myocarditis	HLA-DQA1	CD|CELIAC1|DQ-A1|GSE|HLA-DQA	major histocompatibility complex, class II, DQ alpha 1	MHC2	59	4	2.66528	0.0733029	0.201789
hsa05416	Viral myocarditis	HLA-DRB4	DR-4|DR4|DRB4|HLA-DR4B	major histocompatibility complex, class II, DR beta 4	MHC2	59	4	2.66528	0.0733029	0.201789
hsa05416	Viral myocarditis	HLA-C	D6S204|HLA-JY3|HLAC|HLC-C|PSORS1	major histocompatibility complex, class I, C	MHC1	59	4	2.66528	0.0733029	0.201789
hsa05416	Viral myocarditis	ICAM1	BB2|CD54|P3.58	intercellular adhesion molecule 1	ICAM1	59	4	2.66528	0.0733029	0.201789
hsa04210	Apoptosis	FAS	ALPS1A|APO-1|APT1|CD95|FAS1|FASTM|TNFRSF6	Fas cell surface death receptor	TNFRSF6	140	7	1.96564	0.0783503	0.201789
hsa04210	Apoptosis	BIRC2	API1|HIAP2|Hiap-2|MIHB|RNF48|c-IAP1|cIAP1	baculoviral IAP repeat containing 2	BIRC2_3	140	7	1.96564	0.0783503	0.201789
hsa04210	Apoptosis	FOS	AP-1|C-FOS|p55	FBJ murine osteosarcoma viral oncogene homolog	FOS	140	7	1.96564	0.0783503	0.201789
hsa04210	Apoptosis	GADD45B	GADD45BETA|MYD118	growth arrest and DNA damage inducible beta	GADD45	140	7	1.96564	0.0783503	0.201789
hsa04210	Apoptosis	BCL2A1	ACC-1|ACC-2|ACC1|ACC2|BCL2L5|BFL1|GRS|HBPA1	BCL2 related protein A1	BCL2A1	140	7	1.96564	0.0783503	0.201789
hsa04210	Apoptosis	PIK3CA	CLOVE|CWS5|MCAP|MCM|MCMTC|PI3K|p110-alpha	phosphatidylinositol-4,5-bisphosphate 3-kinase catalytic subunit alpha	PIK3C	140	7	1.96564	0.0783503	0.201789
hsa04210	Apoptosis	DDIT3	CEBPZ|CHOP|CHOP-10|CHOP10|GADD153	DNA damage inducible transcript 3	DDIT3	140	7	1.96564	0.0783503	0.201789
hsa04014	Ras signaling pathway	FGF1	AFGF|ECGF|ECGF-beta|ECGFA|ECGFB|FGF-1|FGF-alpha|FGFA|GLIO703|HBGF-1|HBGF1	fibroblast growth factor 1	FGF1	227	10	1.73184	0.0786379	0.201789
hsa04014	Ras signaling pathway	FGF7	HBGF-7|KGF	fibroblast growth factor 7	FGF	227	10	1.73184	0.0786379	0.201789
hsa04014	Ras signaling pathway	ANGPT1	AGP1|AGPT|ANG1	angiopoietin 1	ANGPT1	227	10	1.73184	0.0786379	0.201789
hsa04014	Ras signaling pathway	ANGPT2	AGPT2|ANG2	angiopoietin 2	ANGPT2	227	10	1.73184	0.0786379	0.201789
hsa04014	Ras signaling pathway	PDGFRA	CD140A|GAS9|PDGFR-2|PDGFR2|RHEPDGFRA	platelet derived growth factor receptor alpha	PDGFRA	227	10	1.73184	0.0786379	0.201789
hsa04014	Ras signaling pathway	SHC4	RaLP|SHCD	SHC (Src homology 2 domain containing) family member 4	SHC4	227	10	1.73184	0.0786379	0.201789
hsa04014	Ras signaling pathway	RASA2	GAP1M	RAS p21 protein activator 2	RASA2	227	10	1.73184	0.0786379	0.201789
hsa04014	Ras signaling pathway	PIK3CA	CLOVE|CWS5|MCAP|MCM|MCMTC|PI3K|p110-alpha	phosphatidylinositol-4,5-bisphosphate 3-kinase catalytic subunit alpha	PIK3C	227	10	1.73184	0.0786379	0.201789
hsa04014	Ras signaling pathway	RAPGEF5	GFR|MR-GEF|REPAC	Rap guanine nucleotide exchange factor 5	RAPGEF5	227	10	1.73184	0.0786379	0.201789
hsa04014	Ras signaling pathway	REL	C-Rel	v-rel avian reticuloendotheliosis viral oncogene homolog	REL	227	10	1.73184	0.0786379	0.201789
hsa05166	HTLV-I infection	ICAM1	BB2|CD54|P3.58	intercellular adhesion molecule 1	ICAM1	258	11	1.67613	0.080309	0.201789
hsa05166	HTLV-I infection	HLA-C	D6S204|HLA-JY3|HLAC|HLC-C|PSORS1	major histocompatibility complex, class I, C	MHC1	258	11	1.67613	0.080309	0.201789
hsa05166	HTLV-I infection	PDGFRA	CD140A|GAS9|PDGFR-2|PDGFR2|RHEPDGFRA	platelet derived growth factor receptor alpha	PDGFRA	258	11	1.67613	0.080309	0.201789
hsa05166	HTLV-I infection	PIK3CA	CLOVE|CWS5|MCAP|MCM|MCMTC|PI3K|p110-alpha	phosphatidylinositol-4,5-bisphosphate 3-kinase catalytic subunit alpha	PIK3C	258	11	1.67613	0.080309	0.201789
hsa05166	HTLV-I infection	IL6	BSF-2|BSF2|CDF|HGF|HSF|IFN-beta-2|IFNB2|IL-6	interleukin 6	IL6	258	11	1.67613	0.080309	0.201789
hsa05166	HTLV-I infection	ZFP36	G0S24|GOS24|NUP475|RNF162A|TIS11|TTP|zfp-36	ZFP36 ring finger protein	TTP	258	11	1.67613	0.080309	0.201789
hsa05166	HTLV-I infection	HLA-DQA1	CD|CELIAC1|DQ-A1|GSE|HLA-DQA	major histocompatibility complex, class II, DQ alpha 1	MHC2	258	11	1.67613	0.080309	0.201789
hsa05166	HTLV-I infection	HLA-DRB4	DR-4|DR4|DRB4|HLA-DR4B	major histocompatibility complex, class II, DR beta 4	MHC2	258	11	1.67613	0.080309	0.201789
hsa05166	HTLV-I infection	FOS	AP-1|C-FOS|p55	FBJ murine osteosarcoma viral oncogene homolog	FOS	258	11	1.67613	0.080309	0.201789
hsa05166	HTLV-I infection	EGR1	AT225|G0S30|KROX-24|NGFI-A|TIS8|ZIF-268|ZNF225	early growth response 1	EGR1	258	11	1.67613	0.080309	0.201789
hsa05166	HTLV-I infection	EGR2	AT591|CMT1D|CMT4E|KROX20	early growth response 2	EGR2	258	11	1.67613	0.080309	0.201789
hsa04640	Hematopoietic cell lineage	IL6	BSF-2|BSF2|CDF|HGF|HSF|IFN-beta-2|IFNB2|IL-6	interleukin 6	IL6	88	5	2.23368	0.0847981	0.206682
hsa04640	Hematopoietic cell lineage	IL1B	IL-1|IL1-BETA|IL1F2	interleukin 1 beta	IL1B	88	5	2.23368	0.0847981	0.206682
hsa04640	Hematopoietic cell lineage	TFRC	CD71|IMD46|T9|TFR|TFR1|TR|TRFR|p90	transferrin receptor	TFRC	88	5	2.23368	0.0847981	0.206682
hsa04640	Hematopoietic cell lineage	ITGA1	CD49a|VLA1	integrin subunit alpha 1	ITGA1	88	5	2.23368	0.0847981	0.206682
hsa04640	Hematopoietic cell lineage	HLA-DRB4	DR-4|DR4|DRB4|HLA-DR4B	major histocompatibility complex, class II, DR beta 4	MHC2	88	5	2.23368	0.0847981	0.206682
hsa03013	RNA transport	RANBP2	ADANE|ANE1|IIAE3|NUP358|TRP1|TRP2	RAN binding protein 2	RANBP2	172	8	1.8285	0.0856404	0.206682
hsa03013	RNA transport	RGPD1	RGP1|RGPD2|RanBP2L2	RANBP2-like and GRIP domain containing 1	RANBP2	172	8	1.8285	0.0856404	0.206682
hsa03013	RNA transport	RGPD8	RANBP2L1|RGP8|RanBP2alpha	RANBP2-like and GRIP domain containing 8	RANBP2	172	8	1.8285	0.0856404	0.206682
hsa03013	RNA transport	SMN2	BCD541|C-BCD541|GEMIN1|SMNC|TDRD16B	survival of motor neuron 2, centromeric	SMN	172	8	1.8285	0.0856404	0.206682
hsa03013	RNA transport	EIF1AX	EIF1A|EIF1AP1|EIF4C|eIF-1A|eIF-4C	eukaryotic translation initiation factor 1A, X-linked	EIF1A	172	8	1.8285	0.0856404	0.206682
hsa03013	RNA transport	EIF2S3	EIF2|EIF2G|EIF2gamma|eIF-2gA	eukaryotic translation initiation factor 2 subunit gamma	EIF2S3	172	8	1.8285	0.0856404	0.206682
hsa03013	RNA transport	THOC1	HPR1|P84|P84N5	THO complex 1	THOC1	172	8	1.8285	0.0856404	0.206682
hsa03013	RNA transport	SMN1	BCD541|GEMIN1|SMA|SMA1|SMA2|SMA3|SMA4|SMA@|SMN|SMNT|T-BCD541|TDRD16A	survival of motor neuron 1, telomeric	SMN	172	8	1.8285	0.0856404	0.206682
hsa04960	Aldosterone-regulated sodium reabsorption	SGK1	SGK	serum/glucocorticoid regulated kinase 1	SGK1	39	3	3.02407	0.0874458	0.209132
hsa04960	Aldosterone-regulated sodium reabsorption	ATP1B3	ATPB-3|CD298	ATPase, Na+/K+ transporting, beta 3 polypeptide	ATP1B	39	3	3.02407	0.0874458	0.209132
hsa04960	Aldosterone-regulated sodium reabsorption	PIK3CA	CLOVE|CWS5|MCAP|MCM|MCMTC|PI3K|p110-alpha	phosphatidylinositol-4,5-bisphosphate 3-kinase catalytic subunit alpha	PIK3C	39	3	3.02407	0.0874458	0.209132
hsa00770	Pantothenate and CoA biosynthesis	PANK2	C20orf48|HARP|HSS|NBIA1|PKAN	pantothenate kinase 2	coaW	18	2	4.36809	0.0881057	0.209449
hsa00770	Pantothenate and CoA biosynthesis	VNN2	FOAP-4|GPI-80	vanin 2	VNN	18	2	4.36809	0.0881057	0.209449
hsa05414	Dilated cardiomyopathy (DCM)	ITGA1	CD49a|VLA1	integrin subunit alpha 1	ITGA1	90	5	2.18405	0.0908417	0.212768
hsa05414	Dilated cardiomyopathy (DCM)	ITGB8	-	integrin subunit beta 8	ITGB8	90	5	2.18405	0.0908417	0.212768
hsa05414	Dilated cardiomyopathy (DCM)	TTN	CMD1G|CMH9|CMPD4|EOMFC|HMERF|LGMD2J|MYLK5|TMD	titin	TTN	90	5	2.18405	0.0908417	0.212768
hsa05414	Dilated cardiomyopathy (DCM)	CACNB4	CAB4|CACNLB4|EA5|EIG9|EJM|EJM4|EJM6	calcium channel, voltage-dependent, beta 4 subunit	CACNB4	90	5	2.18405	0.0908417	0.212768
hsa05414	Dilated cardiomyopathy (DCM)	CACNA2D1	CACNA2|CACNL2A|CCHL2A|LINC01112|lncRNA-N3	calcium channel, voltage-dependent, alpha 2/delta subunit 1	CACNA2D1	90	5	2.18405	0.0908417	0.212768
hsa05321	Inflammatiory bowel disease (IBD)	HLA-DQA1	CD|CELIAC1|DQ-A1|GSE|HLA-DQA	major histocompatibility complex, class II, DQ alpha 1	MHC2	65	4	2.41925	0.0948047	0.219461
hsa05321	Inflammatiory bowel disease (IBD)	HLA-DRB4	DR-4|DR4|DRB4|HLA-DR4B	major histocompatibility complex, class II, DR beta 4	MHC2	65	4	2.41925	0.0948047	0.219461
hsa05321	Inflammatiory bowel disease (IBD)	IL6	BSF-2|BSF2|CDF|HGF|HSF|IFN-beta-2|IFNB2|IL-6	interleukin 6	IL6	65	4	2.41925	0.0948047	0.219461
hsa05321	Inflammatiory bowel disease (IBD)	IL1B	IL-1|IL1-BETA|IL1F2	interleukin 1 beta	IL1B	65	4	2.41925	0.0948047	0.219461
hsa04115	p53 signaling pathway	GADD45B	GADD45BETA|MYD118	growth arrest and DNA damage inducible beta	GADD45	69	4	2.27901	0.110589	0.252756
hsa04115	p53 signaling pathway	FAS	ALPS1A|APO-1|APT1|CD95|FAS1|FASTM|TNFRSF6	Fas cell surface death receptor	TNFRSF6	69	4	2.27901	0.110589	0.252756
hsa04115	p53 signaling pathway	THBS1	THBS|THBS-1|TSP|TSP-1|TSP1	thrombospondin 1	THBS1	69	4	2.27901	0.110589	0.252756
hsa04115	p53 signaling pathway	SESN3	SEST3	sestrin 3	SESN	69	4	2.27901	0.110589	0.252756
hsa04151	PI3K-Akt signaling pathway	FGF1	AFGF|ECGF|ECGF-beta|ECGFA|ECGFB|FGF-1|FGF-alpha|FGFA|GLIO703|HBGF-1|HBGF1	fibroblast growth factor 1	FGF1	341	13	1.49873	0.1146	0.252756
hsa04151	PI3K-Akt signaling pathway	FGF7	HBGF-7|KGF	fibroblast growth factor 7	FGF	341	13	1.49873	0.1146	0.252756
hsa04151	PI3K-Akt signaling pathway	ANGPT1	AGP1|AGPT|ANG1	angiopoietin 1	ANGPT1	341	13	1.49873	0.1146	0.252756
hsa04151	PI3K-Akt signaling pathway	ANGPT2	AGPT2|ANG2	angiopoietin 2	ANGPT2	341	13	1.49873	0.1146	0.252756
hsa04151	PI3K-Akt signaling pathway	PDGFRA	CD140A|GAS9|PDGFR-2|PDGFR2|RHEPDGFRA	platelet derived growth factor receptor alpha	PDGFRA	341	13	1.49873	0.1146	0.252756
hsa04151	PI3K-Akt signaling pathway	IL6	BSF-2|BSF2|CDF|HGF|HSF|IFN-beta-2|IFNB2|IL-6	interleukin 6	IL6	341	13	1.49873	0.1146	0.252756
hsa04151	PI3K-Akt signaling pathway	THBS1	THBS|THBS-1|TSP|TSP-1|TSP1	thrombospondin 1	THBS1	341	13	1.49873	0.1146	0.252756
hsa04151	PI3K-Akt signaling pathway	ITGA1	CD49a|VLA1	integrin subunit alpha 1	ITGA1	341	13	1.49873	0.1146	0.252756
hsa04151	PI3K-Akt signaling pathway	ITGB8	-	integrin subunit beta 8	ITGB8	341	13	1.49873	0.1146	0.252756
hsa04151	PI3K-Akt signaling pathway	PRKAA2	AMPK|AMPK2|AMPKa2|PRKAA	protein kinase, AMP-activated, alpha 2 catalytic subunit	PRKAA	341	13	1.49873	0.1146	0.252756
hsa04151	PI3K-Akt signaling pathway	SGK1	SGK	serum/glucocorticoid regulated kinase 1	SGK1	341	13	1.49873	0.1146	0.252756
hsa04151	PI3K-Akt signaling pathway	NR4A1	GFRP1|HMR|N10|NAK-1|NGFIB|NP10|NUR77|TR3	nuclear receptor subfamily 4 group A member 1	NR4A1	341	13	1.49873	0.1146	0.252756
hsa04151	PI3K-Akt signaling pathway	PIK3CA	CLOVE|CWS5|MCAP|MCM|MCMTC|PI3K|p110-alpha	phosphatidylinositol-4,5-bisphosphate 3-kinase catalytic subunit alpha	PIK3C	341	13	1.49873	0.1146	0.252756
hsa05218	Melanoma	FGF1	AFGF|ECGF|ECGF-beta|ECGFA|ECGFB|FGF-1|FGF-alpha|FGFA|GLIO703|HBGF-1|HBGF1	fibroblast growth factor 1	FGF1	71	4	2.21481	0.118888	0.259332
hsa05218	Melanoma	FGF7	HBGF-7|KGF	fibroblast growth factor 7	FGF	71	4	2.21481	0.118888	0.259332
hsa05218	Melanoma	PDGFRA	CD140A|GAS9|PDGFR-2|PDGFR2|RHEPDGFRA	platelet derived growth factor receptor alpha	PDGFRA	71	4	2.21481	0.118888	0.259332
hsa05218	Melanoma	PIK3CA	CLOVE|CWS5|MCAP|MCM|MCMTC|PI3K|p110-alpha	phosphatidylinositol-4,5-bisphosphate 3-kinase catalytic subunit alpha	PIK3C	71	4	2.21481	0.118888	0.259332
hsa04921	Oxytocin signaling pathway	PTGS2	COX-2|COX2|GRIPGHS|PGG/HS|PGHS-2|PHS-2|hCox-2	prostaglandin-endoperoxide synthase 2 (prostaglandin G/H synthase and cyclooxygenase)	PTGS2	158	7	1.74171	0.122751	0.260716
hsa04921	Oxytocin signaling pathway	FOS	AP-1|C-FOS|p55	FBJ murine osteosarcoma viral oncogene homolog	FOS	158	7	1.74171	0.122751	0.260716
hsa04921	Oxytocin signaling pathway	CACNB4	CAB4|CACNLB4|EA5|EIG9|EJM|EJM4|EJM6	calcium channel, voltage-dependent, beta 4 subunit	CACNB4	158	7	1.74171	0.122751	0.260716
hsa04921	Oxytocin signaling pathway	RGS2	G0S8	regulator of G-protein signaling 2	RGS2	158	7	1.74171	0.122751	0.260716
hsa04921	Oxytocin signaling pathway	PRKAA2	AMPK|AMPK2|AMPKa2|PRKAA	protein kinase, AMP-activated, alpha 2 catalytic subunit	PRKAA	158	7	1.74171	0.122751	0.260716
hsa04921	Oxytocin signaling pathway	PIK3CA	CLOVE|CWS5|MCAP|MCM|MCMTC|PI3K|p110-alpha	phosphatidylinositol-4,5-bisphosphate 3-kinase catalytic subunit alpha	PIK3C	158	7	1.74171	0.122751	0.260716
hsa04921	Oxytocin signaling pathway	CACNA2D1	CACNA2|CACNL2A|CCHL2A|LINC01112|lncRNA-N3	calcium channel, voltage-dependent, alpha 2/delta subunit 1	CACNA2D1	158	7	1.74171	0.122751	0.260716
hsa04917	Prolactin signaling pathway	SHC4	RaLP|SHCD	SHC (Src homology 2 domain containing) family member 4	SHC4	72	4	2.18405	0.123134	0.260716
hsa04917	Prolactin signaling pathway	PIK3CA	CLOVE|CWS5|MCAP|MCM|MCMTC|PI3K|p110-alpha	phosphatidylinositol-4,5-bisphosphate 3-kinase catalytic subunit alpha	PIK3C	72	4	2.18405	0.123134	0.260716
hsa04917	Prolactin signaling pathway	FOS	AP-1|C-FOS|p55	FBJ murine osteosarcoma viral oncogene homolog	FOS	72	4	2.18405	0.123134	0.260716
hsa04917	Prolactin signaling pathway	SOCS3	ATOD4|CIS3|Cish3|SOCS-3|SSI-3|SSI3	suppressor of cytokine signaling 3	SOCS3	72	4	2.18405	0.123134	0.260716
hsa05412	Arrhythmogenic right ventricular cardiomyopathy (ARVC)	ITGA1	CD49a|VLA1	integrin subunit alpha 1	ITGA1	74	4	2.12502	0.131815	0.276151
hsa05412	Arrhythmogenic right ventricular cardiomyopathy (ARVC)	ITGB8	-	integrin subunit beta 8	ITGB8	74	4	2.12502	0.131815	0.276151
hsa05412	Arrhythmogenic right ventricular cardiomyopathy (ARVC)	CACNB4	CAB4|CACNLB4|EA5|EIG9|EJM|EJM4|EJM6	calcium channel, voltage-dependent, beta 4 subunit	CACNB4	74	4	2.12502	0.131815	0.276151
hsa05412	Arrhythmogenic right ventricular cardiomyopathy (ARVC)	CACNA2D1	CACNA2|CACNL2A|CCHL2A|LINC01112|lncRNA-N3	calcium channel, voltage-dependent, alpha 2/delta subunit 1	CACNA2D1	74	4	2.12502	0.131815	0.276151
hsa04066	HIF-1 signaling pathway	IL6	BSF-2|BSF2|CDF|HGF|HSF|IFN-beta-2|IFNB2|IL-6	interleukin 6	IL6	103	5	1.90839	0.135138	0.278813
hsa04066	HIF-1 signaling pathway	PIK3CA	CLOVE|CWS5|MCAP|MCM|MCMTC|PI3K|p110-alpha	phosphatidylinositol-4,5-bisphosphate 3-kinase catalytic subunit alpha	PIK3C	103	5	1.90839	0.135138	0.278813
hsa04066	HIF-1 signaling pathway	TFRC	CD71|IMD46|T9|TFR|TFR1|TR|TRFR|p90	transferrin receptor	TFRC	103	5	1.90839	0.135138	0.278813
hsa04066	HIF-1 signaling pathway	ANGPT1	AGP1|AGPT|ANG1	angiopoietin 1	ANGPT1	103	5	1.90839	0.135138	0.278813
hsa04066	HIF-1 signaling pathway	ANGPT2	AGPT2|ANG2	angiopoietin 2	ANGPT2	103	5	1.90839	0.135138	0.278813
hsa05133	Pertussis	IL1B	IL-1|IL1-BETA|IL1F2	interleukin 1 beta	IL1B	75	4	2.09669	0.136246	0.278813
hsa05133	Pertussis	FOS	AP-1|C-FOS|p55	FBJ murine osteosarcoma viral oncogene homolog	FOS	75	4	2.09669	0.136246	0.278813
hsa05133	Pertussis	IL6	BSF-2|BSF2|CDF|HGF|HSF|IFN-beta-2|IFNB2|IL-6	interleukin 6	IL6	75	4	2.09669	0.136246	0.278813
hsa05133	Pertussis	CXCL8	GCP-1|GCP1|IL8|LECT|LUCT|LYNAP|MDNCF|MONAP|NAF|NAP-1|NAP1	chemokine (C-X-C motif) ligand 8	IL8	75	4	2.09669	0.136246	0.278813
hsa00510	N-Glycan biosynthesis	ALG13	CDG1S|CXorf45|EIEE36|GLT28D1|MDS031|TDRD13|YGL047W	ALG13, UDP-N-acetylglucosaminyltransferase subunit	ALG13	49	3	2.40691	0.140711	0.285741
hsa00510	N-Glycan biosynthesis	TUSC3	D8S1992|M33|MRT22|MRT7|N33|OST3A	tumor suppressor candidate 3	OST3	49	3	2.40691	0.140711	0.285741
hsa00510	N-Glycan biosynthesis	MGAT4C	GNTIVH|HGNT-IV-H	MGAT4 family member C	MGAT4C	49	3	2.40691	0.140711	0.285741
hsa03018	RNA degradation	DIS3	2810028N01Rik|EXOSC11|KIAA1008|RRP44|dis3p	DIS3 homolog, exosome endoribonuclease and 3'-5' exoribonuclease	DIS3	77	4	2.04223	0.145284	0.287879
hsa03018	RNA degradation	SKIV2L2	Dob1|KIAA0052|Mtr4|fSAP118	Ski2 like RNA helicase 2	MTR4	77	4	2.04223	0.145284	0.287879
hsa03018	RNA degradation	TOB1	APRO6|PIG49|TOB|TROB|TROB1	transducer of ERBB2, 1	TOB	77	4	2.04223	0.145284	0.287879
hsa03018	RNA degradation	BTG2	PC3|TIS21	BTG family member 2	TOB	77	4	2.04223	0.145284	0.287879
hsa04612	Antigen processing and presentation	HSPA1B	HSP70-1B|HSP70-2|HSP70.2	heat shock protein family A (Hsp70) member 1B	HSPA1_8	77	4	2.04223	0.145284	0.287879
hsa04612	Antigen processing and presentation	HLA-C	D6S204|HLA-JY3|HLAC|HLC-C|PSORS1	major histocompatibility complex, class I, C	MHC1	77	4	2.04223	0.145284	0.287879
hsa04612	Antigen processing and presentation	HLA-DQA1	CD|CELIAC1|DQ-A1|GSE|HLA-DQA	major histocompatibility complex, class II, DQ alpha 1	MHC2	77	4	2.04223	0.145284	0.287879
hsa04612	Antigen processing and presentation	HLA-DRB4	DR-4|DR4|DRB4|HLA-DR4B	major histocompatibility complex, class II, DR beta 4	MHC2	77	4	2.04223	0.145284	0.287879
hsa00563	Glycosylphosphatidylinositol(GPI)-anchor biosynthesis	PIGK	GPI8	phosphatidylinositol glycan anchor biosynthesis class		25	2	3.14503	0.14539	0.287879
hsa00563	Glycosylphosphatidylinositol(GPI)-anchor biosynthesis	PGAP1	Bst1|ISPD3024|MRT42|SPG67	post-GPI attachment to proteins 1	PGAP1	25	2	3.14503	0.14539	0.287879
hsa04650	Natural killer cell mediated cytotoxicity	HLA-C	D6S204|HLA-JY3|HLAC|HLC-C|PSORS1	major histocompatibility complex, class I, C	MHC1	138	6	1.70925	0.154189	0.300801
hsa04650	Natural killer cell mediated cytotoxicity	ICAM1	BB2|CD54|P3.58	intercellular adhesion molecule 1	ICAM1	138	6	1.70925	0.154189	0.300801
hsa04650	Natural killer cell mediated cytotoxicity	FCGR3B	CD16|CD16b|FCG3|FCGR3|FCR-10|FCRIII|FCRIIIb	Fc fragment of IgG receptor IIIb	FCGR3	138	6	1.70925	0.154189	0.300801
hsa04650	Natural killer cell mediated cytotoxicity	PIK3CA	CLOVE|CWS5|MCAP|MCM|MCMTC|PI3K|p110-alpha	phosphatidylinositol-4,5-bisphosphate 3-kinase catalytic subunit alpha	PIK3C	138	6	1.70925	0.154189	0.300801
hsa04650	Natural killer cell mediated cytotoxicity	SHC4	RaLP|SHCD	SHC (Src homology 2 domain containing) family member 4	SHC4	138	6	1.70925	0.154189	0.300801
hsa04650	Natural killer cell mediated cytotoxicity	FAS	ALPS1A|APO-1|APT1|CD95|FAS1|FASTM|TNFRSF6	Fas cell surface death receptor	TNFRSF6	138	6	1.70925	0.154189	0.300801
hsa04510	Focal adhesion	THBS1	THBS|THBS-1|TSP|TSP-1|TSP1	thrombospondin 1	THBS1	202	8	1.55694	0.159691	0.305529
hsa04510	Focal adhesion	ITGA1	CD49a|VLA1	integrin subunit alpha 1	ITGA1	202	8	1.55694	0.159691	0.305529
hsa04510	Focal adhesion	ITGB8	-	integrin subunit beta 8	ITGB8	202	8	1.55694	0.159691	0.305529
hsa04510	Focal adhesion	PDGFRA	CD140A|GAS9|PDGFR-2|PDGFR2|RHEPDGFRA	platelet derived growth factor receptor alpha	PDGFRA	202	8	1.55694	0.159691	0.305529
hsa04510	Focal adhesion	ARHGAP5	GFI2|RhoGAP5|p190-B|p190BRhoGAP	Rho GTPase activating protein 5	ARHGAP5	202	8	1.55694	0.159691	0.305529
hsa04510	Focal adhesion	PIK3CA	CLOVE|CWS5|MCAP|MCM|MCMTC|PI3K|p110-alpha	phosphatidylinositol-4,5-bisphosphate 3-kinase catalytic subunit alpha	PIK3C	202	8	1.55694	0.159691	0.305529
hsa04510	Focal adhesion	SHC4	RaLP|SHCD	SHC (Src homology 2 domain containing) family member 4	SHC4	202	8	1.55694	0.159691	0.305529
hsa04510	Focal adhesion	BIRC2	API1|HIAP2|Hiap-2|MIHB|RNF48|c-IAP1|cIAP1	baculoviral IAP repeat containing 2	BIRC2_3	202	8	1.55694	0.159691	0.305529
hsa05203	Viral carcinogenesis	PIK3CA	CLOVE|CWS5|MCAP|MCM|MCMTC|PI3K|p110-alpha	phosphatidylinositol-4,5-bisphosphate 3-kinase catalytic subunit alpha	PIK3C	205	8	1.53416	0.168361	0.316026
hsa05203	Viral carcinogenesis	REL	C-Rel	v-rel avian reticuloendotheliosis viral oncogene homolog	REL	205	8	1.53416	0.168361	0.316026
hsa05203	Viral carcinogenesis	EGR2	AT591|CMT1D|CMT4E|KROX20	early growth response 2	EGR2	205	8	1.53416	0.168361	0.316026
hsa05203	Viral carcinogenesis	EGR3	EGR-3|PILOT	early growth response 3	EGR3	205	8	1.53416	0.168361	0.316026
hsa05203	Viral carcinogenesis	SP100	lysp100b	SP100 nuclear antigen	SP100	205	8	1.53416	0.168361	0.316026
hsa05203	Viral carcinogenesis	EIF2AK2	EIF2AK1|PKR|PPP1R83|PRKR	eukaryotic translation initiation factor 2 alpha kinase 2	EIF2AK2	205	8	1.53416	0.168361	0.316026
hsa05203	Viral carcinogenesis	RASA2	GAP1M	RAS p21 protein activator 2	RASA2	205	8	1.53416	0.168361	0.316026
hsa05203	Viral carcinogenesis	HLA-C	D6S204|HLA-JY3|HLAC|HLC-C|PSORS1	major histocompatibility complex, class I, C	MHC1	205	8	1.53416	0.168361	0.316026
hsa04350	TGF-beta signaling pathway	THBS1	THBS|THBS-1|TSP|TSP-1|TSP1	thrombospondin 1	THBS1	84	4	1.87204	0.178595	0.331028
hsa04350	TGF-beta signaling pathway	ZFYVE16	PPP1R69	zinc finger, FYVE domain containing 16	MADHIP	84	4	1.87204	0.178595	0.331028
hsa04350	TGF-beta signaling pathway	ID3	HEIR-1|bHLHb25	inhibitor of DNA binding 3, dominant negative helix-loop-helix protein	ID3	84	4	1.87204	0.178595	0.331028
hsa04350	TGF-beta signaling pathway	ID4	IDB4|bHLHb27	inhibitor of DNA binding 4, dominant negative helix-loop-helix protein	ID4	84	4	1.87204	0.178595	0.331028
hsa00030	Pentose phosphate pathway	RPE	RPE2-1	ribulose-5-phosphate-3-epimerase	rpe	29	2	2.71123	0.180739	0.331028
hsa00030	Pentose phosphate pathway	PGM2	MSTP006	phosphoglucomutase 2	PGM2	29	2	2.71123	0.180739	0.331028
hsa00760	Nicotinate and nicotinamide metabolism	NMRK1	C9orf95|NRK1|bA235O14.2	nicotinamide riboside kinase 1	NRK1_2	29	2	2.71123	0.180739	0.331028
hsa00760	Nicotinate and nicotinamide metabolism	NAMPT	1110035O14Rik|PBEF|PBEF1|VF|VISFATIN	nicotinamide phosphoribosyltransferase	NAMPT	29	2	2.71123	0.180739	0.331028
hsa04923	Regulation of lipolysis in adipocyte	PIK3CA	CLOVE|CWS5|MCAP|MCM|MCMTC|PI3K|p110-alpha	phosphatidylinositol-4,5-bisphosphate 3-kinase catalytic subunit alpha	PIK3C	56	3	2.10605	0.182914	0.331028
hsa04923	Regulation of lipolysis in adipocyte	PTGS2	COX-2|COX2|GRIPGHS|PGG/HS|PGHS-2|PHS-2|hCox-2	prostaglandin-endoperoxide synthase 2 (prostaglandin G/H synthase and cyclooxygenase)	PTGS2	56	3	2.10605	0.182914	0.331028
hsa04923	Regulation of lipolysis in adipocyte	PTGER3	EP3|EP3-I|EP3-II|EP3-III|EP3-IV|EP3-VI|EP3e|PGE2-R	prostaglandin E receptor 3	PTGER3	56	3	2.10605	0.182914	0.331028
hsa05152	Tuberculosis	HLA-DQA1	CD|CELIAC1|DQ-A1|GSE|HLA-DQA	major histocompatibility complex, class II, DQ alpha 1	MHC2	178	7	1.54601	0.183858	0.331028
hsa05152	Tuberculosis	HLA-DRB4	DR-4|DR4|DRB4|HLA-DR4B	major histocompatibility complex, class II, DR beta 4	MHC2	178	7	1.54601	0.183858	0.331028
hsa05152	Tuberculosis	CLEC7A	BGR|CANDF4|CD369|CLECSF12|DECTIN1	C-type lectin domain family 7 member A	CLEC7A	178	7	1.54601	0.183858	0.331028
hsa05152	Tuberculosis	IL6	BSF-2|BSF2|CDF|HGF|HSF|IFN-beta-2|IFNB2|IL-6	interleukin 6	IL6	178	7	1.54601	0.183858	0.331028
hsa05152	Tuberculosis	IL1B	IL-1|IL1-BETA|IL1F2	interleukin 1 beta	IL1B	178	7	1.54601	0.183858	0.331028
hsa05152	Tuberculosis	PLA2R1	CLEC13C|PLA2-R|PLA2G1R|PLA2IR|PLA2R	phospholipase A2 receptor 1	MRC	178	7	1.54601	0.183858	0.331028
hsa05152	Tuberculosis	FCGR3B	CD16|CD16b|FCG3|FCGR3|FCR-10|FCRIII|FCRIIIb	Fc fragment of IgG receptor IIIb	FCGR3	178	7	1.54601	0.183858	0.331028
hsa04810	Regulation of actin cytoskeleton	FGF1	AFGF|ECGF|ECGF-beta|ECGFA|ECGFB|FGF-1|FGF-alpha|FGFA|GLIO703|HBGF-1|HBGF1	fibroblast growth factor 1	FGF1	214	8	1.46964	0.19557	0.342067
hsa04810	Regulation of actin cytoskeleton	FGF7	HBGF-7|KGF	fibroblast growth factor 7	FGF	214	8	1.46964	0.19557	0.342067
hsa04810	Regulation of actin cytoskeleton	PDGFRA	CD140A|GAS9|PDGFR-2|PDGFR2|RHEPDGFRA	platelet derived growth factor receptor alpha	PDGFRA	214	8	1.46964	0.19557	0.342067
hsa04810	Regulation of actin cytoskeleton	ITGA1	CD49a|VLA1	integrin subunit alpha 1	ITGA1	214	8	1.46964	0.19557	0.342067
hsa04810	Regulation of actin cytoskeleton	ITGB8	-	integrin subunit beta 8	ITGB8	214	8	1.46964	0.19557	0.342067
hsa04810	Regulation of actin cytoskeleton	ARHGEF6	COOL2|Cool-2|MRX46|PIXA|alpha-PIX|alphaPIX	Rac/Cdc42 guanine nucleotide exchange factor 6	ARHGEF6	214	8	1.46964	0.19557	0.342067
hsa04810	Regulation of actin cytoskeleton	PIK3CA	CLOVE|CWS5|MCAP|MCM|MCMTC|PI3K|p110-alpha	phosphatidylinositol-4,5-bisphosphate 3-kinase catalytic subunit alpha	PIK3C	214	8	1.46964	0.19557	0.342067
hsa04810	Regulation of actin cytoskeleton	RDX	DFNB24	radixin	RDX	214	8	1.46964	0.19557	0.342067
hsa05145	Toxoplasmosis	HLA-DQA1	CD|CELIAC1|DQ-A1|GSE|HLA-DQA	major histocompatibility complex, class II, DQ alpha 1	MHC2	118	5	1.6658	0.19559	0.342067
hsa05145	Toxoplasmosis	HLA-DRB4	DR-4|DR4|DRB4|HLA-DR4B	major histocompatibility complex, class II, DR beta 4	MHC2	118	5	1.6658	0.19559	0.342067
hsa05145	Toxoplasmosis	BIRC2	API1|HIAP2|Hiap-2|MIHB|RNF48|c-IAP1|cIAP1	baculoviral IAP repeat containing 2	BIRC2_3	118	5	1.6658	0.19559	0.342067
hsa05145	Toxoplasmosis	HSPA1B	HSP70-1B|HSP70-2|HSP70.2	heat shock protein family A (Hsp70) member 1B	HSPA1_8	118	5	1.6658	0.19559	0.342067
hsa05145	Toxoplasmosis	PIK3CA	CLOVE|CWS5|MCAP|MCM|MCMTC|PI3K|p110-alpha	phosphatidylinositol-4,5-bisphosphate 3-kinase catalytic subunit alpha	PIK3C	118	5	1.6658	0.19559	0.342067
hsa05310	Asthma	HLA-DQA1	CD|CELIAC1|DQ-A1|GSE|HLA-DQA	major histocompatibility complex, class II, DQ alpha 1	MHC2	31	2	2.53631	0.198849	0.346242
hsa05310	Asthma	HLA-DRB4	DR-4|DR4|DRB4|HLA-DR4B	major histocompatibility complex, class II, DR beta 4	MHC2	31	2	2.53631	0.198849	0.346242
hsa00561	Glycerolipid metabolism	GK	GK1|GKD	glycerol kinase	glpK	59	3	1.99896	0.201911	0.349275
hsa00561	Glycerolipid metabolism	MBOAT2	LPAAT|LPCAT4|LPEAT|LPLAT 2|OACT2	membrane bound O-acyltransferase domain containing 2	MBOAT1_2	59	3	1.99896	0.201911	0.349275
hsa00561	Glycerolipid metabolism	CEL	BAL|BSDL|BSSL|CELL|CEase|FAP|FAPP|LIPA|MODY8	carboxyl ester lipase	CEL	59	3	1.99896	0.201911	0.349275
hsa04211	Longevity regulating pathway - mammal	PIK3CA	CLOVE|CWS5|MCAP|MCM|MCMTC|PI3K|p110-alpha	phosphatidylinositol-4,5-bisphosphate 3-kinase catalytic subunit alpha	PIK3C	94	4	1.67289	0.229894	0.383857
hsa04211	Longevity regulating pathway - mammal	RB1CC1	ATG17|CC1|FIP200|PPP1R131	RB1 inducible coiled-coil 1	RB1CC1	94	4	1.67289	0.229894	0.383857
hsa04211	Longevity regulating pathway - mammal	PRKAA2	AMPK|AMPK2|AMPKa2|PRKAA	protein kinase, AMP-activated, alpha 2 catalytic subunit	PRKAA	94	4	1.67289	0.229894	0.383857
hsa04211	Longevity regulating pathway - mammal	SESN3	SEST3	sestrin 3	SESN	94	4	1.67289	0.229894	0.383857
hsa05200	Pathways in cancer	PTGER3	EP3|EP3-I|EP3-II|EP3-III|EP3-IV|EP3-VI|EP3e|PGE2-R	prostaglandin E receptor 3	PTGER3	397	13	1.28732	0.232955	0.383857
hsa05200	Pathways in cancer	PIK3CA	CLOVE|CWS5|MCAP|MCM|MCMTC|PI3K|p110-alpha	phosphatidylinositol-4,5-bisphosphate 3-kinase catalytic subunit alpha	PIK3C	397	13	1.28732	0.232955	0.383857
hsa05200	Pathways in cancer	PTGS2	COX-2|COX2|GRIPGHS|PGG/HS|PGHS-2|PHS-2|hCox-2	prostaglandin-endoperoxide synthase 2 (prostaglandin G/H synthase and cyclooxygenase)	PTGS2	397	13	1.28732	0.232955	0.383857
hsa05200	Pathways in cancer	BIRC2	API1|HIAP2|Hiap-2|MIHB|RNF48|c-IAP1|cIAP1	baculoviral IAP repeat containing 2	BIRC2_3	397	13	1.28732	0.232955	0.383857
hsa05200	Pathways in cancer	EDNRA	ET-A|ETA|ETA-R|ETAR|ETRA|MFDA|hET-AR	endothelin receptor type A	EDNRA	397	13	1.28732	0.232955	0.383857
hsa05200	Pathways in cancer	PDGFRA	CD140A|GAS9|PDGFR-2|PDGFR2|RHEPDGFRA	platelet derived growth factor receptor alpha	PDGFRA	397	13	1.28732	0.232955	0.383857
hsa05200	Pathways in cancer	FGF1	AFGF|ECGF|ECGF-beta|ECGFA|ECGFB|FGF-1|FGF-alpha|FGFA|GLIO703|HBGF-1|HBGF1	fibroblast growth factor 1	FGF1	397	13	1.28732	0.232955	0.383857
hsa05200	Pathways in cancer	FGF7	HBGF-7|KGF	fibroblast growth factor 7	FGF	397	13	1.28732	0.232955	0.383857
hsa05200	Pathways in cancer	FOS	AP-1|C-FOS|p55	FBJ murine osteosarcoma viral oncogene homolog	FOS	397	13	1.28732	0.232955	0.383857
hsa05200	Pathways in cancer	CXCL8	GCP-1|GCP1|IL8|LECT|LUCT|LYNAP|MDNCF|MONAP|NAF|NAP-1|NAP1	chemokine (C-X-C motif) ligand 8	IL8	397	13	1.28732	0.232955	0.383857
hsa05200	Pathways in cancer	IL6	BSF-2|BSF2|CDF|HGF|HSF|IFN-beta-2|IFNB2|IL-6	interleukin 6	IL6	397	13	1.28732	0.232955	0.383857
hsa05200	Pathways in cancer	FAS	ALPS1A|APO-1|APT1|CD95|FAS1|FASTM|TNFRSF6	Fas cell surface death receptor	TNFRSF6	397	13	1.28732	0.232955	0.383857
hsa05200	Pathways in cancer	PTCH1	BCNS|HPE7|NBCCS|PTC|PTC1|PTCH|PTCH11	patched 1	PTCH1	397	13	1.28732	0.232955	0.383857
hsa04623	Cytosolic DNA-sensing pathway	DDX58	RIG-I|RIGI|RLR-1|SGMRT2	DEXD/H-box helicase 58	DDX58	64	3	1.84279	0.234472	0.383857
hsa04623	Cytosolic DNA-sensing pathway	IL6	BSF-2|BSF2|CDF|HGF|HSF|IFN-beta-2|IFNB2|IL-6	interleukin 6	IL6	64	3	1.84279	0.234472	0.383857
hsa04623	Cytosolic DNA-sensing pathway	IL1B	IL-1|IL1-BETA|IL1F2	interleukin 1 beta	IL1B	64	3	1.84279	0.234472	0.383857
hsa04924	Renin secretion	PDE1A	CAM-PDE-1A|HCAM-1|HCAM1|HSPDE1A	phosphodiesterase 1A	PDE1	64	3	1.84279	0.234472	0.383857
hsa04924	Renin secretion	PDE3A	CGI-PDE|CGI-PDE A|CGI-PDE-A|HTNB	phosphodiesterase 3A	PDE3A	64	3	1.84279	0.234472	0.383857
hsa04924	Renin secretion	EDNRA	ET-A|ETA|ETA-R|ETAR|ETRA|MFDA|hET-AR	endothelin receptor type A	EDNRA	64	3	1.84279	0.234472	0.383857
hsa04213	Longevity regulating pathway - multiple species	PIK3CA	CLOVE|CWS5|MCAP|MCM|MCMTC|PI3K|p110-alpha	phosphatidylinositol-4,5-bisphosphate 3-kinase catalytic subunit alpha	PIK3C	64	3	1.84279	0.234472	0.383857
hsa04213	Longevity regulating pathway - multiple species	PRKAA2	AMPK|AMPK2|AMPKa2|PRKAA	protein kinase, AMP-activated, alpha 2 catalytic subunit	PRKAA	64	3	1.84279	0.234472	0.383857
hsa04213	Longevity regulating pathway - multiple species	HSPA1B	HSP70-1B|HSP70-2|HSP70.2	heat shock protein family A (Hsp70) member 1B	HSPA1_8	64	3	1.84279	0.234472	0.383857
hsa05214	Glioma	PDGFRA	CD140A|GAS9|PDGFR-2|PDGFR2|RHEPDGFRA	platelet derived growth factor receptor alpha	PDGFRA	65	3	1.81444	0.241092	0.387661
hsa05214	Glioma	SHC4	RaLP|SHCD	SHC (Src homology 2 domain containing) family member 4	SHC4	65	3	1.81444	0.241092	0.387661
hsa05214	Glioma	PIK3CA	CLOVE|CWS5|MCAP|MCM|MCMTC|PI3K|p110-alpha	phosphatidylinositol-4,5-bisphosphate 3-kinase catalytic subunit alpha	PIK3C	65	3	1.81444	0.241092	0.387661
hsa05206	MicroRNAs in cancer	MIR21	MIRN21|hsa-mir-21|miR-21|miRNA21	microRNA 21	MIR21	297	10	1.32366	0.243142	0.387661
hsa05206	MicroRNAs in cancer	MIR29A	MIRN29|MIRN29A|hsa-mir-29|hsa-mir-29a|miRNA29A|mir-29a	microRNA 29a	MIR29A	297	10	1.32366	0.243142	0.387661
hsa05206	MicroRNAs in cancer	RDX	DFNB24	radixin	RDX	297	10	1.32366	0.243142	0.387661
hsa05206	MicroRNAs in cancer	THBS1	THBS|THBS-1|TSP|TSP-1|TSP1	thrombospondin 1	THBS1	297	10	1.32366	0.243142	0.387661
hsa05206	MicroRNAs in cancer	MIR199A2	MIR-199-s|MIRN199A2|mir-199a-2	microRNA 199a-2	MIR199A	297	10	1.32366	0.243142	0.387661
hsa05206	MicroRNAs in cancer	PTGS2	COX-2|COX2|GRIPGHS|PGG/HS|PGHS-2|PHS-2|hCox-2	prostaglandin-endoperoxide synthase 2 (prostaglandin G/H synthase and cyclooxygenase)	PTGS2	297	10	1.32366	0.243142	0.387661
hsa05206	MicroRNAs in cancer	PDGFRA	CD140A|GAS9|PDGFR-2|PDGFR2|RHEPDGFRA	platelet derived growth factor receptor alpha	PDGFRA	297	10	1.32366	0.243142	0.387661
hsa05206	MicroRNAs in cancer	SHC4	RaLP|SHCD	SHC (Src homology 2 domain containing) family member 4	SHC4	297	10	1.32366	0.243142	0.387661
hsa05206	MicroRNAs in cancer	MARCKS	80K-L|MACS|PKCSL|PRKCSL	myristoylated alanine-rich protein kinase C substrate	MARCKS	297	10	1.32366	0.243142	0.387661
hsa05206	MicroRNAs in cancer	PIK3CA	CLOVE|CWS5|MCAP|MCM|MCMTC|PI3K|p110-alpha	phosphatidylinositol-4,5-bisphosphate 3-kinase catalytic subunit alpha	PIK3C	297	10	1.32366	0.243142	0.387661
hsa03030	DNA replication	RFC1	A1|MHCBFB|PO-GA|RECC1|RFC|RFC140	replication factor C subunit 1	RFC1	36	2	2.18405	0.244843	0.38881
hsa03030	DNA replication	MCM2	BM28|CCNL1|CDCL1|D3S3194|MITOTIN|cdc19	minichromosome maintenance complex component 2	MCM2	36	2	2.18405	0.244843	0.38881
hsa04915	Estrogen signaling pathway	HSPA1B	HSP70-1B|HSP70-2|HSP70.2	heat shock protein family A (Hsp70) member 1B	HSPA1_8	99	4	1.5884	0.256756	0.401592
hsa04915	Estrogen signaling pathway	FOS	AP-1|C-FOS|p55	FBJ murine osteosarcoma viral oncogene homolog	FOS	99	4	1.5884	0.256756	0.401592
hsa04915	Estrogen signaling pathway	SHC4	RaLP|SHCD	SHC (Src homology 2 domain containing) family member 4	SHC4	99	4	1.5884	0.256756	0.401592
hsa04915	Estrogen signaling pathway	PIK3CA	CLOVE|CWS5|MCAP|MCM|MCMTC|PI3K|p110-alpha	phosphatidylinositol-4,5-bisphosphate 3-kinase catalytic subunit alpha	PIK3C	99	4	1.5884	0.256756	0.401592
hsa04024	cAMP signaling pathway	EDNRA	ET-A|ETA|ETA-R|ETAR|ETRA|MFDA|hET-AR	endothelin receptor type A	EDNRA	199	7	1.38286	0.258455	0.401592
hsa04024	cAMP signaling pathway	PTGER3	EP3|EP3-I|EP3-II|EP3-III|EP3-IV|EP3-VI|EP3e|PGE2-R	prostaglandin E receptor 3	PTGER3	199	7	1.38286	0.258455	0.401592
hsa04024	cAMP signaling pathway	PIK3CA	CLOVE|CWS5|MCAP|MCM|MCMTC|PI3K|p110-alpha	phosphatidylinositol-4,5-bisphosphate 3-kinase catalytic subunit alpha	PIK3C	199	7	1.38286	0.258455	0.401592
hsa04024	cAMP signaling pathway	FOS	AP-1|C-FOS|p55	FBJ murine osteosarcoma viral oncogene homolog	FOS	199	7	1.38286	0.258455	0.401592
hsa04024	cAMP signaling pathway	PTCH1	BCNS|HPE7|NBCCS|PTC|PTC1|PTCH|PTCH11	patched 1	PTCH1	199	7	1.38286	0.258455	0.401592
hsa04024	cAMP signaling pathway	ATP1B3	ATPB-3|CD298	ATPase, Na+/K+ transporting, beta 3 polypeptide	ATP1B	199	7	1.38286	0.258455	0.401592
hsa04024	cAMP signaling pathway	PDE3A	CGI-PDE|CGI-PDE A|CGI-PDE-A|HTNB	phosphodiesterase 3A	PDE3A	199	7	1.38286	0.258455	0.401592
hsa05146	Amoebiasis	IL1B	IL-1|IL1-BETA|IL1F2	interleukin 1 beta	IL1B	100	4	1.57251	0.262202	0.404249
hsa05146	Amoebiasis	IL6	BSF-2|BSF2|CDF|HGF|HSF|IFN-beta-2|IFNB2|IL-6	interleukin 6	IL6	100	4	1.57251	0.262202	0.404249
hsa05146	Amoebiasis	CXCL8	GCP-1|GCP1|IL8|LECT|LUCT|LYNAP|MDNCF|MONAP|NAF|NAP-1|NAP1	chemokine (C-X-C motif) ligand 8	IL8	100	4	1.57251	0.262202	0.404249
hsa05146	Amoebiasis	PIK3CA	CLOVE|CWS5|MCAP|MCM|MCMTC|PI3K|p110-alpha	phosphatidylinositol-4,5-bisphosphate 3-kinase catalytic subunit alpha	PIK3C	100	4	1.57251	0.262202	0.404249
hsa05231	Choline metabolism in cancer	PDGFRA	CD140A|GAS9|PDGFR-2|PDGFR2|RHEPDGFRA	platelet derived growth factor receptor alpha	PDGFRA	101	4	1.55694	0.267668	0.40612
hsa05231	Choline metabolism in cancer	PIK3CA	CLOVE|CWS5|MCAP|MCM|MCMTC|PI3K|p110-alpha	phosphatidylinositol-4,5-bisphosphate 3-kinase catalytic subunit alpha	PIK3C	101	4	1.55694	0.267668	0.40612
hsa05231	Choline metabolism in cancer	FOS	AP-1|C-FOS|p55	FBJ murine osteosarcoma viral oncogene homolog	FOS	101	4	1.55694	0.267668	0.40612
hsa05231	Choline metabolism in cancer	GPCPD1	EDI3|GDE5|GDPD6|PREI4	glycerophosphocholine phosphodiesterase 1	GPCPD1	101	4	1.55694	0.267668	0.40612
hsa03040	Spliceosome	U2SURP	SR140|fSAPa	U2 snRNP-associated SURP domain containing	SR140	134	5	1.4669	0.268019	0.40612
hsa03040	Spliceosome	HSPA1B	HSP70-1B|HSP70-2|HSP70.2	heat shock protein family A (Hsp70) member 1B	HSPA1_8	134	5	1.4669	0.268019	0.40612
hsa03040	Spliceosome	THOC1	HPR1|P84|P84N5	THO complex 1	THOC1	134	5	1.4669	0.268019	0.40612
hsa03040	Spliceosome	SRSF1	ASF|SF2|SF2p33|SFRS1|SRp30a	serine/arginine-rich splicing factor 1	SFRS1_9	134	5	1.4669	0.268019	0.40612
hsa03040	Spliceosome	HNRNPU	HNRNPU-AS1|HNRPU|SAF-A|SAFA|U21.1|hnRNP U	heterogeneous nuclear ribonucleoprotein U (scaffold attachment factor A)	HNRNPU	134	5	1.4669	0.268019	0.40612
hsa05205	Proteoglycans in cancer	PIK3CA	CLOVE|CWS5|MCAP|MCM|MCMTC|PI3K|p110-alpha	phosphatidylinositol-4,5-bisphosphate 3-kinase catalytic subunit alpha	PIK3C	203	7	1.35562	0.273552	0.408266
hsa05205	Proteoglycans in cancer	MIR21	MIRN21|hsa-mir-21|miR-21|miRNA21	microRNA 21	MIR21	203	7	1.35562	0.273552	0.408266
hsa05205	Proteoglycans in cancer	THBS1	THBS|THBS-1|TSP|TSP-1|TSP1	thrombospondin 1	THBS1	203	7	1.35562	0.273552	0.408266
hsa05205	Proteoglycans in cancer	FAS	ALPS1A|APO-1|APT1|CD95|FAS1|FASTM|TNFRSF6	Fas cell surface death receptor	TNFRSF6	203	7	1.35562	0.273552	0.408266
hsa05205	Proteoglycans in cancer	PLAUR	CD87|U-PAR|UPAR|URKR	plasminogen activator, urokinase receptor	PLAUR	203	7	1.35562	0.273552	0.408266
hsa05205	Proteoglycans in cancer	RDX	DFNB24	radixin	RDX	203	7	1.35562	0.273552	0.408266
hsa05205	Proteoglycans in cancer	PTCH1	BCNS|HPE7|NBCCS|PTC|PTC1|PTCH|PTCH11	patched 1	PTCH1	203	7	1.35562	0.273552	0.408266
hsa04622	RIG-I-like receptor signaling pathway	DDX58	RIG-I|RIGI|RLR-1|SGMRT2	DEXD/H-box helicase 58	DDX58	70	3	1.68484	0.274577	0.408266
hsa04622	RIG-I-like receptor signaling pathway	IFIH1	AGS7|Hlcd|IDDM19|MDA-5|MDA5|RLR-2|SGMRT1	interferon induced, with helicase C domain 1	IFIH1	70	3	1.68484	0.274577	0.408266
hsa04622	RIG-I-like receptor signaling pathway	CXCL8	GCP-1|GCP1|IL8|LECT|LUCT|LYNAP|MDNCF|MONAP|NAF|NAP-1|NAP1	chemokine (C-X-C motif) ligand 8	IL8	70	3	1.68484	0.274577	0.408266
hsa05219	Bladder cancer	THBS1	THBS|THBS-1|TSP|TSP-1|TSP1	thrombospondin 1	THBS1	41	2	1.9177	0.291144	0.431285
hsa05219	Bladder cancer	CXCL8	GCP-1|GCP1|IL8|LECT|LUCT|LYNAP|MDNCF|MONAP|NAF|NAP-1|NAP1	chemokine (C-X-C motif) ligand 8	IL8	41	2	1.9177	0.291144	0.431285
hsa03450	Non-homologous end-joining	DCLRE1C	A-SCID|DCLREC1C|RS-SCID|SCIDA|SNM1C	DNA cross-link repair 1C	DCLRE1C	13	1	3.02407	0.297621	0.440057
hsa04931	Insulin resistance	PIK3CA	CLOVE|CWS5|MCAP|MCM|MCMTC|PI3K|p110-alpha	phosphatidylinositol-4,5-bisphosphate 3-kinase catalytic subunit alpha	PIK3C	109	4	1.44267	0.311976	0.457872
hsa04931	Insulin resistance	IL6	BSF-2|BSF2|CDF|HGF|HSF|IFN-beta-2|IFNB2|IL-6	interleukin 6	IL6	109	4	1.44267	0.311976	0.457872
hsa04931	Insulin resistance	SOCS3	ATOD4|CIS3|Cish3|SOCS-3|SSI-3|SSI3	suppressor of cytokine signaling 3	SOCS3	109	4	1.44267	0.311976	0.457872
hsa04931	Insulin resistance	PRKAA2	AMPK|AMPK2|AMPKa2|PRKAA	protein kinase, AMP-activated, alpha 2 catalytic subunit	PRKAA	109	4	1.44267	0.311976	0.457872
hsa04973	Carbohydrate digestion and absorption	ATP1B3	ATPB-3|CD298	ATPase, Na+/K+ transporting, beta 3 polypeptide	ATP1B	45	2	1.74724	0.327915	0.478231
hsa04973	Carbohydrate digestion and absorption	PIK3CA	CLOVE|CWS5|MCAP|MCM|MCMTC|PI3K|p110-alpha	phosphatidylinositol-4,5-bisphosphate 3-kinase catalytic subunit alpha	PIK3C	45	2	1.74724	0.327915	0.478231
hsa04260	Cardiac muscle contraction	CACNB4	CAB4|CACNLB4|EA5|EIG9|EJM|EJM4|EJM6	calcium channel, voltage-dependent, beta 4 subunit	CACNB4	78	3	1.51203	0.328859	0.478231
hsa04260	Cardiac muscle contraction	ATP1B3	ATPB-3|CD298	ATPase, Na+/K+ transporting, beta 3 polypeptide	ATP1B	78	3	1.51203	0.328859	0.478231
hsa04260	Cardiac muscle contraction	CACNA2D1	CACNA2|CACNL2A|CCHL2A|LINC01112|lncRNA-N3	calcium channel, voltage-dependent, alpha 2/delta subunit 1	CACNA2D1	78	3	1.51203	0.328859	0.478231
hsa04261	Adrenergic signaling in cardiomyocytes	ATP1B3	ATPB-3|CD298	ATPase, Na+/K+ transporting, beta 3 polypeptide	ATP1B	148	5	1.32814	0.335222	0.481066
hsa04261	Adrenergic signaling in cardiomyocytes	SCN7A	NaG|Nav2.1|Nav2.2|SCN6A	sodium channel, voltage gated, type VII alpha subunit	SCN7A	148	5	1.32814	0.335222	0.481066
hsa04261	Adrenergic signaling in cardiomyocytes	CACNB4	CAB4|CACNLB4|EA5|EIG9|EJM|EJM4|EJM6	calcium channel, voltage-dependent, beta 4 subunit	CACNB4	148	5	1.32814	0.335222	0.481066
hsa04261	Adrenergic signaling in cardiomyocytes	PIK3CA	CLOVE|CWS5|MCAP|MCM|MCMTC|PI3K|p110-alpha	phosphatidylinositol-4,5-bisphosphate 3-kinase catalytic subunit alpha	PIK3C	148	5	1.32814	0.335222	0.481066
hsa04261	Adrenergic signaling in cardiomyocytes	CACNA2D1	CACNA2|CACNL2A|CCHL2A|LINC01112|lncRNA-N3	calcium channel, voltage-dependent, alpha 2/delta subunit 1	CACNA2D1	148	5	1.32814	0.335222	0.481066
hsa04610	Complement and coagulation cascades	TFPI	EPI|LACI|TFI|TFPI1	tissue factor pathway inhibitor	TFPI	79	3	1.49289	0.335655	0.481066
hsa04610	Complement and coagulation cascades	PLAUR	CD87|U-PAR|UPAR|URKR	plasminogen activator, urokinase receptor	PLAUR	79	3	1.49289	0.335655	0.481066
hsa04610	Complement and coagulation cascades	CD46	AHUS2|MCP|MIC10|TLX|TRA2.10	CD46 molecule	CD46	79	3	1.49289	0.335655	0.481066
hsa03420	Nucleotide excision repair	CCNH	CAK|CycH|p34|p37	cyclin H	CCNH	47	2	1.67289	0.346106	0.494259
hsa03420	Nucleotide excision repair	RFC1	A1|MHCBFB|PO-GA|RECC1|RFC|RFC140	replication factor C subunit 1	RFC1	47	2	1.67289	0.346106	0.494259
hsa00520	Amino sugar and nucleotide sugar metabolism	UAP1	AGX|AGX1|AGX2|SPAG2	UDP-N-acetylglucosamine pyrophosphorylase 1	UAP1	48	2	1.63804	0.355139	0.500302
hsa00520	Amino sugar and nucleotide sugar metabolism	PGM2	MSTP006	phosphoglucomutase 2	PGM2	48	2	1.63804	0.355139	0.500302
hsa04330	Notch signaling pathway	HES1	HES-1|HHL|HRY|bHLHb39	hes family bHLH transcription factor 1	HES1	48	2	1.63804	0.355139	0.500302
hsa04330	Notch signaling pathway	CIR1	CIR	corepressor interacting with RBPJ, 1	CIR	48	2	1.63804	0.355139	0.500302
hsa04930	Type II diabetes mellitus	PIK3CA	CLOVE|CWS5|MCAP|MCM|MCMTC|PI3K|p110-alpha	phosphatidylinositol-4,5-bisphosphate 3-kinase catalytic subunit alpha	PIK3C	48	2	1.63804	0.355139	0.500302
hsa04930	Type II diabetes mellitus	SOCS3	ATOD4|CIS3|Cish3|SOCS-3|SSI-3|SSI3	suppressor of cytokine signaling 3	SOCS3	48	2	1.63804	0.355139	0.500302
hsa04512	ECM-receptor interaction	THBS1	THBS|THBS-1|TSP|TSP-1|TSP1	thrombospondin 1	THBS1	82	3	1.43827	0.356008	0.500302
hsa04512	ECM-receptor interaction	ITGA1	CD49a|VLA1	integrin subunit alpha 1	ITGA1	82	3	1.43827	0.356008	0.500302
hsa04512	ECM-receptor interaction	ITGB8	-	integrin subunit beta 8	ITGB8	82	3	1.43827	0.356008	0.500302
hsa00120	Primary bile acid biosynthesis	CH25H	C25H	cholesterol 25-hydroxylase	CH25H	17	1	2.31252	0.364976	0.511095
hsa00450	Selenocompound metabolism	CTH	-	cystathionine gamma-lyase	CTH	17	1	2.31252	0.364976	0.511095
hsa04978	Mineral absorption	TRPM7	ALSPDC|CHAK|CHAK1|LTRPC7|LTrpC-7|TRP-PLIK	transient receptor potential cation channel, subfamily M, member 7	TRPM7	51	2	1.54168	0.381946	0.53163
hsa04978	Mineral absorption	ATP1B3	ATPB-3|CD298	ATPase, Na+/K+ transporting, beta 3 polypeptide	ATP1B	51	2	1.54168	0.381946	0.53163
hsa05222	Small cell lung cancer	PIK3CA	CLOVE|CWS5|MCAP|MCM|MCMTC|PI3K|p110-alpha	phosphatidylinositol-4,5-bisphosphate 3-kinase catalytic subunit alpha	PIK3C	86	3	1.37138	0.382988	0.53163
hsa05222	Small cell lung cancer	BIRC2	API1|HIAP2|Hiap-2|MIHB|RNF48|c-IAP1|cIAP1	baculoviral IAP repeat containing 2	BIRC2_3	86	3	1.37138	0.382988	0.53163
hsa05222	Small cell lung cancer	PTGS2	COX-2|COX2|GRIPGHS|PGG/HS|PGHS-2|PHS-2|hCox-2	prostaglandin-endoperoxide synthase 2 (prostaglandin G/H synthase and cyclooxygenase)	PTGS2	86	3	1.37138	0.382988	0.53163
hsa04110	Cell cycle	CCNH	CAK|CycH|p34|p37	cyclin H	CCNH	124	4	1.26816	0.395999	0.545874
hsa04110	Cell cycle	GADD45B	GADD45BETA|MYD118	growth arrest and DNA damage inducible beta	GADD45	124	4	1.26816	0.395999	0.545874
hsa04110	Cell cycle	ORC2	ORC2L	origin recognition complex subunit 2	ORC2	124	4	1.26816	0.395999	0.545874
hsa04110	Cell cycle	MCM2	BM28|CCNL1|CDCL1|D3S3194|MITOTIN|cdc19	minichromosome maintenance complex component 2	MCM2	124	4	1.26816	0.395999	0.545874
hsa03460	Fanconi anemia pathway	HES1	HES-1|HHL|HRY|bHLHb39	hes family bHLH transcription factor 1	HES1	53	2	1.4835	0.399543	0.548853
hsa03460	Fanconi anemia pathway	POLK	DINB1|DINP|POLQ	polymerase (DNA directed) kappa	POLK	53	2	1.4835	0.399543	0.548853
hsa04974	Protein digestion and absorption	ATP1B3	ATPB-3|CD298	ATPase, Na+/K+ transporting, beta 3 polypeptide	ATP1B	90	3	1.31043	0.409686	0.55988
hsa04974	Protein digestion and absorption	SLC38A2	ATA2|PRO1068|SAT2|SNAT2	solute carrier family 38 member 2	SLC38A2	90	3	1.31043	0.409686	0.55988
hsa04974	Protein digestion and absorption	COL10A1	-	collagen type X alpha 1	COL10A	90	3	1.31043	0.409686	0.55988
hsa00100	Steroid biosynthesis	CEL	BAL|BSDL|BSSL|CELL|CEase|FAP|FAPP|LIPA|MODY8	carboxyl ester lipase	CEL	20	1	1.96564	0.411196	0.560979
hsa05032	Morphine addiction	PDE1A	CAM-PDE-1A|HCAM-1|HCAM1|HSPDE1A	phosphodiesterase 1A	PDE1	91	3	1.29603	0.416304	0.565035
hsa05032	Morphine addiction	PDE3A	CGI-PDE|CGI-PDE A|CGI-PDE-A|HTNB	phosphodiesterase 3A	PDE3A	91	3	1.29603	0.416304	0.565035
hsa05032	Morphine addiction	PDE10A	HSPDE10A	phosphodiesterase 10A	PDE10	91	3	1.29603	0.416304	0.565035
hsa05223	Non-small cell lung cancer	PIK3CA	CLOVE|CWS5|MCAP|MCM|MCMTC|PI3K|p110-alpha	phosphatidylinositol-4,5-bisphosphate 3-kinase catalytic subunit alpha	PIK3C	56	2	1.40403	0.425474	0.573625
hsa05223	Non-small cell lung cancer	EML4	C2orf2|ELP120|EMAP-4|EMAPL4|ROPP120	echinoderm microtubule associated protein like 4	EML4	56	2	1.40403	0.425474	0.573625
hsa04022	cGMP - PKG signaling pathway	EDNRA	ET-A|ETA|ETA-R|ETAR|ETRA|MFDA|hET-AR	endothelin receptor type A	EDNRA	167	5	1.17703	0.42769	0.573625
hsa04022	cGMP - PKG signaling pathway	ATP1B3	ATPB-3|CD298	ATPase, Na+/K+ transporting, beta 3 polypeptide	ATP1B	167	5	1.17703	0.42769	0.573625
hsa04022	cGMP - PKG signaling pathway	RGS2	G0S8	regulator of G-protein signaling 2	RGS2	167	5	1.17703	0.42769	0.573625
hsa04022	cGMP - PKG signaling pathway	PDE3A	CGI-PDE|CGI-PDE A|CGI-PDE-A|HTNB	phosphodiesterase 3A	PDE3A	167	5	1.17703	0.42769	0.573625
hsa04022	cGMP - PKG signaling pathway	PIK3CA	CLOVE|CWS5|MCAP|MCM|MCMTC|PI3K|p110-alpha	phosphatidylinositol-4,5-bisphosphate 3-kinase catalytic subunit alpha	PIK3C	167	5	1.17703	0.42769	0.573625
hsa04141	Protein processing in endoplasmic reticulum	TUSC3	D8S1992|M33|MRT22|MRT7|N33|OST3A	tumor suppressor candidate 3	OST3	169	5	1.1631	0.437321	0.581629
hsa04141	Protein processing in endoplasmic reticulum	HSPA1B	HSP70-1B|HSP70-2|HSP70.2	heat shock protein family A (Hsp70) member 1B	HSPA1_8	169	5	1.1631	0.437321	0.581629
hsa04141	Protein processing in endoplasmic reticulum	EIF2AK2	EIF2AK1|PKR|PPP1R83|PRKR	eukaryotic translation initiation factor 2 alpha kinase 2	EIF2AK2	169	5	1.1631	0.437321	0.581629
hsa04141	Protein processing in endoplasmic reticulum	ATF6	ACHM7|ATF6A	activating transcription factor 6	ATF6A	169	5	1.1631	0.437321	0.581629
hsa04141	Protein processing in endoplasmic reticulum	DDIT3	CEBPZ|CHOP|CHOP-10|CHOP10|GADD153	DNA damage inducible transcript 3	DDIT3	169	5	1.1631	0.437321	0.581629
hsa00564	Glycerophospholipid metabolism	MBOAT2	LPAAT|LPCAT4|LPEAT|LPLAT 2|OACT2	membrane bound O-acyltransferase domain containing 2	MBOAT1_2	95	3	1.24146	0.44251	0.585588
hsa00564	Glycerophospholipid metabolism	GPCPD1	EDI3|GDE5|GDPD6|PREI4	glycerophosphocholine phosphodiesterase 1	GPCPD1	95	3	1.24146	0.44251	0.585588
hsa00564	Glycerophospholipid metabolism	ETNK1	EKI|EKI 1|EKI1|Nbla10396	ethanolamine kinase 1	ETNK	95	3	1.24146	0.44251	0.585588
hsa03430	Mismatch repair	RFC1	A1|MHCBFB|PO-GA|RECC1|RFC|RFC140	replication factor C subunit 1	RFC1	23	1	1.70925	0.454036	0.596202
hsa04614	Renin-angiotensin system	ENPEP	APA|CD249|gp160	glutamyl aminopeptidase	ENPEP	23	1	1.70925	0.454036	0.596202
hsa04964	Proximal tubule bicarbonate reclamation	ATP1B3	ATPB-3|CD298	ATPase, Na+/K+ transporting, beta 3 polypeptide	ATP1B	23	1	1.70925	0.454036	0.596202
hsa01040	Biosynthesis of unsaturated fatty acids	HACD4	PTPLAD2	3-hydroxyacyl-CoA dehydratase 4	PHS1	23	1	1.70925	0.454036	0.596202
hsa05322	Systemic lupus erythematosus	H3F3B	H3.3B	H3 histone, family 3B (H3.3B)	H3	135	4	1.16483	0.456537	0.596202
hsa05322	Systemic lupus erythematosus	HLA-DQA1	CD|CELIAC1|DQ-A1|GSE|HLA-DQA	major histocompatibility complex, class II, DQ alpha 1	MHC2	135	4	1.16483	0.456537	0.596202
hsa05322	Systemic lupus erythematosus	HLA-DRB4	DR-4|DR4|DRB4|HLA-DR4B	major histocompatibility complex, class II, DR beta 4	MHC2	135	4	1.16483	0.456537	0.596202
hsa05322	Systemic lupus erythematosus	FCGR3B	CD16|CD16b|FCG3|FCGR3|FCR-10|FCRIII|FCRIIIb	Fc fragment of IgG receptor IIIb	FCGR3	135	4	1.16483	0.456537	0.596202
hsa04150	mTOR signaling pathway	PIK3CA	CLOVE|CWS5|MCAP|MCM|MCMTC|PI3K|p110-alpha	phosphatidylinositol-4,5-bisphosphate 3-kinase catalytic subunit alpha	PIK3C	60	2	1.31043	0.459092	0.597572
hsa04150	mTOR signaling pathway	PRKAA2	AMPK|AMPK2|AMPKa2|PRKAA	protein kinase, AMP-activated, alpha 2 catalytic subunit	PRKAA	60	2	1.31043	0.459092	0.597572
hsa04370	VEGF signaling pathway	PTGS2	COX-2|COX2|GRIPGHS|PGG/HS|PGHS-2|PHS-2|hCox-2	prostaglandin-endoperoxide synthase 2 (prostaglandin G/H synthase and cyclooxygenase)	PTGS2	61	2	1.28895	0.467313	0.606285
hsa04370	VEGF signaling pathway	PIK3CA	CLOVE|CWS5|MCAP|MCM|MCMTC|PI3K|p110-alpha	phosphatidylinositol-4,5-bisphosphate 3-kinase catalytic subunit alpha	PIK3C	61	2	1.28895	0.467313	0.606285
hsa05210	Colorectal cancer	PIK3CA	CLOVE|CWS5|MCAP|MCM|MCMTC|PI3K|p110-alpha	phosphatidylinositol-4,5-bisphosphate 3-kinase catalytic subunit alpha	PIK3C	62	2	1.26816	0.475458	0.61418
hsa05210	Colorectal cancer	FOS	AP-1|C-FOS|p55	FBJ murine osteosarcoma viral oncogene homolog	FOS	62	2	1.26816	0.475458	0.61418
hsa04910	Insulin signaling pathway	PIK3CA	CLOVE|CWS5|MCAP|MCM|MCMTC|PI3K|p110-alpha	phosphatidylinositol-4,5-bisphosphate 3-kinase catalytic subunit alpha	PIK3C	139	4	1.13131	0.478039	0.61418
hsa04910	Insulin signaling pathway	PRKAA2	AMPK|AMPK2|AMPKa2|PRKAA	protein kinase, AMP-activated, alpha 2 catalytic subunit	PRKAA	139	4	1.13131	0.478039	0.61418
hsa04910	Insulin signaling pathway	SHC4	RaLP|SHCD	SHC (Src homology 2 domain containing) family member 4	SHC4	139	4	1.13131	0.478039	0.61418
hsa04910	Insulin signaling pathway	SOCS3	ATOD4|CIS3|Cish3|SOCS-3|SSI-3|SSI3	suppressor of cytokine signaling 3	SOCS3	139	4	1.13131	0.478039	0.61418
hsa00062	Fatty acid elongation	HACD4	PTPLAD2	3-hydroxyacyl-CoA dehydratase 4	PHS1	25	1	1.57251	0.48084	0.61678
hsa00601	Glycosphingolipid biosynthesis - lacto and neolacto series	B3GALT2	BETA3GALT2|GLCT2|beta3Gal-T2	Beta-1,3-galactosyltransferase 2	B3GALT2	26	1	1.51203	0.493742	0.620653
hsa04950	Maturity onset diabetes of the young	HES1	HES-1|HHL|HRY|bHLHb39	hes family bHLH transcription factor 1	HES1	26	1	1.51203	0.493742	0.620653
hsa04550	Signaling pathways regulating pluripotency of stem cells	PIK3CA	CLOVE|CWS5|MCAP|MCM|MCMTC|PI3K|p110-alpha	phosphatidylinositol-4,5-bisphosphate 3-kinase catalytic subunit alpha	PIK3C	142	4	1.1074	0.493938	0.620653
hsa04550	Signaling pathways regulating pluripotency of stem cells	ID3	HEIR-1|bHLHb25	inhibitor of DNA binding 3, dominant negative helix-loop-helix protein	ID3	142	4	1.1074	0.493938	0.620653
hsa04550	Signaling pathways regulating pluripotency of stem cells	ID4	IDB4|bHLHb27	inhibitor of DNA binding 4, dominant negative helix-loop-helix protein	ID4	142	4	1.1074	0.493938	0.620653
hsa04550	Signaling pathways regulating pluripotency of stem cells	SKIL	SNO|SnoA|SnoI|SnoN	SKI-like proto-oncogene	SKIL	142	4	1.1074	0.493938	0.620653
hsa04144	Endocytosis	ZFYVE16	PPP1R69	zinc finger, FYVE domain containing 16	MADHIP	259	7	1.06251	0.494021	0.620653
hsa04144	Endocytosis	TFRC	CD71|IMD46|T9|TFR|TFR1|TR|TRFR|p90	transferrin receptor	TFRC	259	7	1.06251	0.494021	0.620653
hsa04144	Endocytosis	PDGFRA	CD140A|GAS9|PDGFR-2|PDGFR2|RHEPDGFRA	platelet derived growth factor receptor alpha	PDGFRA	259	7	1.06251	0.494021	0.620653
hsa04144	Endocytosis	HSPA1B	HSP70-1B|HSP70-2|HSP70.2	heat shock protein family A (Hsp70) member 1B	HSPA1_8	259	7	1.06251	0.494021	0.620653
hsa04144	Endocytosis	CAPZA1	CAPPA1|CAPZ|CAZ1	capping protein (actin filament) muscle Z-line, alpha 1	CAPZA	259	7	1.06251	0.494021	0.620653
hsa04144	Endocytosis	CHMP1B	C10orf2|C18-ORF2|C18orf2|CHMP1.5|Vps46-2|Vps46B|hVps46-2	charged multivesicular body protein 1B	CHMP1	259	7	1.06251	0.494021	0.620653
hsa04144	Endocytosis	HLA-C	D6S204|HLA-JY3|HLAC|HLC-C|PSORS1	major histocompatibility complex, class I, C	MHC1	259	7	1.06251	0.494021	0.620653
hsa04072	Phospholipase D signaling pathway	PDGFRA	CD140A|GAS9|PDGFR-2|PDGFR2|RHEPDGFRA	platelet derived growth factor receptor alpha	PDGFRA	144	4	1.09202	0.504419	0.62973
hsa04072	Phospholipase D signaling pathway	SHC4	RaLP|SHCD	SHC (Src homology 2 domain containing) family member 4	SHC4	144	4	1.09202	0.504419	0.62973
hsa04072	Phospholipase D signaling pathway	PIK3CA	CLOVE|CWS5|MCAP|MCM|MCMTC|PI3K|p110-alpha	phosphatidylinositol-4,5-bisphosphate 3-kinase catalytic subunit alpha	PIK3C	144	4	1.09202	0.504419	0.62973
hsa04072	Phospholipase D signaling pathway	CXCL8	GCP-1|GCP1|IL8|LECT|LUCT|LYNAP|MDNCF|MONAP|NAF|NAP-1|NAP1	chemokine (C-X-C motif) ligand 8	IL8	144	4	1.09202	0.504419	0.62973
hsa04966	Collecting duct acid secretion	ATP6V1D	ATP6M|VATD|VMA8	ATPase, H+ transporting, lysosomal 34kDa, V1 subunit D	ATPeV1D	27	1	1.45603	0.506322	0.630294
hsa05212	Pancreatic cancer	PIK3CA	CLOVE|CWS5|MCAP|MCM|MCMTC|PI3K|p110-alpha	phosphatidylinositol-4,5-bisphosphate 3-kinase catalytic subunit alpha	PIK3C	66	2	1.1913	0.507252	0.630294
hsa05212	Pancreatic cancer	ARHGEF6	COOL2|Cool-2|MRX46|PIXA|alpha-PIX|alphaPIX	Rac/Cdc42 guanine nucleotide exchange factor 6	ARHGEF6	66	2	1.1913	0.507252	0.630294
hsa05230	Central carbon metabolism in cancer	PDGFRA	CD140A|GAS9|PDGFR-2|PDGFR2|RHEPDGFRA	platelet derived growth factor receptor alpha	PDGFRA	67	2	1.17352	0.514998	0.635939
hsa05230	Central carbon metabolism in cancer	PIK3CA	CLOVE|CWS5|MCAP|MCM|MCMTC|PI3K|p110-alpha	phosphatidylinositol-4,5-bisphosphate 3-kinase catalytic subunit alpha	PIK3C	67	2	1.17352	0.514998	0.635939
hsa05031	Amphetamine addiction	FOS	AP-1|C-FOS|p55	FBJ murine osteosarcoma viral oncogene homolog	FOS	67	2	1.17352	0.514998	0.635939
hsa05031	Amphetamine addiction	FOSB	AP-1|G0S3|GOS3|GOSB	FBJ murine osteosarcoma viral oncogene homolog B	FOSB	67	2	1.17352	0.514998	0.635939
hsa00010	Glycolysis / Gluconeogenesis	ADH1C	ADH3	alcohol dehydrogenase 1C (class I), gamma polypeptide	ADH1_7	68	2	1.15626	0.522662	0.641412
hsa00010	Glycolysis / Gluconeogenesis	PGM2	MSTP006	phosphoglucomutase 2	PGM2	68	2	1.15626	0.522662	0.641412
hsa05120	Epithelial cell signaling in Helicobacter pylori infection	CXCL8	GCP-1|GCP1|IL8|LECT|LUCT|LYNAP|MDNCF|MONAP|NAF|NAP-1|NAP1	chemokine (C-X-C motif) ligand 8	IL8	68	2	1.15626	0.522662	0.641412
hsa05120	Epithelial cell signaling in Helicobacter pylori infection	ATP6V1D	ATP6M|VATD|VMA8	ATPase, H+ transporting, lysosomal 34kDa, V1 subunit D	ATPeV1D	68	2	1.15626	0.522662	0.641412
hsa04060	Cytokine-cytokine receptor interaction	CXCL2	CINC-2a|GRO2|GROb|MGSA-b|MIP-2a|MIP2|MIP2A|SCYB2	chemokine (C-X-C motif) ligand 2	CXCL1_2_3	269	7	1.02301	0.532052	0.645947
hsa04060	Cytokine-cytokine receptor interaction	CXCL8	GCP-1|GCP1|IL8|LECT|LUCT|LYNAP|MDNCF|MONAP|NAF|NAP-1|NAP1	chemokine (C-X-C motif) ligand 8	IL8	269	7	1.02301	0.532052	0.645947
hsa04060	Cytokine-cytokine receptor interaction	IL6	BSF-2|BSF2|CDF|HGF|HSF|IFN-beta-2|IFNB2|IL-6	interleukin 6	IL6	269	7	1.02301	0.532052	0.645947
hsa04060	Cytokine-cytokine receptor interaction	TNFSF13B	BAFF|BLYS|CD257|DTL|TALL-1|TALL1|THANK|TNFSF20|TNLG7A|ZTNF4	tumor necrosis factor superfamily member 13b	TNFSF13B	269	7	1.02301	0.532052	0.645947
hsa04060	Cytokine-cytokine receptor interaction	IL1B	IL-1|IL1-BETA|IL1F2	interleukin 1 beta	IL1B	269	7	1.02301	0.532052	0.645947
hsa04060	Cytokine-cytokine receptor interaction	PDGFRA	CD140A|GAS9|PDGFR-2|PDGFR2|RHEPDGFRA	platelet derived growth factor receptor alpha	PDGFRA	269	7	1.02301	0.532052	0.645947
hsa04060	Cytokine-cytokine receptor interaction	FAS	ALPS1A|APO-1|APT1|CD95|FAS1|FASTM|TNFRSF6	Fas cell surface death receptor	TNFRSF6	269	7	1.02301	0.532052	0.645947
hsa04920	Adipocytokine signaling pathway	SOCS3	ATOD4|CIS3|Cish3|SOCS-3|SSI-3|SSI3	suppressor of cytokine signaling 3	SOCS3	70	2	1.12322	0.537741	0.650863
hsa04920	Adipocytokine signaling pathway	PRKAA2	AMPK|AMPK2|AMPKa2|PRKAA	protein kinase, AMP-activated, alpha 2 catalytic subunit	PRKAA	70	2	1.12322	0.537741	0.650863
hsa00052	Galactose metabolism	PGM2	MSTP006	phosphoglucomutase 2	PGM2	30	1	1.31043	0.542206	0.655269
hsa00512	Mucin type O-glycan biosynthesis	GALNT1	GALNAC-T1	polypeptide N-acetylgalactosaminyltransferase 1	GALNT	31	1	1.26816	0.553575	0.667992
hsa04662	B cell receptor signaling pathway	FOS	AP-1|C-FOS|p55	FBJ murine osteosarcoma viral oncogene homolog	FOS	73	2	1.07706	0.559725	0.671332
hsa04662	B cell receptor signaling pathway	PIK3CA	CLOVE|CWS5|MCAP|MCM|MCMTC|PI3K|p110-alpha	phosphatidylinositol-4,5-bisphosphate 3-kinase catalytic subunit alpha	PIK3C	73	2	1.07706	0.559725	0.671332
hsa05220	Chronic myeloid leukemia	PIK3CA	CLOVE|CWS5|MCAP|MCM|MCMTC|PI3K|p110-alpha	phosphatidylinositol-4,5-bisphosphate 3-kinase catalytic subunit alpha	PIK3C	73	2	1.07706	0.559725	0.671332
hsa05220	Chronic myeloid leukemia	SHC4	RaLP|SHCD	SHC (Src homology 2 domain containing) family member 4	SHC4	73	2	1.07706	0.559725	0.671332
hsa01230	Biosynthesis of amino acids	RPE	RPE2-1	ribulose-5-phosphate-3-epimerase	rpe	74	2	1.06251	0.566883	0.675834
hsa01230	Biosynthesis of amino acids	CTH	-	cystathionine gamma-lyase	CTH	74	2	1.06251	0.566883	0.675834
hsa04971	Gastric acid secretion	KCNJ15	IRKK|KIR1.3|KIR4.2	potassium channel, inwardly rectifying subfamily J, member 15		74	2	1.06251	0.566883	0.675834
hsa04971	Gastric acid secretion	ATP1B3	ATPB-3|CD298	ATPase, Na+/K+ transporting, beta 3 polypeptide	ATP1B	74	2	1.06251	0.566883	0.675834
hsa04670	Leukocyte transendothelial migration	PIK3CA	CLOVE|CWS5|MCAP|MCM|MCMTC|PI3K|p110-alpha	phosphatidylinositol-4,5-bisphosphate 3-kinase catalytic subunit alpha	PIK3C	118	3	0.999479	0.581807	0.690515
hsa04670	Leukocyte transendothelial migration	ICAM1	BB2|CD54|P3.58	intercellular adhesion molecule 1	ICAM1	118	3	0.999479	0.581807	0.690515
hsa04670	Leukocyte transendothelial migration	ARHGAP5	GFI2|RhoGAP5|p190-B|p190BRhoGAP	Rho GTPase activating protein 5	ARHGAP5	118	3	0.999479	0.581807	0.690515
hsa04130	SNARE interactions in vesicular transport	VAMP4	VAMP-4|VAMP24	vesicle associated membrane protein 4	VAMP4	34	1	1.15626	0.586007	0.694463
hsa05100	Bacterial invasion of epithelial cells	PIK3CA	CLOVE|CWS5|MCAP|MCM|MCMTC|PI3K|p110-alpha	phosphatidylinositol-4,5-bisphosphate 3-kinase catalytic subunit alpha	PIK3C	78	2	1.00802	0.594658	0.702617
hsa05100	Bacterial invasion of epithelial cells	SHC4	RaLP|SHCD	SHC (Src homology 2 domain containing) family member 4	SHC4	78	2	1.00802	0.594658	0.702617
hsa00350	Tyrosine metabolism	ADH1C	ADH3	alcohol dehydrogenase 1C (class I), gamma polypeptide	ADH1_7	35	1	1.12322	0.596283	0.70349
hsa00040	Pentose and glucuronate interconversions	RPE	RPE2-1	ribulose-5-phosphate-3-epimerase	rpe	36	1	1.09202	0.606302	0.714249
hsa04925	Aldosterone synthesis and secretion	NR4A2	HZF-3|NOT|NURR1|RNR1|TINUR	nuclear receptor subfamily 4 group A member 2	NR4A2	81	2	0.970688	0.614588	0.721868
hsa04925	Aldosterone synthesis and secretion	NR4A1	GFRP1|HMR|N10|NAK-1|NGFIB|NP10|NUR77|TR3	nuclear receptor subfamily 4 group A member 1	NR4A1	81	2	0.970688	0.614588	0.721868
hsa05340	Primary immunodeficiency	DCLRE1C	A-SCID|DCLREC1C|RS-SCID|SCIDA|SNM1C	DNA cross-link repair 1C	DCLRE1C	37	1	1.06251	0.616071	0.722212
hsa05204	Chemical carcinogenesis	PTGS2	COX-2|COX2|GRIPGHS|PGG/HS|PGHS-2|PHS-2|hCox-2	prostaglandin-endoperoxide synthase 2 (prostaglandin G/H synthase and cyclooxygenase)	PTGS2	82	2	0.95885	0.62106	0.722212
hsa05204	Chemical carcinogenesis	ADH1C	ADH3	alcohol dehydrogenase 1C (class I), gamma polypeptide	ADH1_7	82	2	0.95885	0.62106	0.722212
hsa05010	Alzheimer's disease	NDUFB2	AGGG|CI-AGGG	NADH:ubiquinone oxidoreductase subunit B2	NDUFB2	168	4	0.93602	0.621248	0.722212
hsa05010	Alzheimer's disease	FAS	ALPS1A|APO-1|APT1|CD95|FAS1|FASTM|TNFRSF6	Fas cell surface death receptor	TNFRSF6	168	4	0.93602	0.621248	0.722212
hsa05010	Alzheimer's disease	ATF6	ACHM7|ATF6A	activating transcription factor 6	ATF6A	168	4	0.93602	0.621248	0.722212
hsa05010	Alzheimer's disease	IL1B	IL-1|IL1-BETA|IL1F2	interleukin 1 beta	IL1B	168	4	0.93602	0.621248	0.722212
hsa04140	Regulation of autophagy	PRKAA2	AMPK|AMPK2|AMPKa2|PRKAA	protein kinase, AMP-activated, alpha 2 catalytic subunit	PRKAA	39	1	1.00802	0.634885	0.736986
hsa00260	Glycine, serine and threonine metabolism	CTH	-	cystathionine gamma-lyase	CTH	40	1	0.982821	0.643941	0.746407
hsa04012	ErbB signaling pathway	SHC4	RaLP|SHCD	SHC (Src homology 2 domain containing) family member 4	SHC4	87	2	0.903744	0.652147	0.75271
hsa04012	ErbB signaling pathway	PIK3CA	CLOVE|CWS5|MCAP|MCM|MCMTC|PI3K|p110-alpha	phosphatidylinositol-4,5-bisphosphate 3-kinase catalytic subunit alpha	PIK3C	87	2	0.903744	0.652147	0.75271
hsa04975	Fat digestion and absorption	CEL	BAL|BSDL|BSSL|CELL|CEase|FAP|FAPP|LIPA|MODY8	carboxyl ester lipase	CEL	41	1	0.95885	0.652771	0.75271
hsa00230	Purine metabolism	PGM2	MSTP006	phosphoglucomutase 2	PGM2	176	4	0.893474	0.656015	0.75271
hsa00230	Purine metabolism	PDE1A	CAM-PDE-1A|HCAM-1|HCAM1|HSPDE1A	phosphodiesterase 1A	PDE1	176	4	0.893474	0.656015	0.75271
hsa00230	Purine metabolism	PDE3A	CGI-PDE|CGI-PDE A|CGI-PDE-A|HTNB	phosphodiesterase 3A	PDE3A	176	4	0.893474	0.656015	0.75271
hsa00230	Purine metabolism	PDE10A	HSPDE10A	phosphodiesterase 10A	PDE10	176	4	0.893474	0.656015	0.75271
hsa03008	Ribosome biogenesis in eukaryotes	WDR75	NET16|UTP17	WD repeat domain 75	NAN1	89	2	0.883435	0.663993	0.757487
hsa03008	Ribosome biogenesis in eukaryotes	NOP58	HSPC120|NOP5|NOP5/NOP58	NOP58 ribonucleoprotein	NOP58	89	2	0.883435	0.663993	0.757487
hsa05215	Prostate cancer	PDGFRA	CD140A|GAS9|PDGFR-2|PDGFR2|RHEPDGFRA	platelet derived growth factor receptor alpha	PDGFRA	89	2	0.883435	0.663993	0.757487
hsa05215	Prostate cancer	PIK3CA	CLOVE|CWS5|MCAP|MCM|MCMTC|PI3K|p110-alpha	phosphatidylinositol-4,5-bisphosphate 3-kinase catalytic subunit alpha	PIK3C	89	2	0.883435	0.663993	0.757487
hsa04020	Calcium signaling pathway	EDNRA	ET-A|ETA|ETA-R|ETAR|ETRA|MFDA|hET-AR	endothelin receptor type A	EDNRA	180	4	0.873619	0.672556	0.76287
hsa04020	Calcium signaling pathway	PTGER3	EP3|EP3-I|EP3-II|EP3-III|EP3-IV|EP3-VI|EP3e|PGE2-R	prostaglandin E receptor 3	PTGER3	180	4	0.873619	0.672556	0.76287
hsa04020	Calcium signaling pathway	PDGFRA	CD140A|GAS9|PDGFR-2|PDGFR2|RHEPDGFRA	platelet derived growth factor receptor alpha	PDGFRA	180	4	0.873619	0.672556	0.76287
hsa04020	Calcium signaling pathway	PDE1A	CAM-PDE-1A|HCAM-1|HCAM1|HSPDE1A	phosphodiesterase 1A	PDE1	180	4	0.873619	0.672556	0.76287
hsa00071	Fatty acid degradation	ADH1C	ADH3	alcohol dehydrogenase 1C (class I), gamma polypeptide	ADH1_7	44	1	0.893474	0.677963	0.764131
hsa04962	Vasopressin-regulated water reabsorption	DYNC2H1	ATD3|DHC1b|DHC2|DNCH2|DYH1B|SRPS2B|SRTD3|hdhc11	dynein, cytoplasmic 2, heavy chain 1	DYNC2H	44	1	0.893474	0.677963	0.764131
hsa04120	Ubiquitin mediated proteolysis	UBE2W	UBC-16|UBC16	ubiquitin conjugating enzyme E2W (putative)	UBE2W	137	3	0.860865	0.678479	0.764131
hsa04120	Ubiquitin mediated proteolysis	BIRC2	API1|HIAP2|Hiap-2|MIHB|RNF48|c-IAP1|cIAP1	baculoviral IAP repeat containing 2	BIRC2_3	137	3	0.860865	0.678479	0.764131
hsa04120	Ubiquitin mediated proteolysis	SOCS3	ATOD4|CIS3|Cish3|SOCS-3|SSI-3|SSI3	suppressor of cytokine signaling 3	SOCS3	137	3	0.860865	0.678479	0.764131
hsa00270	Cysteine and methionine metabolism	CTH	-	cystathionine gamma-lyase	CTH	45	1	0.873619	0.685945	0.769024
hsa03022	Basal transcription factors	CCNH	CAK|CycH|p34|p37	cyclin H	CCNH	45	1	0.873619	0.685945	0.769024
hsa04666	Fc gamma R-mediated phagocytosis	PIK3CA	CLOVE|CWS5|MCAP|MCM|MCMTC|PI3K|p110-alpha	phosphatidylinositol-4,5-bisphosphate 3-kinase catalytic subunit alpha	PIK3C	93	2	0.845438	0.686697	0.769024
hsa04666	Fc gamma R-mediated phagocytosis	MARCKS	80K-L|MACS|PKCSL|PRKCSL	myristoylated alanine-rich protein kinase C substrate	MARCKS	93	2	0.845438	0.686697	0.769024
hsa04062	Chemokine signaling pathway	CXCL2	CINC-2a|GRO2|GROb|MGSA-b|MIP-2a|MIP2|MIP2A|SCYB2	chemokine (C-X-C motif) ligand 2	CXCL1_2_3	187	4	0.840917	0.700135	0.778806
hsa04062	Chemokine signaling pathway	CXCL8	GCP-1|GCP1|IL8|LECT|LUCT|LYNAP|MDNCF|MONAP|NAF|NAP-1|NAP1	chemokine (C-X-C motif) ligand 8	IL8	187	4	0.840917	0.700135	0.778806
hsa04062	Chemokine signaling pathway	SHC4	RaLP|SHCD	SHC (Src homology 2 domain containing) family member 4	SHC4	187	4	0.840917	0.700135	0.778806
hsa04062	Chemokine signaling pathway	PIK3CA	CLOVE|CWS5|MCAP|MCM|MCMTC|PI3K|p110-alpha	phosphatidylinositol-4,5-bisphosphate 3-kinase catalytic subunit alpha	PIK3C	187	4	0.840917	0.700135	0.778806
hsa00600	Sphingolipid metabolism	UGCG	GCS|GLCT1	UDP-glucose ceramide glucosyltransferase	UGCG	47	1	0.836444	0.701318	0.778806
hsa04961	Endocrine and other factor-regulated calcium reabsorption	ATP1B3	ATPB-3|CD298	ATPase, Na+/K+ transporting, beta 3 polypeptide	ATP1B	47	1	0.836444	0.701318	0.778806
hsa01212	Fatty acid metabolism	HACD4	PTPLAD2	3-hydroxyacyl-CoA dehydratase 4	PHS1	48	1	0.819018	0.708718	0.784398
hsa04070	Phosphatidylinositol signaling system	PIK3CA	CLOVE|CWS5|MCAP|MCM|MCMTC|PI3K|p110-alpha	phosphatidylinositol-4,5-bisphosphate 3-kinase catalytic subunit alpha	PIK3C	98	2	0.802303	0.713269	0.784398
hsa04070	Phosphatidylinositol signaling system	PPIP5K2	CFAP160|HISPPD1|IP7K2|VIP2	diphosphoinositol pentakisphosphate kinase 2	PPIP5K	98	2	0.802303	0.713269	0.784398
hsa04972	Pancreatic secretion	ATP1B3	ATPB-3|CD298	ATPase, Na+/K+ transporting, beta 3 polypeptide	ATP1B	98	2	0.802303	0.713269	0.784398
hsa04750	Inflammatory mediator regulation of TRP channels	IL1B	IL-1|IL1-BETA|IL1F2	interleukin 1 beta	IL1B	98	2	0.802303	0.713269	0.784398
hsa04750	Inflammatory mediator regulation of TRP channels	PIK3CA	CLOVE|CWS5|MCAP|MCM|MCMTC|PI3K|p110-alpha	phosphatidylinositol-4,5-bisphosphate 3-kinase catalytic subunit alpha	PIK3C	98	2	0.802303	0.713269	0.784398
hsa04972	Pancreatic secretion	CEL	BAL|BSDL|BSSL|CELL|CEase|FAP|FAPP|LIPA|MODY8	carboxyl ester lipase	CEL	98	2	0.802303	0.713269	0.784398
hsa05030	Cocaine addiction	FOSB	AP-1|G0S3|GOS3|GOSB	FBJ murine osteosarcoma viral oncogene homolog B	FOSB	49	1	0.802303	0.715934	0.78624
hsa00330	Arginine and proline metabolism	SAT1	DC21|KFSD|KFSDX|SAT|SSAT|SSAT-1	spermidine/spermine N1-acetyltransferase 1	speG	50	1	0.786257	0.72297	0.791777
hsa04913	Ovarian Steroidogenesis	PTGS2	COX-2|COX2|GRIPGHS|PGG/HS|PGHS-2|PHS-2|hCox-2	prostaglandin-endoperoxide synthase 2 (prostaglandin G/H synthase and cyclooxygenase)	PTGS2	50	1	0.786257	0.72297	0.791777
hsa04922	Glucagon signaling pathway	SIK1	EIEE30|MSK|SIK|SNF1LK	salt inducible kinase 1	SIK1	101	2	0.778472	0.728277	0.795394
hsa04922	Glucagon signaling pathway	PRKAA2	AMPK|AMPK2|AMPKa2|PRKAA	protein kinase, AMP-activated, alpha 2 catalytic subunit	PRKAA	101	2	0.778472	0.728277	0.795394
hsa05110	Vibrio cholerae infection	ATP6V1D	ATP6M|VATD|VMA8	ATPase, H+ transporting, lysosomal 34kDa, V1 subunit D	ATPeV1D	51	1	0.77084	0.729831	0.795997
hsa00310	Lysine degradation	AASS	LKR/SDH|LKRSDH|LORSDH	aminoadipate-semialdehyde synthase	AASS	52	1	0.756016	0.736521	0.801093
hsa05213	Endometrial cancer	PIK3CA	CLOVE|CWS5|MCAP|MCM|MCMTC|PI3K|p110-alpha	phosphatidylinositol-4,5-bisphosphate 3-kinase catalytic subunit alpha	PIK3C	52	1	0.756016	0.736521	0.801093
hsa04660	T cell receptor signaling pathway	FOS	AP-1|C-FOS|p55	FBJ murine osteosarcoma viral oncogene homolog	FOS	104	2	0.756016	0.742606	0.804881
hsa04660	T cell receptor signaling pathway	PIK3CA	CLOVE|CWS5|MCAP|MCM|MCMTC|PI3K|p110-alpha	phosphatidylinositol-4,5-bisphosphate 3-kinase catalytic subunit alpha	PIK3C	104	2	0.756016	0.742606	0.804881
hsa04340	Hedgehog signaling pathway	PTCH1	BCNS|HPE7|NBCCS|PTC|PTC1|PTCH|PTCH11	patched 1	PTCH1	53	1	0.741752	0.743045	0.804881
hsa05217	Basal cell carcinoma	PTCH1	BCNS|HPE7|NBCCS|PTC|PTC1|PTCH|PTCH11	patched 1	PTCH1	55	1	0.714779	0.755609	0.817375
hsa00500	Starch and sucrose metabolism	PGM2	MSTP006	phosphoglucomutase 2	PGM2	56	1	0.702015	0.761657	0.822657
hsa04630	Jak-STAT signaling pathway	IL6	BSF-2|BSF2|CDF|HGF|HSF|IFN-beta-2|IFNB2|IL-6	interleukin 6	IL6	158	3	0.746447	0.764636	0.822657
hsa04630	Jak-STAT signaling pathway	SOCS3	ATOD4|CIS3|Cish3|SOCS-3|SSI-3|SSI3	suppressor of cytokine signaling 3	SOCS3	158	3	0.746447	0.764636	0.822657
hsa04630	Jak-STAT signaling pathway	PIK3CA	CLOVE|CWS5|MCAP|MCM|MCMTC|PI3K|p110-alpha	phosphatidylinositol-4,5-bisphosphate 3-kinase catalytic subunit alpha	PIK3C	158	3	0.746447	0.764636	0.822657
hsa05221	Acute myeloid leukemia	PIK3CA	CLOVE|CWS5|MCAP|MCM|MCMTC|PI3K|p110-alpha	phosphatidylinositol-4,5-bisphosphate 3-kinase catalytic subunit alpha	PIK3C	57	1	0.689699	0.767555	0.82468
hsa04725	Cholinergic synapse	FOS	AP-1|C-FOS|p55	FBJ murine osteosarcoma viral oncogene homolog	FOS	111	2	0.70834	0.773516	0.828841
hsa04725	Cholinergic synapse	PIK3CA	CLOVE|CWS5|MCAP|MCM|MCMTC|PI3K|p110-alpha	phosphatidylinositol-4,5-bisphosphate 3-kinase catalytic subunit alpha	PIK3C	111	2	0.70834	0.773516	0.828841
hsa00590	Arachidonic acid metabolism	PTGS2	COX-2|COX2|GRIPGHS|PGG/HS|PGHS-2|PHS-2|hCox-2	prostaglandin-endoperoxide synthase 2 (prostaglandin G/H synthase and cyclooxygenase)	PTGS2	62	1	0.634078	0.794916	0.850624
hsa04721	Synaptic vesicle cycle	ATP6V1D	ATP6M|VATD|VMA8	ATPase, H+ transporting, lysosomal 34kDa, V1 subunit D	ATPeV1D	63	1	0.624013	0.799987	0.853793
hsa04919	Thyroid hormone signaling pathway	ATP1B3	ATPB-3|CD298	ATPase, Na+/K+ transporting, beta 3 polypeptide	ATP1B	118	2	0.666319	0.801103	0.853793
hsa04919	Thyroid hormone signaling pathway	PIK3CA	CLOVE|CWS5|MCAP|MCM|MCMTC|PI3K|p110-alpha	phosphatidylinositol-4,5-bisphosphate 3-kinase catalytic subunit alpha	PIK3C	118	2	0.666319	0.801103	0.853793
hsa04722	Neurotrophin signaling pathway	SHC4	RaLP|SHCD	SHC (Src homology 2 domain containing) family member 4	SHC4	120	2	0.655214	0.808413	0.858403
hsa04722	Neurotrophin signaling pathway	PIK3CA	CLOVE|CWS5|MCAP|MCM|MCMTC|PI3K|p110-alpha	phosphatidylinositol-4,5-bisphosphate 3-kinase catalytic subunit alpha	PIK3C	120	2	0.655214	0.808413	0.858403
hsa00830	Retinol metabolism	ADH1C	ADH3	alcohol dehydrogenase 1C (class I), gamma polypeptide	ADH1_7	65	1	0.604813	0.809753	0.858403
hsa05131	Shigellosis	CXCL8	GCP-1|GCP1|IL8|LECT|LUCT|LYNAP|MDNCF|MONAP|NAF|NAP-1|NAP1	chemokine (C-X-C motif) ligand 8	IL8	65	1	0.604813	0.809753	0.858403
hsa05211	Renal cell carcinoma	PIK3CA	CLOVE|CWS5|MCAP|MCM|MCMTC|PI3K|p110-alpha	phosphatidylinositol-4,5-bisphosphate 3-kinase catalytic subunit alpha	PIK3C	66	1	0.595649	0.814455	0.862237
hsa04152	AMPK signaling pathway	PRKAA2	AMPK|AMPK2|AMPKa2|PRKAA	protein kinase, AMP-activated, alpha 2 catalytic subunit	PRKAA	124	2	0.634078	0.822311	0.868238
hsa04152	AMPK signaling pathway	PIK3CA	CLOVE|CWS5|MCAP|MCM|MCMTC|PI3K|p110-alpha	phosphatidylinositol-4,5-bisphosphate 3-kinase catalytic subunit alpha	PIK3C	124	2	0.634078	0.822311	0.868238
hsa04664	Fc epsilon RI signaling pathway	PIK3CA	CLOVE|CWS5|MCAP|MCM|MCMTC|PI3K|p110-alpha	phosphatidylinositol-4,5-bisphosphate 3-kinase catalytic subunit alpha	PIK3C	68	1	0.57813	0.823511	0.868351
hsa00982	Drug metabolism - cytochrome P450	ADH1C	ADH3	alcohol dehydrogenase 1C (class I), gamma polypeptide	ADH1_7	69	1	0.569751	0.827872	0.870298
hsa03320	PPAR signaling pathway	GK	GK1|GKD	glycerol kinase	glpK	69	1	0.569751	0.827872	0.870298
hsa05034	Alcoholism	H3F3B	H3.3B	H3 histone, family 3B (H3.3B)	H3	179	3	0.658875	0.830838	0.870298
hsa05034	Alcoholism	SHC4	RaLP|SHCD	SHC (Src homology 2 domain containing) family member 4	SHC4	179	3	0.658875	0.830838	0.870298
hsa05034	Alcoholism	FOSB	AP-1|G0S3|GOS3|GOSB	FBJ murine osteosarcoma viral oncogene homolog B	FOSB	179	3	0.658875	0.830838	0.870298
hsa00562	Inositol phosphate metabolism	PIK3CA	CLOVE|CWS5|MCAP|MCM|MCMTC|PI3K|p110-alpha	phosphatidylinositol-4,5-bisphosphate 3-kinase catalytic subunit alpha	PIK3C	71	1	0.553702	0.83627	0.872458
hsa04918	Thyroid hormone synthesis	ATP1B3	ATPB-3|CD298	ATPase, Na+/K+ transporting, beta 3 polypeptide	ATP1B	71	1	0.553702	0.83627	0.872458
hsa04976	Bile secretion	ATP1B3	ATPB-3|CD298	ATPase, Na+/K+ transporting, beta 3 polypeptide	ATP1B	71	1	0.553702	0.83627	0.872458
hsa04728	Dopaminergic synapse	FOS	AP-1|C-FOS|p55	FBJ murine osteosarcoma viral oncogene homolog	FOS	129	2	0.609502	0.838395	0.872458
hsa04728	Dopaminergic synapse	CLOCK	KAT13D|bHLHe8	clock circadian regulator	CLOCK	129	2	0.609502	0.838395	0.872458
hsa00980	Metabolism of xenobiotics by cytochrome P450	ADH1C	ADH3	alcohol dehydrogenase 1C (class I), gamma polypeptide	ADH1_7	73	1	0.538532	0.844256	0.877407
hsa00190	Oxidative phosphorylation	NDUFB2	AGGG|CI-AGGG	NADH:ubiquinone oxidoreductase subunit B2	NDUFB2	133	2	0.591171	0.850292	0.881373
hsa00190	Oxidative phosphorylation	ATP6V1D	ATP6M|VATD|VMA8	ATPase, H+ transporting, lysosomal 34kDa, V1 subunit D	ATPeV1D	133	2	0.591171	0.850292	0.881373
hsa05012	Parkinson's disease	NDUFB2	AGGG|CI-AGGG	NADH:ubiquinone oxidoreductase subunit B2	NDUFB2	142	2	0.553702	0.87417	0.903764
hsa05012	Parkinson's disease	LRRK2	AURA17|DARDARIN|PARK8|RIPK7|ROCO2	leucine-rich repeat kinase 2	LRRK2	142	2	0.553702	0.87417	0.903764
hsa04146	Peroxisome	FAR1	MLSTD2|PFCRD|SDR10E1	fatty acyl-CoA reductase 1	FAR	83	1	0.473649	0.878685	0.907251
hsa04911	Insulin secretion	ATP1B3	ATPB-3|CD298	ATPase, Na+/K+ transporting, beta 3 polypeptide	ATP1B	85	1	0.462504	0.884592	0.912164
hsa04540	Gap junction	PDGFRA	CD140A|GAS9|PDGFR-2|PDGFR2|RHEPDGFRA	platelet derived growth factor receptor alpha	PDGFRA	88	1	0.446737	0.892916	0.918362
hsa04727	GABAergic synapse	SLC38A2	ATA2|PRO1068|SAT2|SNAT2	solute carrier family 38 member 2	SLC38A2	88	1	0.446737	0.892916	0.918362
hsa04970	Salivary secretion	ATP1B3	ATPB-3|CD298	ATPase, Na+/K+ transporting, beta 3 polypeptide	ATP1B	89	1	0.441717	0.895555	0.919884
hsa04390	Hippo signaling pathway	FGF1	AFGF|ECGF|ECGF-beta|ECGFA|ECGFB|FGF-1|FGF-alpha|FGFA|GLIO703|HBGF-1|HBGF1	fibroblast growth factor 1	FGF1	154	2	0.510556	0.90052	0.921528
hsa04390	Hippo signaling pathway	BIRC2	API1|HIAP2|Hiap-2|MIHB|RNF48|c-IAP1|cIAP1	baculoviral IAP repeat containing 2	BIRC2_3	154	2	0.510556	0.90052	0.921528
hsa03015	mRNA surveillance pathway	PCF11	-	PCF11 cleavage and polyadenylation factor subunit	PCF11	91	1	0.432009	0.900637	0.921528
hsa04713	Circadian entrainment	FOS	AP-1|C-FOS|p55	FBJ murine osteosarcoma viral oncogene homolog	FOS	95	1	0.413819	0.910067	0.929979
hsa04914	Progesterone-mediated oocyte maturation	PIK3CA	CLOVE|CWS5|MCAP|MCM|MCMTC|PI3K|p110-alpha	phosphatidylinositol-4,5-bisphosphate 3-kinase catalytic subunit alpha	PIK3C	98	1	0.401152	0.916545	0.935394
hsa04723	Retrograde endocannabinoid signaling	PTGS2	COX-2|COX2|GRIPGHS|PGG/HS|PGHS-2|PHS-2|hCox-2	prostaglandin-endoperoxide synthase 2 (prostaglandin G/H synthase and cyclooxygenase)	PTGS2	101	1	0.389236	0.922554	0.940318
hsa04360	Axon guidance	PTCH1	BCNS|HPE7|NBCCS|PTC|PTC1|PTCH|PTCH11	patched 1	PTCH1	174	2	0.451872	0.933234	0.948768
hsa04360	Axon guidance	PIK3CA	CLOVE|CWS5|MCAP|MCM|MCMTC|PI3K|p110-alpha	phosphatidylinositol-4,5-bisphosphate 3-kinase catalytic subunit alpha	PIK3C	174	2	0.451872	0.933234	0.948768
hsa04726	Serotonergic synapse	PTGS2	COX-2|COX2|GRIPGHS|PGG/HS|PGHS-2|PHS-2|hCox-2	prostaglandin-endoperoxide synthase 2 (prostaglandin G/H synthase and cyclooxygenase)	PTGS2	112	1	0.351008	0.941099	0.95554
hsa01200	Carbon metabolism	RPE	RPE2-1	ribulose-5-phosphate-3-epimerase	rpe	113	1	0.347901	0.942545	0.955787
hsa04724	Glutamatergic synapse	SLC38A2	ATA2|PRO1068|SAT2|SNAT2	solute carrier family 38 member 2	SLC38A2	114	1	0.34485	0.943956	0.955996
hsa04071	Sphingolipid signaling pathway	PIK3CA	CLOVE|CWS5|MCAP|MCM|MCMTC|PI3K|p110-alpha	phosphatidylinositol-4,5-bisphosphate 3-kinase catalytic subunit alpha	PIK3C	120	1	0.327607	0.951718	0.96263
hsa04611	Platelet activation	PIK3CA	CLOVE|CWS5|MCAP|MCM|MCMTC|PI3K|p110-alpha	phosphatidylinositol-4,5-bisphosphate 3-kinase catalytic subunit alpha	PIK3C	122	1	0.322236	0.954058	0.963768
hsa04270	Vascular smooth muscle contraction	EDNRA	ET-A|ETA|ETA-R|ETAR|ETRA|MFDA|hET-AR	endothelin receptor type A	EDNRA	130	1	0.302407	0.962331	0.97089
hsa03010	Ribosome	RSL24D1	C15orf15|HRP-L30-iso|L30|RLP24|RPL24|RPL24L|TVAS3	ribosomal L24 domain containing 1	RP-L24e	137	1	0.286955	0.968332	0.975705
hsa04080	Neuroactive ligand-receptor interaction	EDNRA	ET-A|ETA|ETA-R|ETAR|ETRA|MFDA|hET-AR	endothelin receptor type A	EDNRA	305	3	0.386684	0.981729	0.985452
hsa04080	Neuroactive ligand-receptor interaction	PTGER3	EP3|EP3-I|EP3-II|EP3-III|EP3-IV|EP3-VI|EP3e|PGE2-R	prostaglandin E receptor 3	PTGER3	305	3	0.386684	0.981729	0.985452
hsa04080	Neuroactive ligand-receptor interaction	GLRB	HKPX2	glycine receptor beta	GLRB	305	3	0.386684	0.981729	0.985452
hsa05016	Huntington's disease	NDUFB2	AGGG|CI-AGGG	NADH:ubiquinone oxidoreductase subunit B2	NDUFB2	193	1	0.203694	0.992051	0.994557
hsa04740	Olfactory transduction	RGS2	G0S8	regulator of G-protein signaling 2	RGS2	415	2	0.18946	0.999603	0.999603
hsa04740	Olfactory transduction	PDE1A	CAM-PDE-1A|HCAM-1|HCAM1|HSPDE1A	phosphodiesterase 1A	PDE1	415	2	0.18946	0.999603	0.999603
